# Supplementary material for: Sex work and HIV in Cambodia: trajectories of risk and disease in two cohorts of high-risk young women in Phnom Penh, Cambodia
Source: PubMed Central journal article supplement — BMJ Open. 2013 Sep 7;3(9):e003095. doi: 10.1136/bmjopen-2013-003095 (PMC3773643; doi:10.1136/bmjopen-2013-003095), 2013-09-07
Supplement: bmjopen-2013-003095.draft_revisions.pdf [file bmjopen-2013-003095.draft_revisions.pdf]

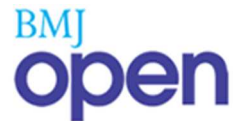

**Sex work and HIV in Cambodia: trajectories of risk and disease in two cohorts of high risk young women in Phnom Penh, Cambodia**

|                                 |                                                                                                                                                                                                                                                                                                                                                                                                                                                                                                                                                                                                                                                                    |
|---------------------------------|--------------------------------------------------------------------------------------------------------------------------------------------------------------------------------------------------------------------------------------------------------------------------------------------------------------------------------------------------------------------------------------------------------------------------------------------------------------------------------------------------------------------------------------------------------------------------------------------------------------------------------------------------------------------|
| Journal:                        | <i>BMJ Open</i>                                                                                                                                                                                                                                                                                                                                                                                                                                                                                                                                                                                                                                                    |
| Manuscript ID:                  | bmjopen-2013-003095                                                                                                                                                                                                                                                                                                                                                                                                                                                                                                                                                                                                                                                |
| Article Type:                   | Research                                                                                                                                                                                                                                                                                                                                                                                                                                                                                                                                                                                                                                                           |
| Date Submitted by the Author:   | 23-Apr-2013                                                                                                                                                                                                                                                                                                                                                                                                                                                                                                                                                                                                                                                        |
| Complete List of Authors:       | Page, Kimberly; University of California San Francisco, Epidemiology and Biostatistics<br>Stein, Ellen; UCSF, Epidemiology & Biotatistics<br>Sansothy, Neth; NCHADS,<br>Evans, Jennifer; UCSF, Epidemiology & Biotatistics<br>Couture, Marie-Claude; UCSF, Epidemiology & Biotatistics<br>Sichan, Keo; Cambodia Women's Development Assoc.,<br>Cockroft, Melissa; Cambodia Women's Development Assoc.,<br>Mooney-Somers, Julie; University of Sydney, Center for Values, Ethics and the Law in Medicine<br>Phlong, Pisith; Royal University of Fine Arts,<br>Kaldor, John; University of New South Wales, The Kirby Institute<br>Maher, Lisa; The Kirby Institute, |
| <b>Primary Subject Heading</b>: | HIV/AIDS                                                                                                                                                                                                                                                                                                                                                                                                                                                                                                                                                                                                                                                           |
| Secondary Subject Heading:      | Epidemiology, Global health, HIV/AIDS, Public health                                                                                                                                                                                                                                                                                                                                                                                                                                                                                                                                                                                                               |
| Keywords:                       | EPIDEMIOLOGY, HIV & AIDS < INFECTIOUS DISEASES, Public health < INFECTIOUS DISEASES                                                                                                                                                                                                                                                                                                                                                                                                                                                                                                                                                                                |
|                                 |                                                                                                                                                                                                                                                                                                                                                                                                                                                                                                                                                                                                                                                                    |

SCHOLARONE™  
Manuscripts

1 Sex work and HIV in Cambodia: trajectories of risk and disease in two cohorts of high  
2 risk young women in Phnom Penh, Cambodia  
3  
4  
5  
6  
7  
8  
9

10 Kimberly Page, Ph.D.<sup>1</sup>, Ellen Stein, MPH<sup>1</sup>, Neth Sansothy, M.D.<sup>2</sup>, Jennifer Evans, M.S.<sup>1</sup>,  
11 Marie-Claude Couture, Ph.D.<sup>1</sup>, Keo Sichan<sup>3</sup>, Melissa Cockroft, BA<sup>3\*</sup>, Julie Mooney-  
12 Somers, Ph.D.<sup>4, 5</sup>, Pisith Phlong, M.A.<sup>6</sup>, John Kaldor, Ph.D.<sup>4</sup>, Lisa Maher Ph.D.<sup>4</sup>, (on  
13 behalf of the Young Women's Health Study Collaborative: John Kaldor, Ph.D.<sup>4</sup>, Serey  
14 Phal Kien<sup>3</sup>, Kimberly Page, Ph.D.<sup>1</sup>, Joel M. Palefsky M.D.<sup>7</sup>, Vonthanak Saphonn, M.D.<sup>2</sup>,  
15 Mean Chhi Vun, M.D.<sup>2</sup>).

- 26 1. University of California San Francisco, Department of Epidemiology and Biostatistics;  
27 San Francisco, and Global Health Sciences, 50 Beale St., 12<sup>th</sup> Floor, San Francisco, CA,  
28 94105; USA
- 29 2. National Center for HIV/AIDS, Dermatology and STDs (NCHADS), #245H, Street 6A,  
30 Phum Kean Khlang, Sangkat Prekleap Russey Keo, Phnom Penh, Cambodia
- 31 3. Cambodian Women's Development Association (CWDA); No. 19, Street 242, Boeung  
32 Prolit, Khan 7 Makara, Phnom Penh, Cambodia
- 33 4. The Kirby Institute (formerly the National Centre in HIV Epidemiology and Clinical  
34 Research); University of New South Wales, CFI building, corner of West and Boundary  
35 Streets, Darlinghurst, NSW 2010, Australia
- 36 5. The Centre for Values, Ethics and the Law in Medicine, The University of Sydney  
37 Level 1 of the Medical Foundation Building, 92-94 Parramatta Road, Camperdown, NSW,  
38 Australia
- 39 6. Royal University of Fine Arts, 72 Street 19, Phnom Penh, Cambodia.

1  
2  
3  
4  
5  
6  
7  
8  
9  
10  
11  
12  
13  
14  
15  
16  
17  
18  
19  
20  
21  
22  
23  
24  
25  
26  
27  
28  
29  
30  
31  
32  
33  
34  
35  
36  
37  
38  
39  
40  
41  
42  
43  
44  
45  
46  
47  
48  
49  
50  
51  
52  
53  
54  
55  
56  
57  
58  
59  
60

7. University of California San Francisco, Department of Medicine; 513 Parnassus Ave,  
Med Sci S-420; UCSF, San Francisco, San Francisco, CA. 94143 - 0654

\*Melissa Cockroft is currently at Marie Stopes International in Phnom Pehn, Cambodia

Address correspondence to:

Kimberly Page, Ph.D., MPH, Dept. of Epidemiology and Biostatistics, Global Health  
Sciences, University of California San Francisco, CA 94105; 50 Beale St., 12<sup>th</sup> Floor, San  
Francisco, CA USA, 94105. [kpage@psg.ucsf.edu](mailto:kpage@psg.ucsf.edu)

Word count: Abstract: 296; Text 3444; 3 Tables, 2 Figures.

Key words: Cambodia, female sex workers, HIV, STI, risk, amphetamine-type  
stimulant, alcohol, policy effects

Short title: HIV infection and risk in two samples of FSW in Phnom Penh, Cambodia

## Abstract

**Objectives:** HIV prevalence among Cambodian female sex workers (FSW) is among the highest in Southeast Asia. We describe HIV prevalence and associated risk exposures in FSW sampled serially in Phnom Penh, Cambodia (Young Women's Health Study (YWHS), before and after the implementation of a new law designed to combat human trafficking and sexual exploitation.

**Design:** Cross-sectional analysis of baseline data from two prospective cohorts.

**Setting:** Community-based study in Phnom Penh, Cambodia.

**Participants:** Women aged 15-29 years, reporting  $\geq 2$  sexual partners in the last month and/or engaged in transactional sex in the last 3 months, were enrolled in the studies in 2007 (N=161; YWHS-1), and 2009 (N=220; YWHS-2) following information sessions where 285 and 345 women attended.

**Primary outcomes:** HIV prevalence, sexual risk behaviour, amphetamine-type stimulant (ATS) and alcohol use, and work-related factors were compared the two groups, enrolled before and after implementation of the new law.

**Results:** Participants and in the two cohorts were similar in age (median 25 years), but YWHS-2 women reported fewer sex partners, more alcohol use, and less ATS use. A higher proportion of YWHS-2 compared to YWHS-1 women worked in entertainment-based venues (68% vs. 31%, respectively). HIV prevalence was significantly lower in the more recently sampled women: 9.2% (95% CI 4.5, 13.8) vs. 23% (95% CI 16.5, 29.7).

**Conclusions:** Sex work context and risk has shifted among young FSW in Phnom Penh, following implementation of anti-prostitution and anti-trafficking laws. While both cohorts were recruited using the same eligibility criteria, more recently sampled women had lower prevalence of sexual risk and HIV infection. Women engaged more directly in transactional sex have become harder to sample and access. Future prevention

1 research and programs need to consider how new policies and demographic changes in  
2  
3  
4 FSW impact HIV transmission.  
5  
6  
7  
8  
9  
10  
11  
12  
13  
14  
15  
16  
17  
18  
19  
20  
21  
22  
23  
24  
25  
26  
27  
28  
29  
30  
31  
32  
33  
34  
35  
36  
37  
38  
39  
40  
41  
42  
43  
44  
45  
46  
47  
48  
49  
50  
51  
52  
53  
54  
55  
56  
57  
58  
59  
60

For peer review only

## Article summary

### Article Focus

- HIV prevalence and incidence in two serial samples of young female sex workers in Phnom Penh, Cambodia (2007-2008, and 2009-2010);
- Comparison of baseline risk and HIV outcomes, including sexual behavior, drug and alcohol use in the two cohorts sampled before and after implementation of anti-trafficking and sexual exploitation laws in 2008;
- Impact of anti-trafficking and sexual exploitation legislation on female sex workers and HIV risk.

### Key Messages

- Women sampled using the same eligibility criteria and outreach methods in differed with respect to risk exposures and HIV outcomes;
- Changes in sex work typology and environment are evident after enactment of the anti-trafficking laws, including very few brothel-based FSW and significantly more FSW based in the entertainment sector;
- Shifts in the context of sex work and risk highlight the ongoing need and challenges for HIV and drug prevention for young women engaged in sex work.

### Strengths and Limitations

- Two comparably sampled groups of young FSW suggest changing trends in HIV risk;
- Comparison of cross-sectional samples is ecological and does not prove temporal effects;
- Criminalization and suppression of sex work and a flourishing entertainment-based sex work industry set new and conflicting stage for HIV prevention.

1 Author Contributions: All authors contributed to the design and implementation of the  
2  
3 YWHS-1 and -2 studies. Authors KP, ES, JE, and LM compiled the first draft of the  
4  
5 manuscript, which was reviewed by NS, M-CC, KS, MC, JM\_S, PP, JK. The primary  
6  
7 statistical analysis was conducted by JE and M-CC; KS and MC provided supplemental  
8  
9 data review, and KP reviewed all data analyses. All authors contributed to and have  
10  
11 approved the final manuscript. The YWHS Collaborative is a steering committee who  
12  
13 reviewed and approved the study protocols, and provided expertise into some or all of  
14  
15 the studies' methods and implementation.  
16  
17  
18  
19  
20  
21

22 Data Sharing: no additional data available.  
23  
24  
25

26 Funding sources and conflicts of interest: The Young Women's Health Study-1 and  
27  
28 YWHS-2 were supported by Awards 1R21DA025441 from the National Institute on Drug  
29  
30 Abuse, and R01NR010995 from the National Institute of Nursing Research. M-C Couture  
31  
32 was also supported by the Canadian Institutes of Health Research (postdoctoral  
33  
34 fellowship award). Professors Lisa Maher and John Kaldor are supported by Australian  
35  
36 National Health and Medical Research Council (NHMRC) Research Fellowship. The Kirby  
37  
38 Institute is affiliated with the Faculty of Medicine, University of New South Wales and is  
39  
40 funded by the Australian Government Department of Health and Ageing. The content is  
41  
42 solely the responsibility of the authors and does not necessarily represent the official  
43  
44 views of the National Institutes of Health, nor the Australian Government. The authors  
45  
46 have no conflicts to disclose.  
47  
48  
49  
50  
51  
52  
53

54 Acknowledgments: The authors would like to acknowledge the coordinated efforts and  
55  
56 dedication of the research teams at the National Center for HIV/AIDS, Dermatology,  
57  
58 and STDs and the Cambodian Women's Development Agency. We are indebted to all the  
59  
60

1  
2  
3  
4  
5  
6  
7  
8  
9  
10  
11  
12  
13  
14  
15  
16  
17  
18  
19  
20  
21  
22  
23  
24  
25  
26  
27  
28  
29  
30  
31  
32  
33  
34  
35  
36  
37  
38  
39  
40  
41  
42  
43  
44  
45  
46  
47  
48  
49  
50  
51  
52  
53  
54  
55  
56  
57  
58  
59  
60

Cambodian women who agreed to participate in this study and grateful for the privilege to work with them.

For peer review only



## Introduction

There have been significant declines in HIV prevalence in Cambodia since the epidemic peaked in around 2000, a success widely attributed to measurable increases in condom use, declines in the number and frequency of commercial sex transactions reported by men, access to HIV voluntary counseling & testing (VCT) and uptake of antiretroviral therapy.<sup>1-3</sup> In 2010, the National Center for HIV/AIDS, Dermatology and STDs (NCHADS) revised the national estimate of HIV prevalence to 0.8% (in 15-49 year olds), reflecting a significant decline after the peak estimate of 2.4% in 1998.<sup>4</sup> However, HIV prevalence in Cambodian women, especially young women, is among the highest in Southeast Asia and heterosexual sex remains the main route of transmission.<sup>5-9</sup> Since 2006, women have accounted for over half (52%) of all HIV infections in Cambodia<sup>10</sup>, higher than in Asia and the Pacific in general (35%).<sup>11</sup> Limited income generating activities, a highly mobile workforce, trafficking in women and girls and widespread transactional sex, poverty, and sexually transmitted infections (STI) have been identified as key drivers of the epidemic among female sex workers (FSW).<sup>1 5 6 10 12-15</sup> As in many countries, FSW in Cambodia can be hard to reach and difficult to provide prevention services to. In recent years significant economic and policy changes have affected the sex work landscape, with notable shifts in sex work venues, typologies, and more women engaged in transactional sex than ever before.<sup>16-20</sup>

Until 2008, FSW in Cambodia were categorized as "direct" and were mostly brothel-based, or "indirect". Indirect FSW were distinguished from direct FSW, generally working in entertainment establishments as beer promotion girls, waitresses, hostesses, or karaoke girls for example, and engaged in occasional transactional sex for supplementary income.<sup>21-23</sup> In 1997, an estimated 5,300 women worked in the entertainment/service sector and 6,000 were brothel-based FSW. Following the passage

1 and implementation of the "Law on Suppression of Human Trafficking and Sexual  
2 Exploitation" in February, 2008, brothel-based sex work was banned, and the direct sex  
3 trade went "underground".<sup>10</sup> The number of women involved in entertainment-based  
4 sex work increased dramatically to an estimated 41,622 women, a more than threefold  
5 increase from the 2008 estimate of 12,762 (NCHADS, personal communication). Along  
6 with the overt enforcement against FSW, the 2008 anti-trafficking legislation had other  
7 consequences. For instance, official terminology used by governmental and non-  
8 governmental organizations (NGO) to describe FSW labeled all women engaged in sex  
9 and entertainment work as "entertainment workers", or EW\*. Historically, brothel-based  
10 FSW were easily accessed and monitored for HIV prevention efforts, including HIV and  
11 behavioral surveillance. NGOs working in HIV prevention reported that as transactional  
12 sex was displaced to a wider range of settings, women at highest risk became harder to  
13 reach for both prevention and service delivery.<sup>16 24 25</sup> These factors pose significant  
14 challenges to HIV prevention and threaten to undermine progress achieved to date.

15  
16  
17  
18  
19  
20  
21  
22  
23  
24  
25  
26  
27  
28  
29  
30  
31  
32  
33  
34  
35  
36 HIV prevalence is extremely high among Cambodian FSW with prevalence among  
37 younger women is particularly troubling as their infection is likely to be more recent and  
38 indicative of incidence.<sup>5 8 9 21</sup> A cornerstone of HIV prevention in Cambodia was the  
39 100% Condom Use campaign<sup>26 27</sup>, primarily directed at brothel-based FSW. With  
40 changes in sex work venues, this prevention approach is likely less effective, failing to  
41 reach the large number of women now engaged in transactional sex in entertainment

---

42  
43  
44  
45  
46  
47  
48  
49  
50 \* The term 'female sex worker' is no longer used in Cambodia. Terminology was changed in 2008  
51 to designate high risk women working in service and entertainment venues as "entertainment  
52 workers" or EW. No new HIV surveillance data has been published on FSW, and Behavioral  
53 Surveillance Survey (BSS) methods have been changed to recognize only indirect sex workers-  
54 'EW', and determining whether or not they are selling sex by the average number of reported  
55 sex partners per week (10. UNAIDS. Cambodia Country Progress Report: Monitoring the  
56 Progress towards the Implementation of the Declaration of Commitment on HIV and AIDS.  
57 Reporting period: January 2010-December 2011. Prepared by National AIDS Authority for United  
58 Nations General Assembly Special Session (UNGASS).  
59 <http://www.unaids.org/en/regionscountries/countries/cambodia/> Accessed December 28, 2012..

1 establishments. Indeed, measures of self-reported condom use have declined according  
2  
3 to monitoring data reported by UNAIDS.<sup>10</sup> New risk factors have also emerged,  
4  
5 especially amphetamine-type stimulant (ATS) use, in the form of “yama”, (pills) and  
6  
7 “ice” (a crystalline form).<sup>28-38</sup> ATS use is associated with increased sexual risk behavior  
8  
9 and STI incidence among these young women<sup>5 39</sup>, similar to that seen in other  
10  
11 populations and locales.<sup>40-44</sup>  
12  
13  
14  
15  
16

17 We conducted two prospective studies of high-risk young women engaged in  
18  
19 transactional sex in Phnom Penh, assessing HIV infection and associated health risks.  
20  
21 The first, Young Women’s Health Study (YWHS-1), was conducted in 2007-2008 and the  
22  
23 second, YWHS-2, in 2009-2010.<sup>5 16 39 45 46</sup> In this paper, we explore the changing HIV  
24  
25 risk landscape by comparing and contrasting the two cohorts of FSW sampled prior to,  
26  
27 and following, legislative changes designed to combat human trafficking and sexual  
28  
29 exploitation in Cambodia.  
30  
31  
32  
33  
34  
35

## 36 **Methods**

### 37 ***Study setting***

38 The YWHS-1 and YWHS-2 were both prospective studies of young women engaged in  
39  
40 sex work in Phnom Penh, Cambodia. Methods have been described in detail previously.<sup>5</sup>  
41  
42  
43  
44  
45  
46  
47  
48  
49  
50  
51  
52  
53  
54  
55  
56  
57  
58  
59  
60

### ***Study population and recruitment***

1 The target population in both studies was young women engaged in transactional sex in  
2  
3 Phnom Penh. Inclusion criteria were: aged 15-29 years, Khmer language  
4  
5 comprehension,  $\geq 2$  different sexual partners in the last month *or* engaged in  
6  
7 transactional sex (sex in exchange for money, goods, services, or drugs) within the last  
8  
9 three months, no plans to move in the next 12 months, biologically female, and able to  
10  
11 provide voluntary informed consent. YWHS-1 aimed to sample 160 women to provide  
12  
13 80% power to estimate a point prevalence of HIV at 15% with a 95% confidence  
14  
15 interval (CI) of 9.7% to 23.0%. Based on results of YWHS-1, YWHS-2 aimed to sample  
16  
17 220 women to detect an estimated HIV prevalence of 23% (95% CI, 17.3%, 30.5%).  
18  
19  
20  
21  
22  
23

24 Recruitment and enrollment procedures were the same in both studies.<sup>5</sup> CWDA field  
25  
26 assistants provided study information and conducted eligibility screening via information  
27  
28 meetings in neighborhoods where sex work was prevalent. Eligible women were invited  
29  
30 to a community location used by various sex-worker organizations where study  
31  
32 information was described in more detail and informed consent was obtained. Enrolled  
33  
34 participants were given appointment cards to present to the YWHS clinic field-site and  
35  
36 free transportation was offered.  
37  
38  
39  
40  
41

### 42 **Data collection**

43 All data collection occurred at the YWHS clinic, which was staffed by a physician,  
44  
45 nurses, counselors and a laboratory technician. A structured questionnaire was  
46  
47 administered in Khmer by trained interviewers. Survey items were similar in both  
48  
49 studies, and covered socio-demographic characteristics, occupational and sexual risk  
50  
51 history, alcohol and drug use. HIV testing was conducted at each visit. In YWHS-1,  
52  
53 urine specimens were tested for Chlamydia trachomatis (CT) and *Neisseria gonorrhoea*  
54  
55 (GC). In YWHS-2, women were tested for HPV infection. STI treatment was provided at  
56  
57  
58  
59  
60

1 no cost, and women with HIV and HPV infection were referred to a local provider for  
2  
3  
4 free medical evaluation and treatment.  
5  
6  
7

### 8 **Laboratory testing**

9  
10 HIV serology was performed using two rapid tests; Uni-Gold Recombigen <sup>(TM)</sup> HIV rapid  
11  
12 HIV test (Trinity Biotech USA, Jamestown, NY) and the Clairview HIV 1/2 STAT-PAK  
13  
14 (Inverness Medical Diagnostics, Waltham, MA). HIV positive and discordant samples  
15  
16 were confirmed by HIV-1 immunoblot. CT and GC were assessed from urine samples  
17  
18 using BDProbeTec<sup>TM</sup> strand displacement amplification assay (Becton Dickinson, Sparks,  
19  
20 MD) at the NCHADS STD laboratory.<sup>5</sup> Cervical specimens for HPV testing were collected  
21  
22 using a standard cytobrush.<sup>47</sup> Client-centered risk reduction counseling was provided in  
23  
24 association with all testing.  
25  
26  
27  
28  
29  
30

### 31 **Ethical review**

32  
33 The study protocols were reviewed and approved by Institutional Review Board of the  
34  
35 Committee on Human Research at UCSF, the Cambodian National Ethics Committee,  
36  
37 and the University of New South Wales Human Research Ethics Committee in  
38  
39 accordance with ethical standards (institutional and national) and with the Helsinki  
40  
41 Declaration of 1975, as revised in 2000.  
42  
43  
44  
45  
46

### 47 **Measures**

48  
49 Both studies aimed to estimate HIV infection, ATS use, and sexual risk behavior and  
50  
51 included questions on sociodemographic factors, work history, income, and duration of  
52  
53 sex work, and whether they currently had an employer (manager, boss or supervisor).  
54  
55 Women were asked if they had ever and/or were currently working: as a beer promoter,  
56  
57 in a beer garden, as a waitress or hostess in a karaoke bar, nightclub or snooker bar, in  
58  
59  
60

1 a massage parlor, brothel, as a freelance sex worker using space at a brothel, as a  
2  
3 freelance sex worker in the park or on the street, or to specify 'other' location. They  
4  
5 were asked about age at first sex, number of partners (last month) and condom use  
6  
7 with last partners (paying and non-paying). Paying partners were defined as male  
8  
9 clients with whom respondents traded sex for money, goods or drugs. Condom use was  
10  
11 classified as "consistent" if the participant reported always using a condom. Participants  
12  
13 were asked about the number of days in which alcohol was drunk and the number of  
14  
15 days in which they were "affected" by alcohol or were "drunk" in the past month. ATS  
16  
17 use (ever and last 3 months) was assessed with questions regarding use of *yama* and  
18  
19 crystal (ice).  
20  
21  
22  
23  
24  
25

## 26 **Analyses**

27  
28 Prevalence estimates were calculated using exact binomial confidence intervals (CI).  
29  
30 Chi-square and Fisher's Exact Tests were used to examine differences in baseline socio-  
31  
32 demographic, occupational, sexual, and alcohol/drug use exposures and prevalent HIV  
33  
34 and STI between the two cohorts. The only longitudinal data compared was HIV  
35  
36 incidence, with the HIV incidence rate calculated using the number of seroconversions  
37  
38 per 100 person-years of observation (PYO) assuming a Poisson distribution. Analyses  
39  
40 were performed using STATA 9.0 (STATA, College Station, TX).  
41  
42  
43  
44  
45  
46

## 47 **Results**

48  
49 In YWHS-1, 285 women attended community information sessions, 161 (56%) eligible  
50  
51 women were recruited to the group information/consent meeting, and 160 (99%)  
52  
53 consented to participate. In YWHS-2, 220 (64%) women consented out of 345 who  
54  
55 attended information sessions. Sixty-seven women from YWHS-1 also enrolled in  
56  
57 YWHS-2; they were not included in the YWHS-2 comparison group, leaving 153 in the  
58  
59  
60

1 analysis. Table 1 shows baseline socio-demographic and occupational factors, as well as  
2 sexual and substance use risk exposures, in the two cohorts. The cohorts were similar  
3 with respect to age (median 25 years), and age of sexual debut (median 17 and 18  
4 years, respectively), but differed significantly in years of education and marital status.  
5 Compared to women in YWHS-1, women in YWHS-2 had more education (median of 5  
6 years (IQR 2,7) vs. 2 years (IQR 0,4)), and were more likely to be married or  
7 cohabitating with a partner (31.4% vs. 15%, respectively).  
8  
9

10 Women in YWHS-2 had been involved in sex work for significantly less time (median of  
11 3 years (IQR 1.7, 5)) than YWHS-1 women (median of 4.3 years (IQR 2.5, 6.3)). More  
12 YWHS-2 women were currently (last 30 days) working in entertainment venues and  
13 fewer in brothels, or as freelance FSW (including in parks, guest houses, or on the  
14 street). These differences were also reflected in the significantly higher proportion of  
15 YWHS-2 women who reported having a manager or boss (81.6%) compared to YWHS-1  
16 (46%). Figure 1 shows the distribution and range of work venues women reported 'ever'  
17 working in. Women in YWHS-2 also reported significantly fewer sexual partners in the  
18 past 30 days: a median of 5 compared to 30 in YWHS-1 (Table 1). Despite these  
19 differences, women in the two samples reported similar income distributions. Self-  
20 reported consistent condom use, with both paying and non-paying partners, did not  
21 differ between cohorts. Alcohol and ATS use differed significantly: women in YWHS-2  
22 reported more alcohol use, but fewer days drunk in the past month than in YWHS-1;  
23 and fewer women in YWHS-2 reported ever using ATS, although recent use was similar  
24 in both groups (Table 1). Both alcohol and ATS use varied by cohort and work venue:  
25 entertainment-based women in YWHS-2 reported less of both, whereas brothel and  
26 freelance-based women in YWHS-2 reported significantly more ATS use (Figure 2).  
27  
28  
29  
30  
31  
32  
33  
34  
35  
36  
37  
38  
39  
40  
41  
42  
43  
44  
45  
46  
47  
48  
49  
50  
51  
52  
53  
54  
55  
56  
57  
58  
59  
60



1 HIV prevalence was significantly ( $p < 0.01$ ) lower in women sampled in YWHS-2  
2  
3 compared to YWHS-1: 9.2% (95% CI 4.5%, 13.8%;  $p < 0.01$ ) vs. 23% (95% CI 16.5%,  
4  
5 29.7%) (Table 2). HIV incidence was also lower: 0.8/100 pyo (95% CI 0.1, 6.0) vs.  
6  
7 3.6/100 pyo (95% CI 1.2, 11.1), but not significantly ( $p = 0.26$ ). In YWHS-1, prevalence  
8  
9 of Chlamydia infection was 11.5% (95% CI 6.0%, 17.1%) and Gonorrhoea infection was  
10  
11 7.8% (95% CI 3.5%, 12.3%). Women in YWHS-2 were not tested for these STI, but  
12  
13 41.1% were HPV. HIV prevalence differed significantly by work venue and by cohort,  
14  
15 but over 30% of freelance-based women tested positive in both cohorts (Table 2).  
16  
17  
18 In both cohorts, 20% reported being tested for HIV in the past 3 months but more  
19  
20 YWHS-2 women had a history of testing (Table 3). More women in YWHS-1 reported not  
21  
22 knowing their HIV test results: 11 of the 84 women (13.1%) who reported being  
23  
24 negative tested positive and 4 of 12 women (33.3%) who reported they did not know  
25  
26 their previous HIV results tested positive. In YWHS-2, 5 of 114 (4.4%) who reported  
27  
28 testing negative, and 2 of 4 (50%) who did not know their previous results, tested  
29  
30 positive. Among women who reported no history of HIV testing, 31% (18/58) and  
31  
32 12.9% (4/31) tested HIV positive in YWHS-1 and -2, respectively.  
33  
34  
35  
36  
37  
38  
39  
40  
41

## 42 Discussion

43  
44 In these two samples of young FSW, recruited using the same eligibility criteria and  
45  
46 outreach methods, we observed important differences in socio-demographics, risk  
47  
48 exposures and HIV infection outcomes. Most notably, women sampled more recently  
49  
50 were more educated, had fewer sex partners, less time working in sex work and had  
51  
52 significantly lower prevalence of HIV. Where women worked was also very different in  
53  
54 the two cohorts: a much higher proportion of women sampled in 2009-10 compared to  
55  
56 2007-8 worked in entertainment-based establishments and fewer were brothel-based or  
57  
58  
59  
60



1  
2  
3  
4  
5  
6  
7  
8  
9  
10  
11  
12  
13  
14  
15  
16  
17  
18  
19  
20  
21  
22  
23  
24  
25  
26  
27  
28  
29  
30  
31  
32  
33  
34  
35  
36  
37  
38  
39  
40  
41  
42  
43  
44  
45  
46  
47  
48  
49  
50  
51  
52  
53  
54  
55  
56  
57  
58  
59  
60

freelance FSW. These differences point to the notable changes in sex work typology and environment that occurred following the enactment and enforcement in 2008 of anti-trafficking legislation in Cambodia<sup>16</sup>. Brothel closures and increases in policing have been acknowledged as a cause of significant social and occupational upheaval among FSW, driving many women, especially former brothel-based FSW, “underground”.<sup>10</sup> Both government agencies and NGOs in Phnom Penh have reported negative impacts of the legislation on FSW including: displacement and harassment and reduced access to condoms and health care.<sup>10 20 24</sup> In our qualitative research, women confirmed these impacts, describing how they moved to new venues or locales for sex work transactions including apartments or houses rented by brothel owners following brothel closures<sup>16</sup>, raising concerns about increased risks of HIV transmission as a result of the increasingly clandestine nature of direct sex work.

The differences in HIV prevalence, risk profiles, and sex work environments reported by these two samples are consistent with both quantitative and qualitative research demonstrating how socio-political and environmental factors can increase vulnerability to HIV among FSW.<sup>48-51</sup> The time period in which these two cohorts were sampled, corresponded with increased criminalization of sex work which impacted the number and settings of transactional sex. These shifts can have mixed effects. First, women engaged in entertainment-based work have lower risk profiles than women engaged in freelance sex work.<sup>5</sup> The shorter duration of sex work reported by entertainment-based FSW likely contributes to the lower HIV prevalence in this group. Protective effects of entertainment-based work may include having a boss or manager; odds of HIV among women who say they have a boss or manager are lower compared to women who do not (OR: 0.40; 95% CI 0.19, 0.90).<sup>5</sup> We also explored these factors in qualitative interviews with FSW.<sup>16</sup> Brothel and entertainment-based sex workers reported that the

1 'boss/manager" mitigated risk of violence from clients and problems with police. Also,  
2  
3 women working in entertainment establishments report earning up to three times more  
4  
5 (US \$50-\$60 or in \$200,000-\$240,000 Cambodian Riel) per client than women who  
6  
7 worked in brothels or streets and parks.<sup>16</sup> This is substantiated by the two cohorts'  
8  
9 report of similar income levels despite differences in the number of sex partners. It is  
10  
11 also possible that entertainment-based FW have lower risk partners than brothel-based  
12  
13 and freelance FSW. Despite the lower individual risk among this growing group of FSW,  
14  
15 there is potential for amplified population attributable risk for HIV, given the significant  
16  
17 increase in the population of women exposed to transactional sex as well as male  
18  
19 partners, who may also bridge to the general population.  
20  
21  
22  
23  
24  
25  
26

27 The two cohorts also showed differences in drug and alcohol use exposures. Our group  
28  
29 has identified ATS use as a significant independent risk factor for HIV related risk  
30  
31 behaviour including number of sex partners (Adjusted Risk Ratio (ARR): 1.49; 95% CI  
32  
33 1.0, 2.21) and incident STI (AOR: 5.41; 95% CI 1.15, 25.48)<sup>39</sup>. Alcohol use is also  
34  
35 emerging as a potential HIV-related risk factor<sup>16</sup>, although not well quantified among  
36  
37 FSW, especially those working in entertainment establishments (or their male partners).  
38  
39 Entertainment venues largely revolve around alcohol, and women working at these are  
40  
41 generally employed as hostesses, waitresses, or as "promoters" such as "beer  
42  
43 promotion girls" in a variety of venues.<sup>16 21</sup> Women who were working in the  
44  
45 entertainment sector were more likely to both report more days of drinking, and more  
46  
47 days intoxicated, than brothel or street-based FSW. Alcohol use can be a barrier to  
48  
49 effective condom use and condom negotiation in the transactional context.<sup>16 52</sup>  
50  
51 Consistent with this, we have shown that women who report heavy alcohol use are also  
52  
53 significantly more likely to report inconsistent condom use.<sup>39</sup> Given how entwined drug  
54  
55 and alcohol use are with sex work, especially in the growing entertainment-based  
56  
57  
58  
59  
60

1 sector, there is a significant need to better elucidate ways to mitigate HIV-associated  
2 risks among women whose livelihood depends on working in these establishments.  
3  
4 Designing and implementing prevention in these contexts will require input, not only  
5  
6 from working women, but also from the wider business sector, as well as male clients.<sup>48</sup>  
7  
8

9  
10 53-56  
11

12  
13  
14  
15 The differences in HIV and risk profiles between the women in our two samples, as well  
16 as outreach efforts by HIV prevention organizations, may be a result of reaching “low  
17 hanging fruit” resulting from both substantive increases in the number of women  
18 working in entertainment establishments, and the increased challenges of engaging  
19 women with higher risk and who are HIV infected for the reasons described above. FSW  
20 in Phnom Penh have historically been easily accessed for prevention and surveillance  
21 efforts. However, recent changes in the sex work landscape suggest that alternative  
22 sampling methods, such as respondent driven sampling, may result in better access to  
23 higher risk women who are more hidden and therefore hard to reach in this new legal  
24 climate.<sup>57</sup>  
25  
26  
27  
28  
29  
30  
31  
32  
33  
34  
35  
36  
37  
38  
39

40 HIV prevention remains an important and essential priority for all women engaged in  
41 transactional sex. A recent systematic review confirms that FSW in Asia have the  
42 highest odds of infection compared to women of reproductive age in the general  
43 population.<sup>58</sup> In addition to new structural interventions aimed at reducing risk in the  
44 work-based environment, the very high prevalence and risk of HIV among FSW in  
45 Cambodia suggests a need for combination HIV prevention interventions including  
46 biomedical (pre-exposure prophylaxis, microbicides, and treatment as prevention),  
47 behavioural and development approaches (such as microfinance or income generating  
48 opportunities).<sup>59-64</sup>  
49  
50  
51  
52  
53  
54  
55  
56  
57  
58  
59  
60

1  
2  
3  
4 Several limitations of these analyses should be noted. First results presented here are  
5  
6 cross-sectional and thus associations do not reflect causality. The comparison of the  
7  
8 serial samples is ecological in nature and does not prove temporal effects. The sample  
9  
10 sizes are small and thus subject to limitations with respect to generalizability. Many  
11  
12 exposures are self-reported and thus may reflect social desirability bias, especially  
13  
14 condom use which we have found has been over-reported based on biomarker data.<sup>65</sup>  
15  
16 On the other hand, we have found that self-reported ATS use is accurate compared to  
17  
18 urine toxicology screening, suggesting that measures of drug and alcohol use in this  
19  
20 group are accurate.<sup>66</sup>  
21  
22  
23  
24  
25  
26

27 Results from this analysis provide important insights into recent shifts in the context of  
28  
29 sex work and risk in young FSW in Phnom Penh and highlight the challenges to HIV  
30  
31 prevention in this environment. Conflicting trends, including the criminalization and  
32  
33 suppression of direct sex work while the indirect entertainment-based sex work industry  
34  
35 is flourishing, set a new stage. Unless there is acknowledgment and access to women  
36  
37 who are more directly engaged in sex work, these women will be poorly represented in  
38  
39 any national HIV or behavioural surveillance. They will remain hidden and stigmatized,  
40  
41 subject to repression, violence and potentially with less access to prevention or care.  
42  
43 While the 100% condom use program had its criticisms, that policy at least  
44  
45 acknowledged the existence and need for HIV prevention at a multisectoral level for  
46  
47 FSW. The current socio-political climate has potentially reversed these benefits, by  
48  
49 denying the existence of FSW. The exponential growth of entertainment-based sex work  
50  
51 has the potential to result in an expanding HIV epidemic among young women in  
52  
53 Cambodia. From a programmatic perspective entertainment-based FSW are much easier  
54  
55 to reach but likely require different HIV prevention interventions than the 100% condom  
56  
57  
58  
59  
60

1 use program. Implementation of research and programmatic efforts that integrate  
2 health, social empowerment, and safe work environments for HIV prevention remain a  
3 high priority for women engaged in sex work in Cambodia.<sup>67</sup>  
4  
5  
6  
7  
8  
9

## 10 **Funding**

11 Funded by U.S. National Institutes of Health.

## 12 **Competing Interests**

13 None

## 14 **Contributorship**

15 All authors contributed to the design and implementation of the YWHS-1 and -2 studies. Authors KP,  
16 ES, JE, and LM compiled the first draft of the manuscript, which was reviewed by NS, M-CC, KS,  
17 MC, JM\_S, PP, JK. The primary statistical analysis was conducted by JE and M-CC; KS and MC  
18 provided supplemental data review, and KP reviewed all data analyses. All authors contributed to and  
19 have approved the final manuscript. The YWHS Collaborative is a steering committee who reviewed  
20 and approved the study protocols, and provided expertise into some or all of the studies' methods and  
21 implementation.  
22  
23  
24  
25  
26  
27  
28  
29  
30  
31  
32  
33  
34  
35  
36  
37

## 38 **Data sharing**

39 No additional data are available.  
40  
41  
42  
43  
44  
45  
46  
47  
48  
49  
50  
51  
52  
53  
54  
55  
56  
57  
58  
59  
60

## References

1. NCHADS. Ministry of Health National Center for HIV, AIDS, Dermatology and STDs. Annual Report 2009: National Centre for HIV/AIDS, Dermatology and STDs, Cambodia; <http://www.nchads.org/report.php>; Accessed July 8, 2011, 2011.
2. Saphonn V, Sopheab H, Sun LP, Vun MC, Wantha SS, Gorbach PM, et al. Current HIV/AIDS/STI epidemic: intervention programs in Cambodia, 1993-2003. *AIDS Educ Prev* 2004;16(3 Suppl A):64-77.
3. NCHADS. Behavioral Sentinel Surveillance 2010. *Cambodia National Center for HIV, AIDS, Dermatology and STD Dissemination Conference, December 30, 2010* 2011.
4. NCHADS. Ministry of Health National Center for HIV, AIDS, Dermatology and STDs. Estimation of the HIV prevalence among the general population in Cambodia. : National Centre for HIV/AIDS, Dermatology and STDs, Cambodia; <http://www.nchads.org/index.php?id=20&event=146> Accessed July 8, 2011, 2011.
5. Couture MC, Sansothy N, Saphonn V, Phal S, Sichan K, Stein E, et al. Young women engaged in sex work in Phnom Penh, Cambodia, have high incidence of HIV and sexually transmitted infections, and amphetamine-type stimulant use: new challenges to HIV prevention and risk. *Sex Transm Dis* 2011;38(1):33-9.
6. Sopheab H, Saphonn V, Chhea C, Fylkesnes K. Distribution of HIV in Cambodia: findings from the first national population survey. *AIDS* 2009;23(11):1389-95.
7. Sopheab H, Morineau G, Neal JJ, Saphonn V, Fylkesnes K. Sustained high prevalence of sexually transmitted infections among female sex workers in Cambodia: high turnover seriously challenges the 100% Condom Use Programme. *BMC Infect Dis* 2008;8:167.
8. Sopheab H, Gorbach PM, Gloyd S, Leng HB. Rural sex work in Cambodia: work characteristics, risk behaviours, HIV, and syphilis. *Sex Transm Infect* 2003;79(4):e2.
9. Saphonn V, Parekh BS, Dobbs T, Mean C, Bun LH, Ly SP, et al. Trends of HIV-1 Seroincidence Among HIV-1 Sentinel Surveillance Groups in Cambodia, 1999-2002. *J Acquir Immune Defic Syndr* 2005;39(5):587-92.
10. UNAIDS. Cambodia Country Progress Report: Monitoring the Progress towards the Implementation of the Declaration of Commitment on HIV and AIDS. Reporting period: January 2010-December 2011. Prepared by National AIDS Authority for United Nations General Assembly Special Session (UNGASS). . <http://www.unaids.org/en/regionscountries/countries/cambodia/> Accessed December 28, 2012.
11. UNAIDS. HIV in Asia and the Pacific: Getting to Zero. [http://www.unaids.org/en/media/unaids/contentassets/documents/unaidspublication/2011/20110826\\_APGettingToZero\\_en.pdf](http://www.unaids.org/en/media/unaids/contentassets/documents/unaidspublication/2011/20110826_APGettingToZero_en.pdf) 2011;Accessed December 20, 2011.
12. Samnang P, Leng HB, Kim A, Canchola A, Moss A, Mandel JS, et al. HIV prevalence and risk factors among fishermen in Sihanouk Ville, Cambodia. *Int J STD AIDS* 2004;15(7):479-83.
13. Nishigaya K. Female garment factory workers in Cambodia: migration, sex work and HIV/AIDS. *Women Health* 2002;35(4):27-42.
14. Patterson D. Southeast Asia: national policy audits on HIV and migration. *HIV AIDS Policy Law Rev* 2005;10(3):31, 33.
15. Hor LB, Detels R, Heng S, Mun P. The role of sex worker clients in transmission of HIV in Cambodia. *Int J STD AIDS* 2005;16(2):170-4.



- 1 16. Maher L, Mooney-Somers J, Phlong P, Couture MC, Stein E, Evans J, et al. Selling  
2 sex in unsafe spaces: Sex work risk environments in Phnom Penh, Cambodia.  
3 *Harm Reduct J* 2011;8(1):30.
- 4 17. Plummer R. The sex industry in Cambodia: the traffic police. . *The Economist* June  
5 11, 2009.
- 6 18. UNIAP. United Nations Inter-Agency Project on Human Trafficking (Phase III).  
7 Cambodia: Exodus to the sex trade? Effects of the global financial crisis on  
8 women's working conditions and opportunities. *Report* [http://www.no-  
10 trafficking.org/reports\\_docs/siren/siren\\_cb-04.pdf](http://www.no-<br/>9 trafficking.org/reports_docs/siren/siren_cb-04.pdf); Accessed August 31, 2009.
- 11 19. UNAIDS pr. More women in Cambodia turning to sex trade amid financial crisis – UN  
12 report.  
13 [http://www.un.org/apps/news/story.asp?NewsID=31541&Cr=human+trafficking  
15 &Cr1=](http://www.un.org/apps/news/story.asp?NewsID=31541&Cr=human+trafficking<br/>14 &Cr1=) 2009.
- 16 20. KHANA. Mapping the pattern of sex workers, entertainment establishments, and  
17 men who have sex with men in Cambodia. Accessed July 9, 2011. Report by Hor  
18 Bun Leng, M.D, and Tuot Sovaranny, March. 2008.
- 19 21. Kim AA, Sun LP, Chhorvann C, Lindan C, Van Griensven F, Kilmarx PH, et al. High  
20 prevalence of HIV and sexually transmitted infections among indirect sex workers  
21 in Cambodia. *Sex Transm Dis* 2005;32(12):745-51.
- 22 22. Gorbach PM, Sopheab H, Chhorvann C, Weiss RE, Vun MC. Changing behaviors and  
23 patterns among Cambodian sex workers: 1997-2003. *Journal of Acquired  
24 Immune Deficiency Syndromes* 2006;42(2):242-7.
- 25 23. Ghys PD, Jenkins C, Pisani E. HIV surveillance among female sex workers. *Aids*  
26 2001;15 Suppl 3:S33-40.
- 27 24. Francis C. HIV prevention and anti-trafficking in conflict? The public health  
28 consequences of Cambodia's fight against trafficking. FHI (in collaboration with  
29 PSI, Care, UNAIDS); December 2008.
- 30 25. FHI. SMARTgirl Program to Reduce Risk and Inspire Behavior Change. .  
31 [http://www.fhi.org/en/CountryProfiles/Cambodia/res\\_SMARTgirl.htm](http://www.fhi.org/en/CountryProfiles/Cambodia/res_SMARTgirl.htm) Accessed  
32 July 15th, 2011.
- 33 26. Burke KP, Munshaw S, Osburn WO, Levine J, Liu L, Sidney J, et al. Immunogenicity  
34 and cross-reactivity of a representative ancestral sequence in hepatitis C virus  
35 infection. *J Immunol* 2012;188(10):5177-88.
- 36 27. Lamptey PR. Reducing heterosexual transmission of HIV in poor countries. *Bmj  
37 Clinical Research Ed.* 2002;324(7331):207-11.
- 38 28. UNODC. Patterns and Trends of Amphetamine Type Stimulants and other drugs;  
39 Asia and the Pacific. *The Global SMART Programme (Synthetics Monitoring:  
40 Analyses, Reporting, Trends)*  
41 <http://www.unodc.org/unodc/en/scientists/smart.html> (Accessed January 5,  
42 2012) 2011.
- 43 29. Ahmad K. Increased use of amphetamine-type stimulants threatens east Asian  
44 countries. *Lancet* 2002;359(9321):1927.
- 45 30. Ahmad K. Asia grapples with spreading amphetamine abuse. *Lancet*  
46 2003;361(9372):1878-9.
- 47 31. Kulsudjarit K. Drug problem in southeast and southwest Asia. *Ann N Y Acad Sci*  
48 2004;1025:446-57.
- 49 32. Farrell M, Marsden J, Ali R, Ling W. Methamphetamine: drug use and psychoses  
50 becomes a major public health issue in the Asia Pacific region. *Addiction*  
51 2002;97(7):771-2.
- 52  
53  
54  
55  
56  
57  
58  
59  
60

- 1 33. Mongkolsirichaikul D, Mokkhavesa C, Ratanabanangkoon K. The incidence of  
2 amphetamine use among truck drivers from various regions of Thailand. *J Med*  
3 *Assoc Thai* 1988;71(9):471-4.
- 4 34. Vongsheree S, Sri-Ngam P, Ruchusatsawat N, Thaisri H, Puangtabtim W,  
5 Phutiprawan T, et al. High HIV-1 prevalence among metamphetamine users in  
6 central Thailand, 1999-2000. *J Med Assoc Thai* 2001;84(9):1263-7.
- 7 35. Dayrit FM, Dumlao MC. Impurity profiling of methamphetamine hydrochloride drugs  
8 seized in the Philippines. *Forensic Sci Int* 2004;144(1):29-36.
- 9 36. Lin SK, Ball D, Hsiao CC, Chiang YL, Ree SC, Chen CK. Psychiatric comorbidity and  
10 gender differences of persons incarcerated for methamphetamine abuse in  
11 Taiwan. *Psychiatry Clin Neurosci* 2004;58(2):206-12.
- 12 37. Lua AC, Lin HR, Tseng YT, Hu AR, Yeh PC. Profiles of urine samples from  
13 participants at rave party in Taiwan: prevalence of ketamine and MDMA abuse.  
14 *Forensic Sci Int* 2003;136(1-3):47-51.
- 15 38. Razak MH, Jittiwutikarn J, Suriyanon V, Vongchak T, Srirak N, Beyrer C, et al. HIV  
16 prevalence and risks among injection and noninjection drug users in northern  
17 Thailand: need for comprehensive HIV prevention programs. *J Acquir Immune*  
18 *Defic Syndr* 2003;33(2):259-66.
- 19 39. Couture MC, Evans JL, Sothy NS, Stein ES, Sichan K, Maher L, et al. Correlates of  
20 amphetamine-type stimulant use and associations with HIV-related risks among  
21 young women engaged in sex work in Phnom Penh, Cambodia. *Drug Alcohol*  
22 *Depend* 2012;120(1-3):119-26.
- 23 40. Melbye K, Khamboonruang C, Kunawararak P, Celentano DD, Prapamontol T, Nelson  
24 KE, et al. Lifetime correlates associated with amphetamine use among northern  
25 Thai men attending STD and HIV anonymous test sites. *Drug Alcohol Depend*  
26 2002;68(3):245-53.
- 27 41. Sattah MV, Supawitkul S, Dondero TJ, Kilmarx PH, Young NL, Mastro TD, et al.  
28 Prevalence of and risk factors for methamphetamine use in northern Thai youth:  
29 results of an audio-computer-assisted self-interviewing survey with urine testing.  
30 *Addiction* 2002;97(7):801-8.
- 31 42. Buavirat A, Page-Shafer K, van Griensven GJ, Mandel JS, Evans J, Chuaratanaphong  
32 J, et al. Risk of prevalent HIV infection associated with incarceration among  
33 injecting drug users in Bangkok, Thailand: case-control study. *BMJ*  
34 2003;326(7384):308.
- 35 43. Beyrer C, Razak MH, Jittiwutikarn J, Suriyanon V, Vongchak T, Srirak N, et al.  
36 Methamphetamine users in northern Thailand: changing demographics and risks  
37 for HIV and STD among treatment-seeking substance abusers. *Int J STD AIDS*  
38 2004;15(10):697-704.
- 39 44. Vanichseni S, Tappero JW, Pitisuttithum P, Kitayaporn D, Mastro TD, Vimutisunthorn  
40 E, et al. Recruitment, screening and characteristics of injection drug users  
41 participating in the AIDS-VAX B/E HIV vaccine trial, Bangkok, Thailand. *Aids*  
42 2004;18(2):311-6.
- 43 45. Maher L, Phlong P, Mooney-Somers J, Keo S, Stein E, Couture MC, et al.  
44 Amphetamine-type stimulant use and HIV/STI risk behaviour among young  
45 female sex workers in Phnom Penh, Cambodia. *Int J Drug Policy* 2011;22(3):203-  
46 9.
- 47 46. Kab V, Evans J, Sansothy N, Stein E, Couture M-C, Maher L, et al. Testing for  
48 amphetamine-type stimulant (ATS) use to ascertain validity of self-reported ATS  
49 use among young female sex workers in Cambodia. *Masters Thesis for University*  
50 *of California Berkeley, School of Public Health, MPH in Epidemiology and*  
51 *Biostatistics. Completed May 15, 2011.*
- 52
- 53
- 54
- 55
- 56
- 57
- 58
- 59
- 60



- 1 47. Chattergoon MA, Levine JS, Latanich R, Osburn WO, Thomas DL, Cox AL. High  
2 plasma interleukin-18 levels mark the acute phase of hepatitis C virus infection. *J*  
3 *Infect Dis* 2011;204(11):1730-40.
- 4 48. Yang C, Latkin C, Luan R, Nelson K. Condom use with female sex workers among  
5 male clients in Sichuan Province, China: the role of interpersonal and venue-level  
6 factors. *J Urban Health* 2010;87(2):292-303.
- 7 49. Erasquin JT, Reed E, Blankenship KM. Police-related experiences and HIV risk  
8 among female sex workers in Andhra Pradesh, India. *J Infect Dis* 2011;204 Suppl  
9 5:S1223-8.
- 10 50. Shannon K, Kerr T, Allinott S, Chettiar J, Shoveller J, Tyndall MW. Social and  
11 structural violence and power relations in mitigating HIV risk of drug-using  
12 women in survival sex work. *Soc Sci Med* 2008;66(4):911-21.
- 13 51. Shannon K, Kerr T, Strathdee SA, Shoveller J, Montaner JS, Tyndall MW. Prevalence  
14 and structural correlates of gender based violence among a prospective cohort of  
15 female sex workers. *BMJ* 2009;339:b2939.
- 16 52. Kalichman SC, Simbayi LC, Kaufman M, Cain D, Jooste S. Alcohol use and sexual  
17 risks for HIV/AIDS in sub-Saharan Africa: systematic review of empirical findings.  
18 *Prev Sci* 2007;8(2):141-51.
- 19 53. Morisky DE, Chiao C, Ksobiech K, Malow RM. Reducing alcohol use, sex risk  
20 behaviors, and sexually transmitted infections among Filipina female bar workers:  
21 effects of an ecological intervention. *J Prev Interv Community* 2010;38(2):104-  
22 17.
- 23 54. Surratt HL, Inciardi JA. An effective HIV risk-reduction protocol for drug-using  
24 female sex workers. *J Prev Interv Community* 2010;38(2):118-31.
- 25 55. Argento E, Reza-Paul S, Lorway R, Jain J, Bhagya M, Fathima M, et al. Confronting  
26 structural violence in sex work: lessons from a community-led HIV prevention  
27 project in Mysore, India. *Aids Care* 2011;23(1):69-74.
- 28 56. Reza-Paul S, Beattie T, Syed HU, Venukumar KT, Venugopal MS, Fathima MP, et al.  
29 Declines in risk behaviour and sexually transmitted infection prevalence following  
30 a community-led HIV preventive intervention among female sex workers in  
31 Mysore, India. *Aids* 2008;22 Suppl 5:S91-100.
- 32 57. Johnston LG, Sabin K, Mai TH, Pham TH. Assessment of respondent driven sampling  
33 for recruiting female sex workers in two Vietnamese cities: reaching the unseen  
34 sex worker. *J Urban Health* 2006;83(6 Suppl):i16-28.
- 35 58. Baral S, Beyrer C, Muessig K, Poteat T, Wirtz AL, Decker MR, et al. Burden of HIV  
36 among female sex workers in low-income and middle-income countries: a  
37 systematic review and meta-analysis. *Lancet Infect Dis* 2012;12(7):538-49.
- 38 59. Merson M, Padian N, Coates TJ, Gupta GR, Bertozzi SM, Piot P, et al. Combination  
39 HIV prevention. *Lancet* 2008;372(9652):1805-6.
- 40 60. Abdool Karim Q, Abdool Karim SS, Frohlich JA, Grobler AC, Baxter C, Mansoor LE, et  
41 al. Effectiveness and safety of tenofovir gel, an antiretroviral microbicide, for the  
42 prevention of HIV infection in women. *Science* 2010;329(5996):1168-74.
- 43 61. Grant RM, Lama JR, Anderson PL, McMahan V, Liu AY, Vargas L, et al. Preexposure  
44 chemoprophylaxis for HIV prevention in men who have sex with men. *N Engl J*  
45 *Med* 2010;363(27):2587-99.
- 46 62. Dworkin SL, Blankenship K. Microfinance and HIV/AIDS prevention: assessing its  
47 promise and limitations. *AIDS Behav* 2009;13(3):462-9.
- 48 63. Pronyk PM, Kim JC, Abramsky T, Phetla G, Hargreaves JR, Morison LA, et al. A  
49 combined microfinance and training intervention can reduce HIV risk behaviour in  
50 young female participants. *AIDS* 2008;22(13):1659-65.
- 51
- 52
- 53
- 54
- 55
- 56
- 57
- 58
- 59
- 60

- 1  
2  
3  
4  
5  
6  
7  
8  
9  
10  
11  
12  
13  
14  
15  
16  
17  
18  
19  
20  
21  
22  
23  
24  
25  
26  
27  
28  
29  
30  
31  
32  
33  
34  
35  
36  
37  
38  
39  
40  
41  
42  
43  
44  
45  
46  
47  
48  
49  
50  
51  
52  
53  
54  
55  
56  
57  
58  
59  
60
64. Rosenberg MS, Seavey BK, Jules R, Kershaw TS. The Role of a Microfinance Program on HIV Risk Behavior Among Haitian Women. *AIDS Behav* 2011;15(5):911-8.
65. Evans J, Couture M-C, Stein ES, Sansothy N, Maher L, Page K, et al. Biomarker validation of recent unprotected sexual intercourse in a prospective study of young women engaged in sex work in Phnom Penh, Cambodia. *STD* in press.
66. Kab V, Evans J, Sansothy N, Stein E, Couture M-C, Maher L, et al. Testing for amphetamine-type stimulant (ATS) use to ascertain validity of self-reported ATS use among young female sex workers in Cambodia. . *Addiction Science & Clinical Practice* 2012;7:11-25.
67. Tucker JD, Tuminez AS. Reframing the interpretation of sex worker health: a behavioral-structural approach. *J Infect Dis* 2011;204 Suppl 5:S1206-10.

**Table 1: Selected socio-demographic characteristics, occupational, and risk exposures in two cohorts of high risk young women in Phnom Penh, Cambodia: YWHS-1 (2006-2007) and YWHS-2 (2009-2010)**

| Characteristic                                           | YWHS-1<br>N=160              |      | YWHS-2<br>N=153*             |      | p-value |
|----------------------------------------------------------|------------------------------|------|------------------------------|------|---------|
|                                                          | Prevalence of characteristic |      | Prevalence of characteristic |      |         |
|                                                          | N                            | %    | N                            | %    |         |
| <b>Age (years, median (IQR))</b>                         | 25 (21 – 27)                 |      | 25 ( 22 – 28)                |      | 0.56    |
| 16-18                                                    | 13                           | 8.1  | 11                           | 7.2  | 0.86    |
| 19-24                                                    | 64                           | 40.0 | 58                           | 37.9 |         |
| 25-29                                                    | 83                           | 51.8 | 84                           | 54.9 |         |
| <b>Marital status</b>                                    |                              |      |                              |      |         |
| Never married                                            | 57                           | 35.6 | 38                           | 24.8 | <0.01   |
| Married-living together                                  | 24                           | 15.0 | 48                           | 31.4 |         |
| Widowed/Divorced/Separated                               | 79                           | 49.4 | 67                           | 43.8 |         |
| <b>Education (years)</b>                                 |                              |      |                              |      |         |
| None                                                     | 64                           | 40.0 | 23                           | 15.0 | <0.01   |
| Primary (1-6 years)                                      | 82                           | 51.3 | 91                           | 59.5 |         |
| Secondary (7+ years)                                     | 14                           | 8.8  | 39                           | 25.5 |         |
| <b>Age at first sex (median (IQR))</b>                   | 17 (16 – 18)                 |      | 18 ( 16 – 19)                |      | 0.03    |
| ≤ 15                                                     | 32                           | 20.1 | 22                           | 14.5 | 0.19    |
| > 15                                                     | 127                          | 79.9 | 130                          | 85.5 |         |
| <b>Length of employment as FSW (years, median (IQR))</b> | 4.3 (2.5 – 6.3)              |      | 3 (1.7 – 5)                  |      | <0.01   |
| <b>Current employment venue (last 30 days)</b>           |                              |      |                              |      |         |
| Entertainment                                            | 51                           | 31.9 | 113                          | 74.3 | <0.01†  |
| Brothel                                                  | 23                           | 9.2  | 3                            | 2.0  |         |
| Freelance                                                | 59                           | 39.3 | 29                           | 19.1 |         |
| Other/Multiple                                           | 27                           | 16.9 | 7                            | 4.6  |         |
| <b>Have a manager, boss or supervisor</b>                |                              |      |                              |      |         |
| No                                                       | 82                           | 53.6 | 28                           | 14.4 | <0.01   |
| Yes                                                      | 71                           | 46.4 | 124                          | 81.6 |         |
| <b>Income in past month (US \$)</b>                      |                              |      |                              |      |         |
| Less than \$100                                          | 68                           | 42.5 | 50                           | 32.9 | 0.18    |
| 100-150\$                                                | 35                           | 21.9 | 43                           | 29.3 |         |

|                                                            |              |      |             |      |       |
|------------------------------------------------------------|--------------|------|-------------|------|-------|
| Over 150\$                                                 | 57           | 35.6 | 59          | 38.8 |       |
|                                                            |              |      |             |      |       |
| <b>Number of sex partners in last month (median (IQR))</b> | 30 (10 – 90) |      | 5 (3 – 13)  |      | <0.01 |
| ≤10                                                        | 45           | 28.1 | 112         | 73.2 | <0.01 |
| 11 – 50                                                    | 53           | 33.1 | 41          | 26.8 |       |
| > 50                                                       | 62           | 38.8 | 0           | 0    |       |
|                                                            |              |      |             |      |       |
| <b>Condom use with last paying partner</b>                 |              |      |             |      |       |
| Consistent (always)                                        | 108          | 85.7 | 86          | 87.8 | 0.66  |
| Inconsistent                                               | 18           | 14.3 | 12          | 12.2 |       |
|                                                            |              |      |             |      |       |
| <b>Condom use with last non paying partner</b>             |              |      |             |      |       |
| Consistent (always)                                        | 7            | 20.6 | 10          | 18.2 | 0.78  |
| Inconsistent                                               | 27           | 79.4 | 45          | 81.8 |       |
|                                                            |              |      |             |      |       |
| <b>Number of days drink alcohol (last month)</b>           | 15 (2 – 30)  |      | 18 (5 – 28) |      | 0.76  |
| 0 – 4                                                      | 65           | 40.6 | 36          | 23.5 | <0.01 |
| 5 – 19                                                     | 25           | 15.6 | 42          | 27.5 |       |
| ≥ 20                                                       | 70           | 43.7 | 75          | 49.0 |       |
|                                                            |              |      |             |      |       |
| <b>Number of days drunk (last month)</b>                   | 5 (1 – 20)   |      | 3 (1 – 10)  |      | 0.07  |
| 0 – 4                                                      | 89           | 55.6 | 86          | 56.2 | <0.01 |
| 5 – 19                                                     | 33           | 20.6 | 50          | 32.7 |       |
| ≥ 20                                                       | 38           | 23.7 | 17          | 11.1 |       |
|                                                            |              |      |             |      |       |
| <b>ATS use (ever)</b>                                      |              |      |             |      |       |
| No                                                         | 92           | 57.5 | 107         | 69.9 | 0.02  |
| Yes                                                        | 68           | 42.5 | 46          | 30.1 |       |
|                                                            |              |      |             |      |       |
| <b>ATS use (last 3 months)</b>                             |              |      |             |      |       |
| No                                                         | 116          | 73.4 | 117         | 76.5 | 0.54  |
| Yes                                                        | 42           | 26.6 | 36          | 23.5 |       |
|                                                            |              |      |             |      |       |
| <b>Ever used any drug prior to/during sex</b>              |              |      |             |      |       |
| No                                                         | 109          | 68.1 | 117         | 76.5 | 0.10  |
| Yes                                                        | 51           | 31.9 | 36          | 23.5 |       |
|                                                            |              |      |             |      |       |

\* Excludes women who participated in YWHS-1

†Fisher Exact p-value

1  
2  
3  
4  
5  
6  
7  
8  
9  
10  
11  
12  
13  
14  
15  
16  
17  
18  
19  
20  
21  
22  
23  
24  
25  
26  
27  
28  
29  
30  
31  
32  
33  
34  
35  
36  
37  
38  
39  
40  
41  
42  
43  
44  
45  
46  
47  
48  
49  
50  
51  
52  
53  
54  
55  
56  
57  
58  
59  
60

**Table 2: HIV prevalence overall and by current work venue in two cohorts of young high risk women in Phnom Penh, Cambodia: YWHS-1 (2006-2007) and YWHS-2 (2009-2010)**

| Characteristic                                | YWHS-1<br>N=160 |                    | YWHS-2*<br>N=153* |                    | p-value |
|-----------------------------------------------|-----------------|--------------------|-------------------|--------------------|---------|
|                                               | N               | % (95% CI)         | N                 | %                  |         |
| <b>HIV positive</b>                           | 37              | 23.1 (16.5 – 29.7) | 14                | 9.2 (4.5 – 13.8)   | <0.01   |
| <b>HIV positive by employment venue (n/N)</b> |                 |                    |                   |                    |         |
| Entertainment                                 | 5/51            | 9.8 (1.5 – 18.1)   | 5/113             | 4.4 (0.6 – 8.2)    | <0.01   |
| Brothel                                       | 4/23            | 17.4 (1.5 – 33.3)  | 0/3               | 0                  |         |
| Freelance                                     | 22/59           | 37.3 (25.0 – 48.0) | 9/29              | 31.0 (13.8 – 48.2) |         |
| Other/Multiple                                | 6/27            | 22.2 (6.2 – 38.3)  | 0/7               | 0                  |         |

\* Excludes women who participated in YWHS-1

**Table 3: HIV testing history and behaviors in two cohorts of young high risk women in Phnom Penh, Cambodia: YWHS-1 (2006-2007) and YWHS-2 (2009-2010)**

| Characteristic                            | YWHS-1<br>N=160 |      | YWHS-2*<br>N=153* |      | p-value |
|-------------------------------------------|-----------------|------|-------------------|------|---------|
|                                           | N               | %    | N                 | %    |         |
| <b>Ever tested for HIV</b>                |                 |      |                   |      |         |
| No                                        | 58              | 36.5 | 31                | 20.3 | <0.01   |
| Yes                                       | 101             | 63.5 | 122               | 79.7 |         |
| <b>HIV test in last 3 months</b>          |                 |      |                   |      |         |
| No                                        | 126             | 79.3 | 119               | 77.8 | 0.75    |
| Yes                                       | 33              | 20.7 | 34                | 22.2 |         |
| <b>What was result of last HIV test?#</b> |                 |      |                   |      |         |
| Negative                                  | 84              | 84.0 | 114               | 93.4 | 0.04    |
| Positive                                  | 4               | 4.0  | 4                 | 3.3  |         |
| Don't know                                | 12              | 12.0 | 4                 | 3.3  |         |
| <b>Where received last HIV test#</b>      |                 |      |                   |      |         |
| Public hospital                           | 35              | 34.7 | 55                | 34.0 | 0.10    |
| Voluntary testing and counseling center   | 1               | 1.0  | 0                 | 0    |         |
| NGO clinic                                | 59              | 58.4 | 54                | 44.3 |         |
| Private hospital, clinic, or laboratory   | 6               | 5.9  | 13                | 10.7 |         |

\* Excludes women who participated in YWHS-1

# Among those who reported being previously tested for HIV

## Figure Legend

Figure 1: Venues where women in YWHS-2 and YWHS-2 reported ever working

Figure 2. Alcohol use in the past month and ATS use in the past 3 months reported by women in YWHS-1 and YWHS-2 by work venue: (A) Entertainment-based; (B) Brothel-based; (C) Freelance

For peer review only

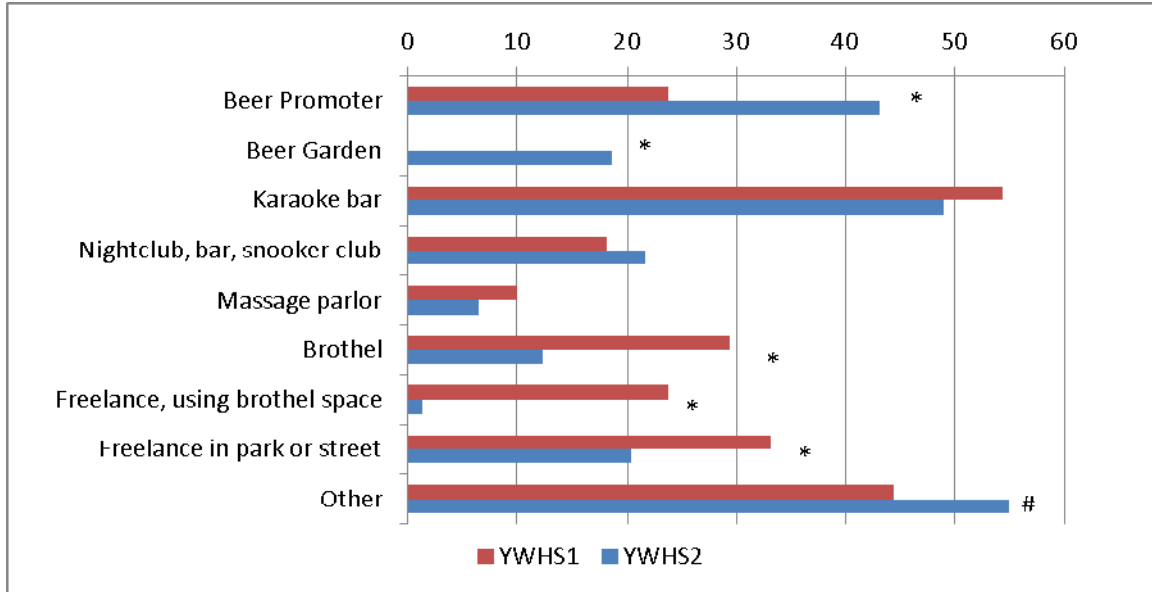

\* p≤0.05; # p=0.06

Peer review only

1  
2  
3  
4  
5  
6  
7  
8  
9  
10  
11  
12  
13  
14  
15  
16  
17  
18  
19  
20  
21  
22  
23  
24  
25  
26  
27  
28  
29  
30  
31  
32  
33  
34  
35  
36  
37  
38  
39  
40  
41  
42  
43  
44  
45  
46  
47  
48  
49  
50  
51  
52  
53  
54  
55  
56  
57  
58  
59  
60



1  
2  
3  
4  
5  
6  
7  
8  
9  
10  
11  
12  
13  
14  
15  
16  
17  
18  
19  
20  
21  
22  
23  
24  
25  
26  
27  
28  
29  
30  
31  
32  
33  
34  
35  
36  
37  
38  
39  
40  
41  
42  
43  
44  
45  
46  
47  
48  
49  
50  
51  
52  
53  
54  
55  
56  
57  
58  
59  
60

For peer review only

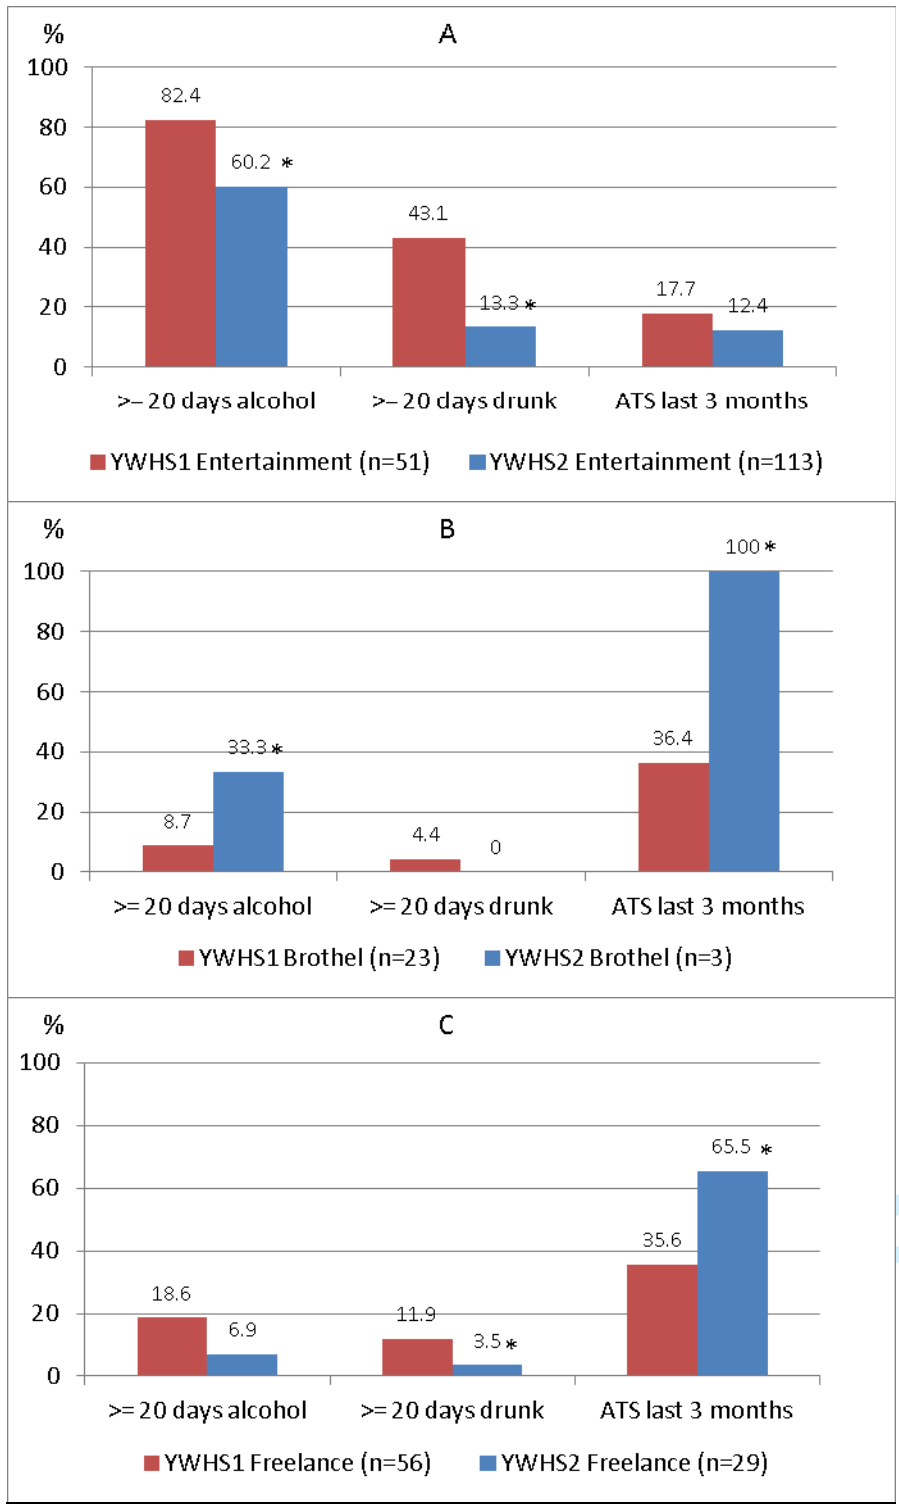

\*p<0.05

STROBE Statement—Checklist of items that should be included in reports of *cohort studies*

**Page et al., Sex work and HIV in Cambodia: trajectories of risk and disease in two cohorts of high risk young women in Phnom Penh, Cambodia**

|                              | Item No | Item, Section and PAGE NUMBER                                                                                                                                                                                                                                                                                                                                                                                                                                                                                                               |
|------------------------------|---------|---------------------------------------------------------------------------------------------------------------------------------------------------------------------------------------------------------------------------------------------------------------------------------------------------------------------------------------------------------------------------------------------------------------------------------------------------------------------------------------------------------------------------------------------|
| <b>Title and abstract</b>    | 1       | (a) Study's design with a commonly used terms – PAGE 1<br>(b) Provide in the abstract an informative and balanced summary of what was done and what was found – PAGE 3                                                                                                                                                                                                                                                                                                                                                                      |
| <b>Introduction</b>          |         |                                                                                                                                                                                                                                                                                                                                                                                                                                                                                                                                             |
| Background/rationale         | 2       | Scientific background and rationale for the investigation being reported – PAGE 7-9                                                                                                                                                                                                                                                                                                                                                                                                                                                         |
| Objectives                   | 3       | State specific objectives, including any prespecified hypotheses- PAGE 9                                                                                                                                                                                                                                                                                                                                                                                                                                                                    |
| <b>Methods</b>               |         |                                                                                                                                                                                                                                                                                                                                                                                                                                                                                                                                             |
| Study design                 | 4       | Present key elements of study design early in the paper- PAGE 9                                                                                                                                                                                                                                                                                                                                                                                                                                                                             |
| Setting                      | 5       | Describe the setting, locations, and relevant dates, including periods of recruitment, exposure, follow-up, and data collection- PAGE 9, 11                                                                                                                                                                                                                                                                                                                                                                                                 |
| Participants                 | 6       | (a) Give the eligibility criteria, and the sources and methods of selection of participants. Describe methods of follow-up- PAGE 10<br>(b) For matched studies, give matching criteria and number of exposed and unexposed                                                                                                                                                                                                                                                                                                                  |
| Variables                    | 7       | Clearly define all outcomes, exposures, predictors, - PAGE 10-12                                                                                                                                                                                                                                                                                                                                                                                                                                                                            |
| Data sources/<br>measurement | 8*      | For each variable of interest, give sources of data and details of methods of assessment (measurement). Describe comparability of assessment methods if there is more than one group – PAGE 10-12                                                                                                                                                                                                                                                                                                                                           |
| Bias                         | 9       | Describe any efforts to address potential sources of bias – NA (CROSS-SECTIONAL BASELINE DATA ONLY ARE INCLUDED IN THIS ANALYSIS)                                                                                                                                                                                                                                                                                                                                                                                                           |
| Study size                   | 10      | Explain how the study size was arrived at – PAGE 10                                                                                                                                                                                                                                                                                                                                                                                                                                                                                         |
| Quantitative variables       | 11      | Explain how quantitative variables were handled in the analyses. If applicable, describe which groupings were chosen and why- PAGE 12                                                                                                                                                                                                                                                                                                                                                                                                       |
| Statistical methods          | 12      | (a) Describe all statistical methods, including those used to control for confounding- PAGE 12<br>(b) Describe any methods used to examine subgroups and interactions- PAGE 12<br>(c) Explain how missing data were addressed- NA (BASELINE DATA ONLY ARE INCLUDED IN THIS ANALYSIS)<br>(d) If applicable, explain how loss to follow-up was addressed NA (CROSS-SECTIONAL BASELINE DATA ONLY ARE INCLUDED IN THIS ANALYSIS)<br>(e) Describe any sensitivity analyses NA (CROSS-SECTIONAL BASELINE DATA ONLY ARE INCLUDED IN THIS ANALYSIS) |
| <b>Results</b>               |         |                                                                                                                                                                                                                                                                                                                                                                                                                                                                                                                                             |
| Participants                 | 13*     | (a) Report numbers of individuals at each stage of study—eg numbers potentially eligible, examined for eligibility, confirmed eligible, included in the study, completing follow-up, and analysed- PAGE 12, 13<br>(b) Give reasons for non-participation at each stage NA (CROSS-SECTIONAL BASELINE DATA ONLY ARE INCLUDED IN THIS ANALYSIS)<br>(c) Consider use of a flow diagram NA                                                                                                                                                       |
| Descriptive data             | 14*     | (a) Give characteristics of study participants (eg demographic, clinical, social) and information on exposures and potential confounders- PAGE 12, 13, and TABLE 1                                                                                                                                                                                                                                                                                                                                                                          |

|                          |     |                                                                                                                                                                                                                                                                                                                                                                                                                                     |
|--------------------------|-----|-------------------------------------------------------------------------------------------------------------------------------------------------------------------------------------------------------------------------------------------------------------------------------------------------------------------------------------------------------------------------------------------------------------------------------------|
|                          |     | (b) Indicate number of participants with missing data for each variable of interest<br>NA                                                                                                                                                                                                                                                                                                                                           |
|                          |     | (c) Summarise follow-up time (eg, average and total amount) NA (CROSS-SECTIONAL BASELINE DATA ONLY ARE INCLUDED IN THIS ANALYSIS)                                                                                                                                                                                                                                                                                                   |
| Outcome data             | 15* | Report numbers of outcome events or summary measures over time – TABLE 1 AND 2                                                                                                                                                                                                                                                                                                                                                      |
| Main results             | 16  | (a) Give unadjusted estimates and, if applicable, confounder-adjusted estimates and their precision (eg, 95% confidence interval). Make clear which confounders were adjusted for and why they were included. TABLES 1 AND 2<br>(b) Report category boundaries when continuous variables were categorized NA<br>(c) If relevant, consider translating estimates of relative risk into absolute risk for a meaningful time period NA |
| Other analyses           | 17  | Report other analyses done—eg analyses of subgroups and interactions, and sensitivity analyses –PAGE 13                                                                                                                                                                                                                                                                                                                             |
| <b>Discussion</b>        |     |                                                                                                                                                                                                                                                                                                                                                                                                                                     |
| Key results              | 18  | Summarise key results with reference to study objectives – PAGE 14, 15                                                                                                                                                                                                                                                                                                                                                              |
| Limitations              | 19  | Discuss limitations of the study, taking into account sources of potential bias or imprecision. Discuss both direction and magnitude of any potential bias – PAGE 18                                                                                                                                                                                                                                                                |
| Interpretation           | 20  | Give a cautious overall interpretation of results considering objectives, limitations, multiplicity of analyses, results from similar studies, and other relevant evidence<br>PAGE 14-15                                                                                                                                                                                                                                            |
| Generalisability         | 21  | Discuss the generalisability (external validity) of the study results PAGE 18                                                                                                                                                                                                                                                                                                                                                       |
| <b>Other information</b> |     |                                                                                                                                                                                                                                                                                                                                                                                                                                     |
| Funding                  | 22  | Give the source of funding and the role of the funders for the present study and, if applicable, for the original study on which the present article is based PAGE 5                                                                                                                                                                                                                                                                |

\*Give information separately for exposed and unexposed groups.

**Note:** An Explanation and Elaboration article discusses each checklist item and gives methodological background and published examples of transparent reporting. The STROBE checklist is best used in conjunction with this article (freely available on the Web sites of PLoS Medicine at <http://www.plosmedicine.org/>, Annals of Internal Medicine at <http://www.annals.org/>, and Epidemiology at <http://www.epidem.com/>). Information on the STROBE Initiative is available at <http://www.strobe-statement.org>.



**Sex work and HIV in Cambodia: trajectories of risk and disease in two cohorts of high risk young women in Phnom Penh, Cambodia**

|                                 |                                                                                                                                                                                                                                                                                                                                                                                                                                                                                                                                                                                                                                                                       |
|---------------------------------|-----------------------------------------------------------------------------------------------------------------------------------------------------------------------------------------------------------------------------------------------------------------------------------------------------------------------------------------------------------------------------------------------------------------------------------------------------------------------------------------------------------------------------------------------------------------------------------------------------------------------------------------------------------------------|
| Journal:                        | <i>BMJ Open</i>                                                                                                                                                                                                                                                                                                                                                                                                                                                                                                                                                                                                                                                       |
| Manuscript ID:                  | bmjopen-2013-003095.R1                                                                                                                                                                                                                                                                                                                                                                                                                                                                                                                                                                                                                                                |
| Article Type:                   | Research                                                                                                                                                                                                                                                                                                                                                                                                                                                                                                                                                                                                                                                              |
| Date Submitted by the Author:   | 19-Jun-2013                                                                                                                                                                                                                                                                                                                                                                                                                                                                                                                                                                                                                                                           |
| Complete List of Authors:       | Page, Kimberly; University of California San Francisco, Epidemiology and Biostatistics<br>Stein, Ellen; UCSF, Epidemiology & Biostatistics<br>Sansothy, Neth; NCHADS,<br>Evans, Jennifer; UCSF, Epidemiology & Biostatistics<br>Couture, Marie-Claude; UCSF, Epidemiology & Biostatistics<br>Sichan, Keo; Cambodia Women's Development Assoc.,<br>Cockroft, Melissa; Cambodia Women's Development Assoc.,<br>Mooney-Somers, Julie; University of Sydney, Center for Values, Ethics and the Law in Medicine<br>Phlong, Pisith; Royal University of Fine Arts,<br>Kaldor, John; University of New South Wales, The Kirby Institute<br>Maher, Lisa; The Kirby Institute, |
| <b>Primary Subject Heading</b>: | HIV/AIDS                                                                                                                                                                                                                                                                                                                                                                                                                                                                                                                                                                                                                                                              |
| Secondary Subject Heading:      | Epidemiology, Global health, HIV/AIDS, Public health                                                                                                                                                                                                                                                                                                                                                                                                                                                                                                                                                                                                                  |
| Keywords:                       | EPIDEMIOLOGY, HIV & AIDS < INFECTIOUS DISEASES, Public health < INFECTIOUS DISEASES                                                                                                                                                                                                                                                                                                                                                                                                                                                                                                                                                                                   |
|                                 |                                                                                                                                                                                                                                                                                                                                                                                                                                                                                                                                                                                                                                                                       |

SCHOLARONE™  
Manuscripts

1 Sex work and HIV in Cambodia: trajectories of risk and disease in two cohorts of high  
2 risk young women in Phnom Penh, Cambodia  
3  
4  
5  
6  
7  
8  
9

10 Kimberly Page, Ph.D.<sup>1</sup>, Ellen Stein, MPH<sup>1</sup>, Neth Sansothy, M.D.<sup>2</sup>, Jennifer Evans, M.S.<sup>1</sup>,  
11 Marie-Claude Couture, Ph.D.<sup>1</sup>, Keo Sichan<sup>3</sup>, Melissa Cockroft, BA<sup>3\*</sup>, Julie Mooney-  
12 Somers, Ph.D.<sup>4, 5</sup>, Pisith Phlong, M.A.<sup>6</sup>, John Kaldor, Ph.D.<sup>4</sup>, Lisa Maher Ph.D.<sup>4</sup>, (on  
13 behalf of the Young Women's Health Study Collaborative: John Kaldor, Ph.D.<sup>4</sup>, Serey  
14 Phal Kien<sup>3</sup>, Kimberly Page, Ph.D.<sup>1</sup>, Joel M. Palefsky M.D.<sup>7</sup>, Vonthanak Saphonn, M.D.<sup>2</sup>,  
15 Mean Chhi Vun, M.D.<sup>2</sup>).  
16  
17  
18  
19  
20  
21  
22  
23  
24  
25  
26  
27  
28

- 29 1. University of California San Francisco, Department of Epidemiology and Biostatistics;  
30 San Francisco, and Global Health Sciences, 50 Beale St., 12<sup>th</sup> Floor, San Francisco, CA,  
31 94105; USA  
32  
33
- 34 2. National Center for HIV/AIDS, Dermatology and STDs (NCHADS), #245H, Street 6A,  
35 Phum Kean Khlang, Sangkat Prekleap Russey Keo, Phnom Penh, Cambodia  
36  
37
- 38 3. Cambodian Women's Development Association (CWDA); No. 19, Street 242, Boeung  
39 Prolit, Khan 7 Makara, Phnom Penh, Cambodia  
40  
41
- 42 4. The Kirby Institute (formerly the National Centre in HIV Epidemiology and Clinical  
43 Research); University of New South Wales, CFI building, corner of West and Boundary  
44 Streets, Darlinghurst, NSW 2010, Australia  
45  
46
- 47 5. The Centre for Values, Ethics and the Law in Medicine, The University of Sydney  
48 Level 1 of the Medical Foundation Building, 92-94 Parramatta Road, Camperdown, NSW,  
49 Australia  
50  
51
- 52 6. Royal University of Fine Arts, 72 Street 19, Phnom Penh, Cambodia.  
53  
54  
55  
56  
57  
58  
59  
60

1  
2  
3  
4  
5  
6  
7  
8  
9  
10  
11  
12  
13  
14  
15  
16  
17  
18  
19  
20  
21  
22  
23  
24  
25  
26  
27  
28  
29  
30  
31  
32  
33  
34  
35  
36  
37  
38  
39  
40  
41  
42  
43  
44  
45  
46  
47  
48  
49  
50  
51  
52  
53  
54  
55  
56  
57  
58  
59  
60

7. University of California San Francisco, Department of Medicine; 513 Parnassus Ave,  
Med Sci S-420; UCSF, San Francisco, San Francisco, CA. 94143 - 0654

\*Melissa Cockroft is currently at Marie Stopes International in Phnom Pehn, Cambodia

Address correspondence to:

Kimberly Page, Ph.D., MPH, Dept. of Epidemiology and Biostatistics, Global Health  
Sciences, University of California San Francisco, CA 94105; 50 Beale St., 12<sup>th</sup> Floor, San  
Francisco, CA USA, 94105. [kpage@psg.ucsf.edu](mailto:kpage@psg.ucsf.edu)

Word count: Abstract: 296; Text 3444; 3 Tables, 2 Figures.

Key words: Cambodia, female sex workers, HIV, STI, risk, amphetamine-type  
stimulant, alcohol, policy effects

Short title: HIV infection and risk in two samples of FSW in Phnom Penh, Cambodia

## Abstract

**Objectives:** HIV prevalence among Cambodian female sex workers (FSW) is among the highest in Southeast Asia. We describe HIV prevalence and associated risk exposures in FSW sampled serially in Phnom Penh, Cambodia (Young Women's Health Study (YWHS), before and after the implementation of a new law designed to combat human trafficking and sexual exploitation.

**Design:** Cross-sectional analysis of baseline data from two prospective cohorts.

**Setting:** Community-based study in Phnom Penh, Cambodia.

**Participants:** Women aged 15-29 years, reporting  $\geq 2$  sexual partners in the last month and/or engaged in transactional sex in the last 3 months, were enrolled in the studies in 2007 (N=161; YWHS-1), and 2009 (N=220; YWHS-2) following information sessions where 285 and 345 women attended.

**Primary outcomes:** HIV prevalence, sexual risk behaviour, amphetamine-type stimulant (ATS) and alcohol use, and work-related factors were compared the two groups, enrolled before and after implementation of the new law.

**Results:** Participants and in the two cohorts were similar in age (median 25 years), but YWHS-2 women reported fewer sex partners, more alcohol use, and less ATS use. A higher proportion of YWHS-2 compared to YWHS-1 women worked in entertainment-based venues (68% vs. 31%, respectively). HIV prevalence was significantly lower in the more recently sampled women: 9.2% (95% CI 4.5, 13.8) vs. 23% (95% CI 16.5, 29.7).

**Conclusions:** Sex work context and risk has shifted among young FSW in Phnom Penh, following implementation of anti-prostitution and anti-trafficking laws. While both cohorts were recruited using the same eligibility criteria, more recently sampled women had lower prevalence of sexual risk and HIV infection. Women engaged more directly in transactional sex have become harder to sample and access. Future prevention



1 research and programs need to consider how new policies and demographic changes in  
2  
3  
4 FSW impact HIV transmission.  
5  
6  
7  
8  
9  
10  
11  
12  
13  
14  
15  
16  
17  
18  
19  
20  
21  
22  
23  
24  
25  
26  
27  
28  
29  
30  
31  
32  
33  
34  
35  
36  
37  
38  
39  
40  
41  
42  
43  
44  
45  
46  
47  
48  
49  
50  
51  
52  
53  
54  
55  
56  
57  
58  
59  
60

For peer review only

## Article summary

### Article Focus

- HIV prevalence and incidence in two serial samples of young female sex workers in Phnom Penh, Cambodia (2007-2008, and 2009-2010);
- Comparison of baseline risk and HIV outcomes, including sexual behavior, drug and alcohol use in the two cohorts sampled before and after implementation of anti-trafficking and sexual exploitation laws in 2008;
- Impact of anti-trafficking and sexual exploitation legislation on female sex workers and HIV risk.

### Key Messages

- Women sampled using the same eligibility criteria and outreach methods in differed with respect to risk exposures and HIV outcomes;
- Changes in sex work typology and environment are evident after enactment of the anti-trafficking laws, including very few brothel-based FSW and significantly more FSW based in the entertainment sector;
- Shifts in the context of sex work and risk highlight the ongoing need and challenges for HIV and drug prevention for young women engaged in sex work.

### Strengths and Limitations

- Two comparably sampled groups of young FSW suggest changing trends in HIV risk;
- Comparison of cross-sectional samples is ecological and does not prove temporal effects;
- Criminalization and suppression of sex work and a flourishing entertainment-based sex work industry set new and conflicting stage for HIV prevention.

1 Author Contributions: All authors contributed to the design and implementation of the  
2  
3 YWHS-1 and -2 studies. Authors KP, ES, JE, and LM compiled the first draft of the  
4  
5 manuscript, which was reviewed by NS, M-CC, KS, MC, JM\_S, PP, JK. The primary  
6  
7 statistical analysis was conducted by JE and M-CC; KS and MC provided supplemental  
8  
9 data review, and KP reviewed all data analyses. All authors contributed to and have  
10  
11 approved the final manuscript. The YWHS Collaborative is a steering committee who  
12  
13 reviewed and approved the study protocols, and provided expertise into some or all of  
14  
15 the studies' methods and implementation.  
16  
17  
18  
19  
20  
21

22 Data Sharing: no additional data available.  
23  
24  
25

26 Funding sources and conflicts of interest: The Young Women's Health Study-1 and  
27  
28 YWHS-2 were supported by Awards 1R21DA025441 from the National Institute on Drug  
29  
30 Abuse, and R01NR010995 from the National Institute of Nursing Research. M-C Couture  
31  
32 was also supported by the Canadian Institutes of Health Research (postdoctoral  
33  
34 fellowship award). Professors Lisa Maher and John Kaldor are supported by Australian  
35  
36 National Health and Medical Research Council (NHMRC) Research Fellowship. The Kirby  
37  
38 Institute is affiliated with the Faculty of Medicine, University of New South Wales and is  
39  
40 funded by the Australian Government Department of Health and Ageing. The content is  
41  
42 solely the responsibility of the authors and does not necessarily represent the official  
43  
44 views of the National Institutes of Health, nor the Australian Government. The authors  
45  
46 have no conflicts to disclose.  
47  
48  
49  
50  
51  
52

53 Acknowledgments: The authors would like to acknowledge the coordinated efforts and  
54  
55 dedication of the research teams at the National Center for HIV/AIDS, Dermatology,  
56  
57 and STDs and the Cambodian Women's Development Agency. We are indebted to all the  
58  
59  
60

1  
2  
3  
4  
5  
6  
7  
8  
9  
10  
11  
12  
13  
14  
15  
16  
17  
18  
19  
20  
21  
22  
23  
24  
25  
26  
27  
28  
29  
30  
31  
32  
33  
34  
35  
36  
37  
38  
39  
40  
41  
42  
43  
44  
45  
46  
47  
48  
49  
50  
51  
52  
53  
54  
55  
56  
57  
58  
59  
60

Cambodian women who agreed to participate in this study and grateful for the privilege to work with them.

For peer review only

## Introduction

There have been significant declines in HIV prevalence in Cambodia since the epidemic peaked in around 2000, a success widely attributed to measurable increases in condom use, declines in the number and frequency of commercial sex transactions reported by men, access to HIV voluntary counseling & testing (VCT) and uptake of antiretroviral therapy.<sup>1-3</sup> In 2010, the National Center for HIV/AIDS, Dermatology and STDs (NCHADS) revised the national estimate of HIV prevalence to 0.8% (in 15-49 year olds), reflecting a significant decline after the peak estimate of 2.4% in 1998.<sup>4</sup> However, HIV prevalence in Cambodian women, especially young women, is among the highest in Southeast Asia and heterosexual sex remains the main route of transmission.<sup>5-9</sup> Since 2006, women have accounted for over half (52%) of all HIV infections in Cambodia<sup>10</sup>, higher than in Asia and the Pacific in general (35%).<sup>11</sup> Limited income generating activities, a highly mobile workforce, trafficking in women and girls and widespread transactional sex, poverty, and sexually transmitted infections (STI) have been identified as key drivers of the epidemic among female sex workers (FSW).<sup>1 5 6 10 12-15</sup> As in many countries, FSW in Cambodia can be hard to reach and difficult to provide prevention services to. In recent years significant economic and policy changes have affected the sex work landscape, with notable shifts in sex work venues, typologies, and more women engaged in transactional sex than ever before.<sup>16-20</sup>

Until 2008, FSW in Cambodia were categorized as "direct" and were mostly brothel-based, or "indirect". Indirect FSW were distinguished from direct FSW, generally working in entertainment establishments as beer promotion girls, waitresses, hostesses, or karaoke girls for example, and engaged in occasional transactional sex for supplementary income.<sup>21-23</sup> In 1997, an estimated 5,300 women worked in the entertainment/service sector and 6,000 were brothel-based FSW. The number of

1 women involved in entertainment-based sex work has grown dramatically in recent  
2 years in Cambodia. Until 2008, the estimated number of women engaged in sex and  
3 entertainment work was stable (12,762 women were enumerated in 2008), however by  
4 2012, this had increased dramatically to an estimated 41,622 women, a more than  
5 threefold increase from the 2008 estimate (NCHADS, personal communication). The  
6 reasons for this growth have not been explored in detail, but may be associated with  
7 changing economic factors during this time in Cambodia. Following the passage and  
8 implementation of the "Law on Suppression of Human Trafficking and Sexual  
9 Exploitation" in February, 2008, brothel-based sex work was banned, and the most  
10 direct effect was on direct sex trade, which went "underground", or women moved into  
11 indirect work.<sup>10</sup> Along with the overt enforcement against FSW, the 2008 anti-  
12 trafficking legislation had other consequences. For instance, official terminology used by  
13 governmental and non-governmental organizations (NGO) to describe FSW labeled all  
14 women engaged in sex and entertainment work as "entertainment workers", or EW\*.  
15 Historically, brothel-based FSW were easily accessed and monitored for HIV prevention  
16 efforts, including HIV and behavioral surveillance. NGOs working in HIV prevention  
17 reported that as transactional sex was displaced to a wider range of settings, women at  
18 highest risk became harder to reach for both prevention and service delivery.<sup>16 24 25</sup>  
19 These factors pose significant challenges to HIV prevention and threaten to undermine  
20 progress achieved to date.

---

21  
22  
23  
24  
25  
26  
27  
28  
29  
30  
31  
32  
33  
34  
35  
36  
37  
38  
39  
40  
41  
42  
43  
44  
45  
46  
47  
48  
49  
50  
51  
52  
53  
54  
55  
56  
57  
58  
59  
60

\* The term 'female sex worker' is no longer used in Cambodia. Terminology was changed in 2008 to designate high risk women working in service and entertainment venues as "entertainment workers" or EW. No new HIV surveillance data has been published on FSW, and Behavioral Surveillance Survey (BSS) methods have been changed to recognize only indirect sex workers- 'EW', and determining whether or not they are selling sex by the average number of reported sex partners per week (10. UNAIDS. Cambodia Country Progress Report: Monitoring the Progress towards the Implementation of the Declaration of Commitment on HIV and AIDS. Reporting period: January 2010-December 2011. Prepared by National AIDS Authority for United Nations General Assembly Special Session (UNGASS). <http://www.unaids.org/en/regionscountries/countries/cambodia/> Accessed December 28, 2012..

1 HIV prevalence is extremely high among Cambodian FSW with prevalence among  
2 younger women is particularly troubling as their infection is likely to be more recent and  
3 indicative of incidence.<sup>5 8 9 21</sup> A cornerstone of HIV prevention in Cambodia was the  
4 100% Condom Use campaign<sup>26 27</sup>, primarily directed at brothel-based FSW. With  
5 changes in sex work venues, this prevention approach is likely less effective, failing to  
6 reach the large number of women now engaged in transactional sex in entertainment  
7 establishments. Indeed, measures of self-reported condom use have declined according  
8 to monitoring data reported by UNAIDS.<sup>10</sup> New risk factors have also emerged,  
9 especially amphetamine-type stimulant (ATS) use, in the form of “yama”, (pills) and  
10 “ice” (a crystalline form).<sup>28-38</sup> ATS use is associated with increased sexual risk behavior  
11 and STI incidence among these young women<sup>5 39</sup>, similar to that seen in other  
12 populations and locales.<sup>40-44</sup>

13 We conducted two prospective studies of high-risk young women engaged in  
14 transactional sex in Phnom Penh, the principal research questions focused on estimating  
15 HIV and STI prevalence and incidence and associated risk factors. The first, Young  
16 Women’s Health Study (YWHS-1), was conducted in 2007-2008 and the second, YWHS-  
17 2, in 2009-2010.<sup>5 16 39 45 46</sup> In this paper, we explore the changing HIV risk landscape by  
18 comparing and contrasting the two cohorts of FSW sampled prior to, and following,  
19 legislative changes designed to combat human trafficking and sexual exploitation in  
20 Cambodia. We theorize that the demographic characteristics and HIV risk of FSW has  
21 shifted as a result of socio-legal changes induced by the implementation of the new  
22 legislation.

## 23 **Methods**

### 24 ***Study setting***

1 The YWHS-1 and YWHS-2 were both prospective studies of young women engaged in  
2 sex work in Phnom Penh, Cambodia. Methods have been described in detail previously.<sup>5</sup>  
3  
4  
5  
6 <sup>39</sup> Both studies were led by a multidisciplinary collaborative prevention research group  
7  
8 from NCHADS, the Cambodian Women's Development Association (CWDA), the  
9  
10 University of California in San Francisco (UCSF) in the United States, and the Kirby  
11  
12 Institute at the University of New South Wales (UNSW) in Australia.  
13  
14

### 15 16 17 **Study population and recruitment**

18  
19 The target population in both studies was young women engaged in transactional sex in  
20 Phnom Penh. Inclusion criteria were: aged 15-29 years, Khmer language  
21  
22 comprehension,  $\geq 2$  different sexual partners in the last month *or* engaged in  
23  
24 transactional sex (sex in exchange for money, goods, services, or drugs) within the last  
25  
26 three months, no plans to move in the next 12 months, biologically female, and able to  
27  
28 provide voluntary informed consent. YWHS-1 aimed to sample 160 women to provide  
29  
30 80% power to estimate a point prevalence of HIV at 15% with a 95% confidence  
31  
32 interval (CI) of 9.7% to 23.0%. Based on results of YWHS-1, YWHS-2 aimed to sample  
33  
34 220 women to detect an estimated HIV prevalence of 23% (95% CI, 17.3%, 30.5%).  
35  
36  
37  
38  
39  
40  
41  
42

43 Recruitment and enrollment procedures were the same in both studies.<sup>5</sup> CWDA field  
44  
45 assistants provided study information and conducted eligibility screening via information  
46  
47 meetings in neighborhoods where sex work was prevalent. Eligible women were invited  
48  
49 to a community location used by various sex-worker organizations where study  
50  
51 information was described in more detail and written informed consent was obtained.  
52  
53 Enrolled participants were given appointment cards to present to the YWHS clinic field-  
54  
55 site and free transportation was offered. In both studies, women were remunerated  
56  
57 US\$5 at each study visit for their participation time.  
58  
59  
60



### **Data collection**

All data collection occurred at the YWHS clinic, which was staffed by a physician, nurses, counselors and a laboratory technician. A structured questionnaire was administered in Khmer by trained interviewers. Survey items were similar in both studies, and covered socio-demographic characteristics, occupational and sexual risk history, alcohol and drug use. HIV testing was conducted at each visit. In YWHS-1, urine specimens were tested for *Chlamydia trachomatis* (CT) and *Neisseria gonorrhoea* (GC). In YWHS-2, women were tested for HPV infection. STI treatment was provided at no cost, and women with HIV and HPV infection were referred to a local provider for free medical evaluation and treatment.

### **Laboratory testing**

HIV serology was performed using two rapid tests; Uni-Gold Recombigen<sup>™</sup> HIV rapid HIV test (Trinity Biotech USA, Jamestown, NY) and the Clairview HIV 1/2 STAT-PAK (Inverness Medical Diagnostics, Waltham, MA). HIV positive and discordant samples were confirmed by HIV-1 immunoblot. CT and GC were assessed from urine samples using BDProbeTec<sup>™</sup> strand displacement amplification assay (Becton Dickinson, Sparks, MD) at the NCHADS STD laboratory.<sup>5</sup> Cervical specimens for HPV testing were collected using a standard cytobrush.<sup>47</sup> Client-centered risk reduction counseling was provided in association with all testing.

### **Ethical review**

The study protocols were reviewed and approved by Institutional Review Board of the Committee on Human Research at UCSF, the Cambodian National Ethics Committee, and the University of New South Wales Human Research Ethics Committee in

1 accordance with ethical standards (institutional and national) and with the Helsinki  
2 Declaration of 1975, as revised in 2000.  
3  
4  
5  
6  
7

### 8 **Measures**

9  
10 Both studies aimed to estimate HIV infection, ATS use, and sexual risk behavior and  
11 included questions on sociodemographic factors, work history, income, and duration of  
12 sex work, and whether they currently had an employer (manager, boss or supervisor).  
13 Women were asked if they had ever and/or were currently working: as a beer promoter,  
14 in a beer garden, as a waitress or hostess in a karaoke bar, nightclub or snooker bar, in  
15 a massage parlor, brothel, as a freelance sex worker using space at a brothel, as a  
16 freelance sex worker in the park or on the street, or to specify 'other' location. They  
17 were asked about age at first sex, number of partners (last month) and condom use  
18 with last partners (paying and non-paying). Paying partners were defined as male  
19 clients with whom respondents traded sex for money, goods or drugs. Condom use was  
20 classified as "consistent" if the participant reported always using a condom. Participants  
21 were asked about the number of days in which alcohol was drunk and the number of  
22 days in which they were "affected" by alcohol or were "drunk" in the past month. ATS  
23 use (ever and last 3 months) was assessed with questions regarding use of *yama* and  
24 crystal (ice).  
25  
26  
27  
28  
29  
30  
31  
32  
33  
34  
35  
36  
37  
38  
39  
40  
41  
42  
43  
44  
45  
46

### 47 **Analyses**

48  
49 Prevalence estimates were calculated using exact binomial confidence intervals (CI).  
50 Chi-square and Fisher's Exact Tests were used to examine differences in baseline socio-  
51 demographic, occupational, sexual, and alcohol/drug use exposures and prevalent HIV  
52 and STI between the two cohorts. The only longitudinal data compared was HIV  
53 incidence. The HIV incidence rate calculated using the number of seroconversions per  
54  
55  
56  
57  
58  
59  
60

1 100 person-years of observation (PYO) assuming a Poisson distribution. Analyses were  
2 performed using STATA 9.0 (STATA, College Station, TX).  
3  
4  
5  
6  
7

## 8 **Results**

9  
10 In YWHS-1, 285 women attended community information sessions, 161 (56%) eligible  
11 women were recruited to the group information/consent meeting, and 160 (99%)  
12 consented to participate. In YWHS-2, 220 (64%) women consented out of 345 who  
13 attended information sessions. Sixty-seven women from YWHS-1 also enrolled in  
14 YWHS-2; they were not included in the YWHS-2 comparison group, leaving 153 in the  
15 analysis. Table 1 shows baseline socio-demographic and occupational factors, as well as  
16 sexual and substance use risk exposures, in the two cohorts. The cohorts were similar  
17 with respect to age (median 25 years), and age of sexual debut (median 17 and 18  
18 years, respectively), but differed significantly in years of education and marital status.  
19 Compared to women in YWHS-1, women in YWHS-2 had more education (median of 5  
20 years (IQR 2,7) vs. 2 years (IQR 0,4)), and were more likely to be married or  
21 cohabitating with a partner (31.4% vs. 15%, respectively).  
22  
23  
24  
25  
26  
27  
28  
29  
30  
31  
32  
33  
34  
35  
36  
37

38 Women in YWHS-2 had been involved in sex work for significantly less time (median of  
39 3 years (IQR 1.7, 5)) than YWHS-1 women (median of 4.3 years (IQR 2.5, 6.3)). More  
40 YWHS-2 women were currently (last 30 days) working in entertainment venues and  
41 fewer in brothels, or as freelance FSW (including in parks, guest houses, or on the  
42 street). These differences were also reflected in the significantly higher proportion of  
43 YWHS-2 women who reported having a manager or boss (81.6%) compared to YWHS-1  
44 (46%). Figure 1 shows the distribution and range of work venues women reported 'ever'  
45 working in. Women in YWHS-2 also reported significantly fewer sexual partners in the  
46 past 30 days: a median of 5 compared to 30 in YWHS-1 (Table 1). Despite these  
47 differences, women in the two samples reported similar income distributions. Self-  
48  
49  
50  
51  
52  
53  
54  
55  
56  
57  
58  
59  
60

1 reported consistent condom use, with both paying and non-paying partners, did not  
2  
3 differ between cohorts. Alcohol and ATS use differed significantly: women in YWHS-2  
4  
5 reported more alcohol use, but fewer days drunk in the past month than in YWHS-1;  
6  
7 and fewer women in YWHS-2 reported ever using ATS, although recent use was similar  
8  
9 in both groups (Table 1). Both alcohol and ATS use varied by cohort and work venue:  
10  
11 entertainment-based women in YWHS-2 reported less of both, whereas brothel and  
12  
13 freelance-based women in YWHS-2 reported significantly more ATS use (Figure 2).  
14  
15  
16  
17  
18  
19

20  
21 HIV prevalence was significantly ( $p < 0.01$ ) lower in women sampled in YWHS-2  
22  
23 compared to YWHS-1: 9.2% (95% CI 4.5%, 13.8%;  $p < 0.01$ ) vs. 23% (95% CI 16.5%,  
24  
25 29.7%) (Table 2). When the 67 women who had participated in both samples were  
26  
27 included in YWHS-2, HIV prevalence was 15.5% (95% CI 10.6, 20.3). HIV incidence  
28  
29 was also lower in YWHS-2: 0.8/100 pyo (95% CI 0.1, 6.0) vs. 3.6/100 pyo (95% CI  
30  
31 1.2, 11.1), but not significantly ( $p = 0.26$ ). In YWHS-1, prevalence of Chlamydia infection  
32  
33 was 11.5% (95% CI 6.0%, 17.1%) and Gonorrhoea infection was 7.8% (95% CI 3.5%,  
34  
35 12.3%). Women in YWHS-2 were not tested for these STI, but 41.1% were HPV. HIV  
36  
37 prevalence differed significantly by work venue and by cohort, but over 30% of  
38  
39 freelance-based women tested positive in both cohorts (Table 2).  
40  
41  
42  
43

44 In both cohorts, 20% reported being tested for HIV in the past 3 months but more  
45  
46 YWHS-2 women had a history of testing (Table 3). More women in YWHS-1 reported not  
47  
48 knowing their HIV test results: 11 of the 84 women (13.1%) who reported being  
49  
50 negative tested positive and 4 of 12 women (33.3%) who reported they did not know  
51  
52 their previous HIV results tested positive. In YWHS-2, 5 of 114 (4.4%) who reported  
53  
54 testing negative, and 2 of 4 (50%) who did not know their previous results, tested  
55  
56  
57  
58  
59  
60

1 positive. Among women who reported no history of HIV testing, 31% (18/58) and  
2  
3  
4 12.9% (4/31) tested HIV positive in YWHS-1 and -2, respectively.  
5  
6  
7

## 8 9 **Discussion**

10  
11  
12 In these two samples of young FSW, recruited using the same eligibility criteria and  
13  
14 outreach methods, we observed important differences in socio-demographics, risk  
15  
16 exposures and HIV infection outcomes. Most notably, women sampled more recently  
17  
18 were more educated, had fewer sex partners, less time working in sex work and had  
19  
20 significantly lower prevalence of HIV. Where women worked was also very different in  
21  
22 the two cohorts: a much higher proportion of women sampled in 2009-10 compared to  
23  
24 2007-8 worked in entertainment-based establishments and fewer were brothel-based or  
25  
26 freelance FSW. These differences point to the notable changes in sex work typology and  
27  
28 environment that occurred following the enactment and enforcement in 2008 of anti-  
29  
30 trafficking legislation in Cambodia<sup>16</sup>. Brothel closures and increases in policing have  
31  
32 been acknowledged as a cause of significant social and occupational upheaval among  
33  
34 FSW, driving many women, especially former brothel-based FSW, "underground".<sup>10</sup> Both  
35  
36 government agencies and NGOs in Phnom Penh have reported negative impacts of the  
37  
38 legislation on FSW including: displacement and harassment and reduced access to  
39  
40 condoms and health care.<sup>10 20 24</sup> In our qualitative research, women confirmed these  
41  
42 impacts, describing how they moved to new venues or locales for sex work transactions  
43  
44 including apartments or houses rented by brothel owners following brothel closures<sup>16</sup>,  
45  
46 raising concerns about increased risks of HIV transmission as a result of the increasingly  
47  
48 clandestine nature of direct sex work. The significant increases in the number of women  
49  
50 involved in sex work also warrant attention.  
51  
52  
53  
54  
55  
56  
57  
58  
59  
60

1 The differences in HIV prevalence, risk profiles, and sex work environments reported by  
2 these two samples are consistent with both quantitative and qualitative research  
3 demonstrating how socio-political and environmental factors can increase vulnerability  
4 to HIV among FSW.<sup>48-51</sup> The time period in which these two cohorts were sampled,  
5 corresponded with increased criminalization of sex work which impacted the number  
6 and settings of transactional sex. These shifts can have mixed effects. First, women  
7 engaged in entertainment-based work have lower risk profiles than women engaged in  
8 freelance sex work.<sup>5</sup> The shorter duration of sex work reported by entertainment-based  
9 FSW likely contributes to the lower HIV prevalence in this group. Protective effects of  
10 entertainment-based work may include having a boss or manager; odds of HIV among  
11 women who say they have a boss or manager are lower compared to women who do  
12 not (OR: 0.40; 95% CI 0.19, 0.90).<sup>5</sup> We also explored these factors in qualitative  
13 interviews with FSW.<sup>16</sup> Brothel and entertainment-based sex workers reported that the  
14 'boss/manager' mitigated risk of violence from clients and problems with police. Also,  
15 women working in entertainment establishments report earning up to three times more  
16 (US \$50-\$60 or in \$200,000-\$240,000 Cambodian Riel) per client than women who  
17 worked in brothels or streets and parks.<sup>16</sup> This is substantiated by the two cohorts'  
18 report of similar income levels despite differences in the number of sex partners. It is  
19 also possible that entertainment-based FW have lower risk partners than brothel-based  
20 and freelance FSW. Despite the lower prevalence of HIV and the lower number of male  
21 sex partners reported by this growing group of FSW, there is significant potential for  
22 amplified transmission of HIV at a population level, given the extraordinary growth in  
23 the size of the population, especially if male partners bridge to women who are not  
24 involved in transactional sex.  
25  
26  
27  
28  
29  
30  
31  
32  
33  
34  
35  
36  
37  
38  
39  
40  
41  
42  
43  
44  
45  
46  
47  
48  
49  
50  
51  
52  
53  
54  
55  
56  
57  
58  
59  
60

1 The two cohorts also showed differences in drug and alcohol use exposures. Our group  
2 has identified ATS use as a significant independent risk factor for HIV related risk  
3 behaviour including number of sex partners (Adjusted Risk Ratio (ARR): 1.49; 95% CI  
4 1.0, 2.21) and incident STI (AOR: 5.41; 95% CI 1.15, 25.48)<sup>39</sup>. Alcohol use is also  
5 emerging as a potential HIV-related risk factor<sup>16</sup>, although not well quantified among  
6 FSW, especially those working in entertainment establishments (or their male partners).  
7 Entertainment venues largely revolve around alcohol, and women working at these are  
8 generally employed as hostesses, waitresses, or as “promoters” such as “beer  
9 promotion girls” in a variety of venues.<sup>16 21</sup> Women who were working in the  
10 entertainment sector were more likely to both report more days of drinking, and more  
11 days intoxicated, than brothel or street-based FSW. Alcohol use can be a barrier to  
12 effective condom use and condom negotiation in the transactional context.<sup>16 52</sup> Although  
13 women in the two samples did not report differences in inconsistent condom use, we  
14 have previously found that women who report heavy alcohol use are also significantly  
15 more likely to report inconsistent condom use.<sup>39</sup> Given how entwined drug and alcohol  
16 use are with sex work, especially in the growing entertainment-based sector, there is a  
17 significant need to better elucidate ways to mitigate HIV-associated risks among women  
18 whose livelihood depends on working in these establishments. Designing and  
19 implementing prevention in these contexts will require input, not only from working  
20 women, but also from the wider business sector, as well as male clients.<sup>48 53-56</sup>

21 The differences in HIV and risk profiles between the women in our two samples, as well  
22 as outreach efforts by HIV prevention organizations, may be a result of reaching “low  
23 hanging fruit” resulting from both substantive increases in the number of women  
24 working in entertainment establishments, and the increased challenges of engaging  
25 women with higher risk and who are HIV infected for the reasons described above. FSW  
26  
27  
28  
29  
30  
31  
32  
33  
34  
35  
36  
37  
38  
39  
40  
41  
42  
43  
44  
45  
46  
47  
48  
49  
50  
51  
52  
53  
54  
55  
56  
57  
58  
59  
60

1 in Phnom Penh have historically been easily accessed for prevention and surveillance  
2 efforts. However, recent changes in the sex work landscape suggest that alternative  
3 sampling methods, such as respondent driven sampling, may result in better access to  
4 higher risk women who are more hidden and therefore hard to reach in this new legal  
5 climate.<sup>57</sup>

6  
7  
8  
9  
10  
11  
12  
13  
14  
15 HIV prevention remains an important and essential priority for all women engaged in  
16 transactional sex. A recent systematic review confirms that FSW in Asia have the  
17 highest odds of infection compared to women of reproductive age in the general  
18 population.<sup>58</sup> In addition to new structural interventions aimed at reducing risk in the  
19 work-based environment, the very high prevalence and risk of HIV among FSW in  
20 Cambodia suggests a need for combination HIV prevention interventions including  
21 biomedical (pre-exposure prophylaxis, microbicides, and treatment as prevention),  
22 behavioural and development approaches (such as microfinance or income generating  
23 opportunities).<sup>59-64</sup>

24  
25  
26  
27  
28  
29  
30  
31  
32  
33  
34  
35  
36  
37  
38 Several limitations of these analyses should be noted. First results presented here are  
39 cross-sectional and thus associations do not reflect causality. The comparison of the  
40 serial samples is ecological in nature and does not prove temporal effects. The sample  
41 sizes are small and thus subject to limitations with respect to generalizability. Many  
42 exposures are self-reported and thus may reflect social desirability bias, especially  
43 condom use which we have found has been over-reported based on biomarker data.<sup>65</sup>  
44  
45  
46  
47  
48  
49  
50  
51  
52 On the other hand, we have found that self-reported ATS use is accurate compared to  
53 urine toxicology screening, suggesting that measures of drug and alcohol use in this  
54 group are accurate.<sup>66</sup>



1 Results from this analysis provide important insights into recent shifts in the context of  
2 sex work and risk in young FSW in Phnom Penh, highlight challenges to HIV prevention  
3 in this environment, and also point to the need for more research. Conflicting trends,  
4 including the criminalization and suppression of direct sex work while the indirect  
5 entertainment-based sex work industry is flourishing, has potentially set a new stage.  
6 Unless there is acknowledgment and access to women who are more directly engaged in  
7 sex work, these women will be poorly represented in any national HIV or behavioural  
8 surveillance. They will remain hidden and stigmatized, subject to repression, violence  
9 and potentially with less access to prevention or care. While the 100% condom use  
10 program had its criticisms, that policy at least acknowledged the existence and need for  
11 HIV prevention at a multisectoral level for FSW. The current socio-political climate has  
12 potentially reversed these benefits, by denying the existence of FSW. Further in-depth  
13 research among both FSW, their male clients and among entertainment venue  
14 management would help to elucidate the impacts, both positive and negative of these  
15 new laws. The exponential growth of entertainment-based sex work has the potential to  
16 result in an expanding HIV epidemic among young women in Cambodia. From a  
17 programmatic perspective entertainment-based FSW are much easier to reach but likely  
18 require different HIV prevention interventions than the 100% condom use program.  
19 Implementation of research and programmatic efforts that integrate health, social  
20 empowerment, and safe work environments for HIV prevention remain a high priority  
21 for women engaged in sex work in Cambodia.<sup>67</sup>

## References

1. NCHADS. Ministry of Health National Center for HIV, AIDS, Dermatology and STDs. Annual Report 2009: National Centre for HIV/AIDS, Dermatology and STDs, Cambodia; <http://www.nchads.org/report.php>; Accessed July 8, 2011, 2011.
2. Saphonn V, Sopheab H, Sun LP, Vun MC, Wantha SS, Gorbach PM, et al. Current HIV/AIDS/STI epidemic: intervention programs in Cambodia, 1993-2003. *AIDS Educ Prev* 2004;16(3 Suppl A):64-77.
3. NCHADS. Behavioral Sentinel Surveillance 2010. *Cambodia National Center for HIV, AIDS, Dermatology and STD Dissemination Conference, December 30, 2010* 2011.
4. NCHADS. Ministry of Health National Center for HIV, AIDS, Dermatology and STDs. Estimation of the HIV prevalence among the general population in Cambodia. : National Centre for HIV/AIDS, Dermatology and STDs, Cambodia; <http://www.nchads.org/index.php?id=20&event=146> Accessed July 8, 2011, 2011.
5. Couture MC, Sansothy N, Saphonn V, Phal S, Sichan K, Stein E, et al. Young women engaged in sex work in Phnom Penh, Cambodia, have high incidence of HIV and sexually transmitted infections, and amphetamine-type stimulant use: new challenges to HIV prevention and risk. *Sex Transm Dis* 2011;38(1):33-9.
6. Sopheab H, Saphonn V, Chhea C, Fylkesnes K. Distribution of HIV in Cambodia: findings from the first national population survey. *AIDS* 2009;23(11):1389-95.
7. Sopheab H, Morineau G, Neal JJ, Saphonn V, Fylkesnes K. Sustained high prevalence of sexually transmitted infections among female sex workers in Cambodia: high turnover seriously challenges the 100% Condom Use Programme. *BMC Infect Dis* 2008;8:167.
8. Sopheab H, Gorbach PM, Gloyd S, Leng HB. Rural sex work in Cambodia: work characteristics, risk behaviours, HIV, and syphilis. *Sex Transm Infect* 2003;79(4):e2.
9. Saphonn V, Parekh BS, Dobbs T, Mean C, Bun LH, Ly SP, et al. Trends of HIV-1 Seroincidence Among HIV-1 Sentinel Surveillance Groups in Cambodia, 1999-2002. *J Acquir Immune Defic Syndr* 2005;39(5):587-92.
10. UNAIDS. Cambodia Country Progress Report: Monitoring the Progress towards the Implementation of the Declaration of Commitment on HIV and AIDS. Reporting period: January 2010-December 2011. Prepared by National AIDS Authority for United Nations General Assembly Special Session (UNGASS). . <http://www.unaids.org/en/regionscountries/countries/cambodia/> Accessed December 28, 2012.
11. UNAIDS. HIV in Asia and the Pacific: Getting to Zero. [http://www.unaids.org/en/media/unaids/contentassets/documents/unaidspublication/2011/20110826\\_APGettingToZero\\_en.pdf](http://www.unaids.org/en/media/unaids/contentassets/documents/unaidspublication/2011/20110826_APGettingToZero_en.pdf) 2011;Accessed December 20, 2011.
12. Samnang P, Leng HB, Kim A, Canchola A, Moss A, Mandel JS, et al. HIV prevalence and risk factors among fishermen in Sihanouk Ville, Cambodia. *Int J STD AIDS* 2004;15(7):479-83.
13. Nishigaya K. Female garment factory workers in Cambodia: migration, sex work and HIV/AIDS. *Women Health* 2002;35(4):27-42.
14. Patterson D. Southeast Asia: national policy audits on HIV and migration. *HIV AIDS Policy Law Rev* 2005;10(3):31, 33.
15. Hor LB, Detels R, Heng S, Mun P. The role of sex worker clients in transmission of HIV in Cambodia. *Int J STD AIDS* 2005;16(2):170-4.

16. Maher L, Mooney-Somers J, Phlong P, Couture MC, Stein E, Evans J, et al. Selling sex in unsafe spaces: Sex work risk environments in Phnom Penh, Cambodia. *Harm Reduct J* 2011;8(1):30.
17. Plummer R. The sex industry in Cambodia: the traffic police. . *The Economist* June 11, 2009.
18. UNIAP. United Nations Inter-Agency Project on Human Trafficking (Phase III). Cambodia: Exodus to the sex trade? Effects of the global financial crisis on women's working conditions and opportunities. *Report* [http://www.no-trafficking.org/reports\\_docs/siren/siren\\_cb-04.pdf](http://www.no-trafficking.org/reports_docs/siren/siren_cb-04.pdf); Accessed August 31, 2009.
19. UNAIDS pr. More women in Cambodia turning to sex trade amid financial crisis – UN report. <http://www.un.org/apps/news/story.asp?NewsID=31541&Cr=human+trafficking&Cr1=> 2009.
20. KHANA. Mapping the pattern of sex workers, entertainment establishments, and men who have sex with men in Cambodia. Accessed July 9, 2011. Report by Hor Bun Leng, M.D, and Tuot Sovaranny, March. 2008.
21. Kim AA, Sun LP, Chhorvann C, Lindan C, Van Griensven F, Kilmarx PH, et al. High prevalence of HIV and sexually transmitted infections among indirect sex workers in Cambodia. *Sex Transm Dis* 2005;32(12):745-51.
22. Gorbach PM, Sopheab H, Chhorvann C, Weiss RE, Vun MC. Changing behaviors and patterns among Cambodian sex workers: 1997-2003. *Journal of Acquired Immune Deficiency Syndromes* 2006;42(2):242-7.
23. Ghys PD, Jenkins C, Pisani E. HIV surveillance among female sex workers. *Aids* 2001;15 Suppl 3:S33-40.
24. Francis C. HIV prevention and anti-trafficking in conflict? The public health consequences of Cambodia's fight against trafficking. FHI (in collaboration with PSI, Care, UNAIDS); December 2008.
25. FHI. SMARTgirl Program to Reduce Risk and Inspire Behavior Change. . [http://www.fhi.org/en/CountryProfiles/Cambodia/res\\_SMARTgirl.htm](http://www.fhi.org/en/CountryProfiles/Cambodia/res_SMARTgirl.htm) Accessed July 15th, 2011.
26. Burke KP, Munshaw S, Osburn WO, Levine J, Liu L, Sidney J, et al. Immunogenicity and cross-reactivity of a representative ancestral sequence in hepatitis C virus infection. *J Immunol* 2012;188(10):5177-88.
27. Lamptey PR. Reducing heterosexual transmission of HIV in poor countries. *Bmj Clinical Research Ed.* 2002;324(7331):207-11.
28. UNODC. Patterns and Trends of Amphetamine Type Stimulants and other drugs; Asia and the Pacific. *The Global SMART Programme (Synthetics Monitoring: Analyses, Reporting, Trends)* <http://www.unodc.org/unodc/en/scientists/smart.html> (Accessed January 5, 2012) 2011.
29. Ahmad K. Increased use of amphetamine-type stimulants threatens east Asian countries. *Lancet* 2002;359(9321):1927.
30. Ahmad K. Asia grapples with spreading amphetamine abuse. *Lancet* 2003;361(9372):1878-9.
31. Kulsudjarit K. Drug problem in southeast and southwest Asia. *Ann N Y Acad Sci* 2004;1025:446-57.
32. Farrell M, Marsden J, Ali R, Ling W. Methamphetamine: drug use and psychoses becomes a major public health issue in the Asia Pacific region. *Addiction* 2002;97(7):771-2.

- 1 33. Mongkolsirichaikul D, Mokkhaveva C, Ratanabanangkoon K. The incidence of  
2 amphetamine use among truck drivers from various regions of Thailand. *J Med*  
3 *Assoc Thai* 1988;71(9):471-4.
- 4 34. Vongsheree S, Sri-Ngam P, Ruchusatsawat N, Thaisri H, Puangtabtim W,  
5 Phutiprawan T, et al. High HIV-1 prevalence among metamphetamine users in  
6 central Thailand, 1999-2000. *J Med Assoc Thai* 2001;84(9):1263-7.
- 7 35. Dayrit FM, Dumlao MC. Impurity profiling of methamphetamine hydrochloride drugs  
8 seized in the Philippines. *Forensic Sci Int* 2004;144(1):29-36.
- 9 36. Lin SK, Ball D, Hsiao CC, Chiang YL, Ree SC, Chen CK. Psychiatric comorbidity and  
10 gender differences of persons incarcerated for methamphetamine abuse in  
11 Taiwan. *Psychiatry Clin Neurosci* 2004;58(2):206-12.
- 12 37. Lua AC, Lin HR, Tseng YT, Hu AR, Yeh PC. Profiles of urine samples from  
13 participants at rave party in Taiwan: prevalence of ketamine and MDMA abuse.  
14 *Forensic Sci Int* 2003;136(1-3):47-51.
- 15 38. Razak MH, Jittiwutikarn J, Suriyanon V, Vongchak T, Srirak N, Beyrer C, et al. HIV  
16 prevalence and risks among injection and noninjection drug users in northern  
17 Thailand: need for comprehensive HIV prevention programs. *J Acquir Immune*  
18 *Defic Syndr* 2003;33(2):259-66.
- 19 39. Couture MC, Evans JL, Sothy NS, Stein ES, Sichan K, Maher L, et al. Correlates of  
20 amphetamine-type stimulant use and associations with HIV-related risks among  
21 young women engaged in sex work in Phnom Penh, Cambodia. *Drug Alcohol*  
22 *Depend* 2012;120(1-3):119-26.
- 23 40. Melbye K, Khamboonruang C, Kunawararak P, Celentano DD, Prapamontol T, Nelson  
24 KE, et al. Lifetime correlates associated with amphetamine use among northern  
25 Thai men attending STD and HIV anonymous test sites. *Drug Alcohol Depend*  
26 2002;68(3):245-53.
- 27 41. Sattah MV, Supawitkul S, Dondero TJ, Kilmarx PH, Young NL, Mastro TD, et al.  
28 Prevalence of and risk factors for methamphetamine use in northern Thai youth:  
29 results of an audio-computer-assisted self-interviewing survey with urine testing.  
30 *Addiction* 2002;97(7):801-8.
- 31 42. Buavirat A, Page-Shafer K, van Griensven GJ, Mandel JS, Evans J, Chuaratanaphong  
32 J, et al. Risk of prevalent HIV infection associated with incarceration among  
33 injecting drug users in Bangkok, Thailand: case-control study. *BMJ*  
34 2003;326(7384):308.
- 35 43. Beyrer C, Razak MH, Jittiwutikarn J, Suriyanon V, Vongchak T, Srirak N, et al.  
36 Methamphetamine users in northern Thailand: changing demographics and risks  
37 for HIV and STD among treatment-seeking substance abusers. *Int J STD AIDS*  
38 2004;15(10):697-704.
- 39 44. Vanichseni S, Tappero JW, Pitisuttithum P, Kitayaporn D, Mastro TD, Vimutisunthorn  
40 E, et al. Recruitment, screening and characteristics of injection drug users  
41 participating in the AIDS-VAX B/E HIV vaccine trial, Bangkok, Thailand. *Aids*  
42 2004;18(2):311-6.
- 43 45. Maher L, Phlong P, Mooney-Somers J, Keo S, Stein E, Couture MC, et al.  
44 Amphetamine-type stimulant use and HIV/STI risk behaviour among young  
45 female sex workers in Phnom Penh, Cambodia. *Int J Drug Policy* 2011;22(3):203-  
46 9.
- 47 46. Kab V, Evans J, Sansothy N, Stein E, Couture M-C, Maher L, et al. Testing for  
48 amphetamine-type stimulant (ATS) use to ascertain validity of self-reported ATS  
49 use among young female sex workers in Cambodia. *Masters Thesis for University*  
50 *of California Berkeley, School of Public Health, MPH in Epidemiology and*  
51 *Biostatistics. Completed May 15, 2011.*
- 52
- 53
- 54
- 55
- 56
- 57
- 58
- 59
- 60

- 1 47. Chattergoon MA, Levine JS, Latanich R, Osburn WO, Thomas DL, Cox AL. High  
2 plasma interleukin-18 levels mark the acute phase of hepatitis C virus infection. *J*  
3 *Infect Dis* 2011;204(11):1730-40.
- 4 48. Yang C, Latkin C, Luan R, Nelson K. Condom use with female sex workers among  
5 male clients in Sichuan Province, China: the role of interpersonal and venue-level  
6 factors. *J Urban Health* 2010;87(2):292-303.
- 7 49. Erasquin JT, Reed E, Blankenship KM. Police-related experiences and HIV risk  
8 among female sex workers in Andhra Pradesh, India. *J Infect Dis* 2011;204 Suppl  
9 5:S1223-8.
- 10 50. Shannon K, Kerr T, Allinott S, Chettiar J, Shoveller J, Tyndall MW. Social and  
11 structural violence and power relations in mitigating HIV risk of drug-using  
12 women in survival sex work. *Soc Sci Med* 2008;66(4):911-21.
- 13 51. Shannon K, Kerr T, Strathdee SA, Shoveller J, Montaner JS, Tyndall MW. Prevalence  
14 and structural correlates of gender based violence among a prospective cohort of  
15 female sex workers. *BMJ* 2009;339:b2939.
- 16 52. Kalichman SC, Simbayi LC, Kaufman M, Cain D, Jooste S. Alcohol use and sexual  
17 risks for HIV/AIDS in sub-Saharan Africa: systematic review of empirical findings.  
18 *Prev Sci* 2007;8(2):141-51.
- 19 53. Morisky DE, Chiao C, Ksobiech K, Malow RM. Reducing alcohol use, sex risk  
20 behaviors, and sexually transmitted infections among Filipina female bar workers:  
21 effects of an ecological intervention. *J Prev Interv Community* 2010;38(2):104-  
22 17.
- 23 54. Surratt HL, Inciardi JA. An effective HIV risk-reduction protocol for drug-using  
24 female sex workers. *J Prev Interv Community* 2010;38(2):118-31.
- 25 55. Argento E, Reza-Paul S, Lorway R, Jain J, Bhagya M, Fathima M, et al. Confronting  
26 structural violence in sex work: lessons from a community-led HIV prevention  
27 project in Mysore, India. *Aids Care* 2011;23(1):69-74.
- 28 56. Reza-Paul S, Beattie T, Syed HU, Venukumar KT, Venugopal MS, Fathima MP, et al.  
29 Declines in risk behaviour and sexually transmitted infection prevalence following  
30 a community-led HIV preventive intervention among female sex workers in  
31 Mysore, India. *Aids* 2008;22 Suppl 5:S91-100.
- 32 57. Johnston LG, Sabin K, Mai TH, Pham TH. Assessment of respondent driven sampling  
33 for recruiting female sex workers in two Vietnamese cities: reaching the unseen  
34 sex worker. *J Urban Health* 2006;83(6 Suppl):i16-28.
- 35 58. Baral S, Beyrer C, Muessig K, Poteat T, Wirtz AL, Decker MR, et al. Burden of HIV  
36 among female sex workers in low-income and middle-income countries: a  
37 systematic review and meta-analysis. *Lancet Infect Dis* 2012;12(7):538-49.
- 38 59. Merson M, Padian N, Coates TJ, Gupta GR, Bertozzi SM, Piot P, et al. Combination  
39 HIV prevention. *Lancet* 2008;372(9652):1805-6.
- 40 60. Abdool Karim Q, Abdool Karim SS, Frohlich JA, Grobler AC, Baxter C, Mansoor LE, et  
41 al. Effectiveness and safety of tenofovir gel, an antiretroviral microbicide, for the  
42 prevention of HIV infection in women. *Science* 2010;329(5996):1168-74.
- 43 61. Grant RM, Lama JR, Anderson PL, McMahan V, Liu AY, Vargas L, et al. Preexposure  
44 chemoprophylaxis for HIV prevention in men who have sex with men. *N Engl J*  
45 *Med* 2010;363(27):2587-99.
- 46 62. Dworkin SL, Blankenship K. Microfinance and HIV/AIDS prevention: assessing its  
47 promise and limitations. *AIDS Behav* 2009;13(3):462-9.
- 48 63. Pronyk PM, Kim JC, Abramsky T, Phetla G, Hargreaves JR, Morison LA, et al. A  
49 combined microfinance and training intervention can reduce HIV risk behaviour in  
50 young female participants. *AIDS* 2008;22(13):1659-65.
- 51
- 52
- 53
- 54
- 55
- 56
- 57
- 58
- 59
- 60



- 1  
2  
3  
4  
5  
6  
7  
8  
9  
10  
11  
12  
13  
14  
15  
16  
17  
18  
19  
20  
21  
22  
23  
24  
25  
26  
27  
28  
29  
30  
31  
32  
33  
34  
35  
36  
37  
38  
39  
40  
41  
42  
43  
44  
45  
46  
47  
48  
49  
50  
51  
52  
53  
54  
55  
56  
57  
58  
59  
60
64. Rosenberg MS, Seavey BK, Jules R, Kershaw TS. The Role of a Microfinance Program on HIV Risk Behavior Among Haitian Women. *AIDS Behav* 2011;15(5):911-8.
65. Evans J, Couture M-C, Stein ES, Sansothy N, Maher L, Page K, et al. Biomarker validation of recent unprotected sexual intercourse in a prospective study of young women engaged in sex work in Phnom Penh, Cambodia. *STD* in press.
66. Kab V, Evans J, Sansothy N, Stein E, Couture M-C, Maher L, et al. Testing for amphetamine-type stimulant (ATS) use to ascertain validity of self-reported ATS use among young female sex workers in Cambodia. . *Addiction Science & Clinical Practice* 2012;7:11-25.
67. Tucker JD, Tuminez AS. Reframing the interpretation of sex worker health: a behavioral-structural approach. *J Infect Dis* 2011;204 Suppl 5:S1206-10.

**Table 1: Selected socio-demographic characteristics, occupational, and risk exposures in two cohorts of high risk young women in Phnom Penh, Cambodia: YWHS-1 (2006-2007) and YWHS-2 (2009-2010)**

| Characteristic                                               | YWHS-1<br>N=160                 |      | YWHS-2<br>N=153*                |      | p-value |
|--------------------------------------------------------------|---------------------------------|------|---------------------------------|------|---------|
|                                                              | Prevalence of<br>characteristic |      | Prevalence of<br>characteristic |      |         |
|                                                              | N                               | %    | N                               | %    |         |
| <b>Age (years, median (IQR))</b>                             | 25 (21 – 27)                    |      | 25 ( 22 – 28)                   |      | 0.56    |
| 16-18                                                        | 13                              | 8.1  | 11                              | 7.2  | 0.86    |
| 19-24                                                        | 64                              | 40.0 | 58                              | 37.9 |         |
| 25-29                                                        | 83                              | 51.8 | 84                              | 54.9 |         |
| <b>Marital status</b>                                        |                                 |      |                                 |      |         |
| Never married                                                | 57                              | 35.6 | 38                              | 24.8 | <0.01   |
| Married-living together                                      | 24                              | 15.0 | 48                              | 31.4 |         |
| Widowed/Divorced/Separated                                   | 79                              | 49.4 | 67                              | 43.8 |         |
| <b>Education (years)</b>                                     |                                 |      |                                 |      |         |
| None                                                         | 64                              | 40.0 | 23                              | 15.0 | <0.01   |
| Primary (1-6 years)                                          | 82                              | 51.3 | 91                              | 59.5 |         |
| Secondary (7+ years)                                         | 14                              | 8.8  | 39                              | 25.5 |         |
| <b>Age at first sex (median (IQR))</b>                       | 17 (16 – 18)                    |      | 18 ( 16 – 19)                   |      | 0.03    |
| ≤ 15                                                         | 32                              | 20.1 | 22                              | 14.5 | 0.19    |
| > 15                                                         | 127                             | 79.9 | 130                             | 85.5 |         |
| <b>Length of employment as FSW<br/>(years, median (IQR))</b> | 4.3 (2.5 – 6.3)                 |      | 3 (1.7 – 5)                     |      | <0.01   |
| <b>Current employment venue (last 30<br/>days)</b>           |                                 |      |                                 |      |         |
| Entertainment                                                | 51                              | 31.9 | 113                             | 74.3 | <0.01†  |
| Brothel                                                      | 23                              | 9.2  | 3                               | 2.0  |         |
| Freelance                                                    | 59                              | 39.3 | 29                              | 19.1 |         |
| Other/Multiple                                               | 27                              | 16.9 | 7                               | 4.6  |         |
| <b>Have a manager, boss or supervisor</b>                    |                                 |      |                                 |      |         |
| No                                                           | 82                              | 53.6 | 28                              | 14.4 | <0.01   |
| Yes                                                          | 71                              | 46.4 | 124                             | 81.6 |         |
| <b>Income in past month (US \$)</b>                          |                                 |      |                                 |      |         |
| Less than \$100                                              | 68                              | 42.5 | 50                              | 32.9 | 0.18    |
| 100-150\$                                                    | 35                              | 21.9 | 43                              | 29.3 |         |

|                                                            |              |      |             |      |       |
|------------------------------------------------------------|--------------|------|-------------|------|-------|
| Over 150\$                                                 | 57           | 35.6 | 59          | 38.8 |       |
|                                                            |              |      |             |      |       |
| <b>Number of sex partners in last month (median (IQR))</b> | 30 (10 – 90) |      | 5 (3 – 13)  |      | <0.01 |
| ≤10                                                        | 45           | 28.1 | 112         | 73.2 | <0.01 |
| 11 – 50                                                    | 53           | 33.1 | 41          | 26.8 |       |
| > 50                                                       | 62           | 38.8 | 0           | 0    |       |
|                                                            |              |      |             |      |       |
| <b>Condom use with last paying partner</b>                 |              |      |             |      |       |
| Consistent (always)                                        | 108          | 85.7 | 86          | 87.8 | 0.66  |
| Inconsistent                                               | 18           | 14.3 | 12          | 12.2 |       |
|                                                            |              |      |             |      |       |
| <b>Condom use with last non paying partner</b>             |              |      |             |      |       |
| Consistent (always)                                        | 7            | 20.6 | 10          | 18.2 | 0.78  |
| Inconsistent                                               | 27           | 79.4 | 45          | 81.8 |       |
|                                                            |              |      |             |      |       |
| <b>Number of days drink alcohol (last month)</b>           | 15 (2 – 30)  |      | 18 (5 – 28) |      | 0.76  |
| 0 – 4                                                      | 65           | 40.6 | 36          | 23.5 | <0.01 |
| 5 – 19                                                     | 25           | 15.6 | 42          | 27.5 |       |
| ≥ 20                                                       | 70           | 43.7 | 75          | 49.0 |       |
|                                                            |              |      |             |      |       |
| <b>Number of days drunk (last month)</b>                   | 5 (1 – 20)   |      | 3 (1 – 10)  |      | 0.07  |
| 0 – 4                                                      | 89           | 55.6 | 86          | 56.2 | <0.01 |
| 5 – 19                                                     | 33           | 20.6 | 50          | 32.7 |       |
| ≥ 20                                                       | 38           | 23.7 | 17          | 11.1 |       |
|                                                            |              |      |             |      |       |
| <b>ATS use (ever)</b>                                      |              |      |             |      |       |
| No                                                         | 92           | 57.5 | 107         | 69.9 | 0.02  |
| Yes                                                        | 68           | 42.5 | 46          | 30.1 |       |
|                                                            |              |      |             |      |       |
| <b>ATS use (last 3 months)</b>                             |              |      |             |      |       |
| No                                                         | 116          | 73.4 | 117         | 76.5 | 0.54  |
| Yes                                                        | 42           | 26.6 | 36          | 23.5 |       |
|                                                            |              |      |             |      |       |
| <b>Ever used any drug prior to/during sex</b>              |              |      |             |      |       |
| No                                                         | 109          | 68.1 | 117         | 76.5 | 0.10  |
| Yes                                                        | 51           | 31.9 | 36          | 23.5 |       |
|                                                            |              |      |             |      |       |

\* Excludes women who participated in YWHS-1

†Fisher Exact p-value



Table 2: HIV prevalence overall and by current work venue in two cohorts of young high risk women in Phnom Penh, Cambodia: YWHS-1 (2006-2007) and YWHS-2 (2009-2010)

| Characteristic                                    | YWHS-1<br>N=160 |                    | YWHS-2*<br>N=153* |                    | p-value |
|---------------------------------------------------|-----------------|--------------------|-------------------|--------------------|---------|
|                                                   | N               | % (95% CI)         | N                 | %                  |         |
| <b>HIV positive</b>                               | 37              | 23.1 (16.5 – 29.7) | 14                | 9.2 (4.5 – 13.8)   | <0.01   |
| <b>HIV positive by<br/>employment venue (n/N)</b> |                 |                    |                   |                    |         |
| Entertainment                                     | 5/51            | 9.8 (1.5 – 18.1)   | 5/113             | 4.4 (0.6 – 8.2)    | <0.01   |
| Brothel                                           | 4/23            | 17.4 (1.5 – 33.3)  | 0/3               | 0                  |         |
| Freelance                                         | 22/59           | 37.3 (25.0 – 48.0) | 9/29              | 31.0 (13.8 – 48.2) |         |
| Other/Multiple                                    | 6/27            | 22.2 (6.2 – 38.3)  | 0/7               | 0                  |         |

\* Excludes women who participated in YWHS-1

**Table 3: HIV testing history and behaviors in two cohorts of young high risk women in Phnom Penh, Cambodia: YWHS-1 (2006-2007) and YWHS-2 (2009-2010)**

| Characteristic                            | YWHS-1<br>N=160 |      | YWHS-2*<br>N=153* |      | p-value |
|-------------------------------------------|-----------------|------|-------------------|------|---------|
|                                           | N               | %    | N                 | %    |         |
| <b>Ever tested for HIV</b>                |                 |      |                   |      |         |
| No                                        | 58              | 36.5 | 31                | 20.3 | <0.01   |
| Yes                                       | 101             | 63.5 | 122               | 79.7 |         |
| <b>HIV test in last 3 months</b>          |                 |      |                   |      |         |
| No                                        | 126             | 79.3 | 119               | 77.8 | 0.75    |
| Yes                                       | 33              | 20.7 | 34                | 22.2 |         |
| <b>What was result of last HIV test?#</b> |                 |      |                   |      |         |
| Negative                                  | 84              | 84.0 | 114               | 93.4 | 0.04    |
| Positive                                  | 4               | 4.0  | 4                 | 3.3  |         |
| Don't know                                | 12              | 12.0 | 4                 | 3.3  |         |
| <b>Where received last HIV test#</b>      |                 |      |                   |      |         |
| Public hospital                           | 35              | 34.7 | 55                | 34.0 | 0.10    |
| Voluntary testing and counseling center   | 1               | 1.0  | 0                 | 0    |         |
| NGO clinic                                | 59              | 58.4 | 54                | 44.3 |         |
| Private hospital, clinic, or laboratory   | 6               | 5.9  | 13                | 10.7 |         |

\* Excludes women who participated in YWHS-1

# Among those who reported being previously tested for HIV

## Figure Legend

Figure 1: Venues where women in YWHS-2 and YWHS-2 reported ever working

Figure 2. Alcohol use in the past month and ATS use in the past 3 months reported by women in YWHS-1 and YWHS-2 by work venue: (A) Entertainment-based; (B) Brothel-based; (C) Freelance

For peer review only

1 Sex work and HIV in Cambodia: trajectories of risk and disease in two cohorts of high  
2 risk young women in Phnom Penh, Cambodia  
3  
4  
5  
6  
7  
8  
9

10 Kimberly Page, Ph.D.<sup>1</sup>, Ellen Stein, MPH<sup>1</sup>, Neth Sansothy, M.D.<sup>2</sup>, Jennifer Evans, M.S.<sup>1</sup>,  
11 Marie-Claude Couture, Ph.D.<sup>1</sup>, Keo Sichan<sup>3</sup>, Melissa Cockroft, BA<sup>3\*</sup>, Julie Mooney-  
12 Somers, Ph.D.<sup>4, 5</sup>, Pisith Phlong, M.A.<sup>6</sup>, John Kaldor, Ph.D.<sup>4</sup>, Lisa Maher Ph.D.<sup>4</sup>, (on  
13 behalf of the Young Women's Health Study Collaborative: John Kaldor, Ph.D.<sup>4</sup>, Serey  
14 Phal Kien<sup>3</sup>, Kimberly Page, Ph.D.<sup>1</sup>, Joel M. Palefsky M.D.<sup>7</sup>, Vonthanak Saphonn, M.D.<sup>2</sup>,  
15 Mean Chhi Vun, M.D.<sup>2</sup>).  
16  
17  
18  
19  
20  
21  
22  
23  
24  
25  
26  
27  
28

- 29 1. University of California San Francisco, Department of Epidemiology and Biostatistics;  
30 San Francisco, and Global Health Sciences, 50 Beale St., 12<sup>th</sup> Floor, San Francisco, CA,  
31 94105; USA  
32  
33
- 34 2. National Center for HIV/AIDS, Dermatology and STDs (NCHADS), #245H, Street 6A,  
35 Phum Kean Khlang, Sangkat Prekleap Russey Keo, Phnom Penh, Cambodia  
36  
37
- 38 3. Cambodian Women's Development Association (CWDA); No. 19, Street 242, Boeung  
39 Prolit, Khan 7 Makara, Phnom Penh, Cambodia  
40  
41
- 42 4. The Kirby Institute (formerly the National Centre in HIV Epidemiology and Clinical  
43 Research); University of New South Wales, CFI building, corner of West and Boundary  
44 Streets, Darlinghurst, NSW 2010, Australia  
45  
46
- 47 5. The Centre for Values, Ethics and the Law in Medicine, The University of Sydney  
48 Level 1 of the Medical Foundation Building, 92-94 Parramatta Road, Camperdown, NSW,  
49 Australia  
50  
51
- 52 6. Royal University of Fine Arts, 72 Street 19, Phnom Penh, Cambodia.  
53  
54  
55  
56  
57  
58  
59  
60

1  
2  
3  
4  
5  
6  
7  
8  
9  
10  
11  
12  
13  
14  
15  
16  
17  
18  
19  
20  
21  
22  
23  
24  
25  
26  
27  
28  
29  
30  
31  
32  
33  
34  
35  
36  
37  
38  
39  
40  
41  
42  
43  
44  
45  
46  
47  
48  
49  
50  
51  
52  
53  
54  
55  
56  
57  
58  
59  
60

7. University of California San Francisco, Department of Medicine; 513 Parnassus Ave,  
Med Sci S-420; UCSF, San Francisco, San Francisco, CA. 94143 - 0654

\*Melissa Cockroft is currently at Marie Stopes International in Phnom Pehn, Cambodia

Address correspondence to:

Kimberly Page, Ph.D., MPH, Dept. of Epidemiology and Biostatistics, Global Health  
Sciences, University of California San Francisco, CA 94105; 50 Beale St., 12<sup>th</sup> Floor, San  
Francisco, CA USA, 94105. [kpage@psg.ucsf.edu](mailto:kpage@psg.ucsf.edu)

Word count: Abstract: 296; Text 3444; 3 Tables, 2 Figures.

Key words: Cambodia, female sex workers, HIV, STI, risk, amphetamine-type  
stimulant, alcohol, policy effects

Short title: HIV infection and risk in two samples of FSW in Phnom Penh, Cambodia

## Abstract

**Objectives:** HIV prevalence among Cambodian female sex workers (FSW) is among the highest in Southeast Asia. We describe HIV prevalence and associated risk exposures in FSW sampled serially in Phnom Penh, Cambodia (Young Women's Health Study (YWHS), before and after the implementation of a new law designed to combat human trafficking and sexual exploitation.

**Design:** Cross-sectional analysis of baseline data from two prospective cohorts.

**Setting:** Community-based study in Phnom Penh, Cambodia.

**Participants:** Women aged 15-29 years, reporting  $\geq 2$  sexual partners in the last month and/or engaged in transactional sex in the last 3 months, were enrolled in the studies in 2007 (N=161; YWHS-1), and 2009 (N=220; YWHS-2) following information sessions where 285 and 345 women attended.

**Primary outcomes:** HIV prevalence, sexual risk behaviour, amphetamine-type stimulant (ATS) and alcohol use, and work-related factors were compared the two groups, enrolled before and after implementation of the new law.

**Results:** Participants and in the two cohorts were similar in age (median 25 years), but YWHS-2 women reported fewer sex partners, more alcohol use, and less ATS use. A higher proportion of YWHS-2 compared to YWHS-1 women worked in entertainment-based venues (68% vs. 31%, respectively). HIV prevalence was significantly lower in the more recently sampled women: 9.2% (95% CI 4.5, 13.8) vs. 23% (95% CI 16.5, 29.7).

**Conclusions:** Sex work context and risk has shifted among young FSW in Phnom Penh, following implementation of anti-prostitution and anti-trafficking laws. While both cohorts were recruited using the same eligibility criteria, more recently sampled women had lower prevalence of sexual risk and HIV infection. Women engaged more directly in transactional sex have become harder to sample and access. Future prevention

1 research and programs need to consider how new policies and demographic changes in  
2  
3  
4 FSW impact HIV transmission.  
5  
6  
7  
8  
9  
10  
11  
12  
13  
14  
15  
16  
17  
18  
19  
20  
21  
22  
23  
24  
25  
26  
27  
28  
29  
30  
31  
32  
33  
34  
35  
36  
37  
38  
39  
40  
41  
42  
43  
44  
45  
46  
47  
48  
49  
50  
51  
52  
53  
54  
55  
56  
57  
58  
59  
60

For peer review only

## Article summary

### Article Focus

- HIV prevalence and incidence in two serial samples of young female sex workers in Phnom Penh, Cambodia (2007-2008, and 2009-2010);
- Comparison of baseline risk and HIV outcomes, including sexual behavior, drug and alcohol use in the two cohorts sampled before and after implementation of anti-trafficking and sexual exploitation laws in 2008;
- Impact of anti-trafficking and sexual exploitation legislation on female sex workers and HIV risk.

### Key Messages

- Women sampled using the same eligibility criteria and outreach methods in differed with respect to risk exposures and HIV outcomes;
- Changes in sex work typology and environment are evident after enactment of the anti-trafficking laws, including very few brothel-based FSW and significantly more FSW based in the entertainment sector;
- Shifts in the context of sex work and risk highlight the ongoing need and challenges for HIV and drug prevention for young women engaged in sex work.

### Strengths and Limitations

- Two comparably sampled groups of young FSW suggest changing trends in HIV risk;
- Comparison of cross-sectional samples is ecological and does not prove temporal effects;
- Criminalization and suppression of sex work and a flourishing entertainment-based sex work industry set new and conflicting stage for HIV prevention.



1 Author Contributions: All authors contributed to the design and implementation of the  
2  
3 YWHS-1 and -2 studies. Authors KP, ES, JE, and LM compiled the first draft of the  
4  
5 manuscript, which was reviewed by NS, M-CC, KS, MC, JM\_S, PP, JK. The primary  
6  
7 statistical analysis was conducted by JE and M-CC; KS and MC provided supplemental  
8  
9 data review, and KP reviewed all data analyses. All authors contributed to and have  
10  
11 approved the final manuscript. The YWHS Collaborative is a steering committee who  
12  
13 reviewed and approved the study protocols, and provided expertise into some or all of  
14  
15 the studies' methods and implementation.  
16  
17  
18  
19  
20  
21

22 Data Sharing: no additional data available.  
23  
24  
25  
26

27 Funding sources and conflicts of interest: The Young Women's Health Study-1 and  
28  
29 YWHS-2 were supported by Awards 1R21DA025441 from the National Institute on Drug  
30  
31 Abuse, and R01NR010995 from the National Institute of Nursing Research. M-C Couture  
32  
33 was also supported by the Canadian Institutes of Health Research (postdoctoral  
34  
35 fellowship award). Professors Lisa Maher and John Kaldor are supported by Australian  
36  
37 National Health and Medical Research Council (NHMRC) Research Fellowship. The Kirby  
38  
39 Institute is affiliated with the Faculty of Medicine, University of New South Wales and is  
40  
41 funded by the Australian Government Department of Health and Ageing. The content is  
42  
43 solely the responsibility of the authors and does not necessarily represent the official  
44  
45 views of the National Institutes of Health, nor the Australian Government. The authors  
46  
47 have no conflicts to disclose.  
48  
49  
50  
51  
52  
53

54 Acknowledgments: The authors would like to acknowledge the coordinated efforts and  
55  
56 dedication of the research teams at the National Center for HIV/AIDS, Dermatology,  
57  
58 and STDs and the Cambodian Women's Development Agency. We are indebted to all the  
59  
60

1  
2  
3  
4  
5  
6  
7  
8  
9  
10  
11  
12  
13  
14  
15  
16  
17  
18  
19  
20  
21  
22  
23  
24  
25  
26  
27  
28  
29  
30  
31  
32  
33  
34  
35  
36  
37  
38  
39  
40  
41  
42  
43  
44  
45  
46  
47  
48  
49  
50  
51  
52  
53  
54  
55  
56  
57  
58  
59  
60

Cambodian women who agreed to participate in this study and grateful for the privilege to work with them.

For peer review only

## Introduction

There have been significant declines in HIV prevalence in Cambodia since the epidemic peaked in around 2000, a success widely attributed to measurable increases in condom use, declines in the number and frequency of commercial sex transactions reported by men, access to HIV voluntary counseling & testing (VCT) and uptake of antiretroviral therapy.<sup>1-3</sup> In 2010, the National Center for HIV/AIDS, Dermatology and STDs (NCHADS) revised the national estimate of HIV prevalence to 0.8% (in 15-49 year olds), reflecting a significant decline after the peak estimate of 2.4% in 1998.<sup>4</sup> However, HIV prevalence in Cambodian women, especially young women, is among the highest in Southeast Asia and heterosexual sex remains the main route of transmission.<sup>5-9</sup> Since 2006, women have accounted for over half (52%) of all HIV infections in Cambodia<sup>10</sup>, higher than in Asia and the Pacific in general (35%).<sup>11</sup> Limited income generating activities, a highly mobile workforce, trafficking in women and girls and widespread transactional sex, poverty, and sexually transmitted infections (STI) have been identified as key drivers of the epidemic among female sex workers (FSW).<sup>1 5 6 10 12-15</sup> As in many countries, FSW in Cambodia can be hard to reach and difficult to provide prevention services to. In recent years significant economic and policy changes have affected the sex work landscape, with notable shifts in sex work venues, typologies, and more women engaged in transactional sex than ever before.<sup>16-20</sup>

Until 2008, FSW in Cambodia were categorized as "direct" and were mostly brothel-based, or "indirect". Indirect FSW were distinguished from direct FSW, generally working in entertainment establishments as beer promotion girls, waitresses, hostesses, or karaoke girls for example, and engaged in occasional transactional sex for supplementary income.<sup>21-23</sup> In 1997, an estimated 5,300 women worked in the entertainment/service sector and 6,000 were brothel-based FSW. [The number of](#)

1 women involved in entertainment-based sex work has grown dramatically in recent  
2 years in Cambodia. Until 2008, the estimated number of women engaged in sex and  
3 entertainment work was stable (12,762 women were enumerated in 2008), however by  
4 2012, this had increased dramatically to an estimated 41,622 women, a more than  
5 threefold increase from the 2008 estimate (NCHADS, personal communication). The  
6 reasons for this growth have not been explored in detail, but may be associated with  
7 changing economic factors during this time in Cambodia. Following the passage and  
8 implementation of the "Law on Suppression of Human Trafficking and Sexual  
9 Exploitation" in February, 2008, brothel-based sex work was banned, and the most  
10 direct effect was on direct sex trade, which went "underground", or women moved into  
11 indirect work.<sup>10</sup> Along with the overt enforcement against FSW, the 2008 anti-  
12 trafficking legislation had other consequences. For instance, official terminology used by  
13 governmental and non-governmental organizations (NGO) to describe FSW labeled all  
14 women engaged in sex and entertainment work as "entertainment workers", or EW\*.  
15 Historically, brothel-based FSW were easily accessed and monitored for HIV prevention  
16 efforts, including HIV and behavioral surveillance. NGOs working in HIV prevention  
17 reported that as transactional sex was displaced to a wider range of settings, women at  
18 highest risk became harder to reach for both prevention and service delivery.<sup>16 24 25</sup>  
19 These factors pose significant challenges to HIV prevention and threaten to undermine  
20 progress achieved to date.

---

21  
22  
23  
24  
25  
26  
27  
28  
29  
30  
31  
32  
33  
34  
35  
36  
37  
38  
39  
40  
41  
42  
43  
44  
45  
46  
47  
48  
49  
50  
51  
52  
53  
54  
55  
56  
57  
58  
59  
60

\* The term 'female sex worker' is no longer used in Cambodia. Terminology was changed in 2008 to designate high risk women working in service and entertainment venues as "entertainment workers" or EW. No new HIV surveillance data has been published on FSW, and Behavioral Surveillance Survey (BSS) methods have been changed to recognize only indirect sex workers- 'EW', and determining whether or not they are selling sex by the average number of reported sex partners per week (10. UNAIDS. Cambodia Country Progress Report: Monitoring the Progress towards the Implementation of the Declaration of Commitment on HIV and AIDS. Reporting period: January 2010-December 2011. Prepared by National AIDS Authority for United Nations General Assembly Special Session (UNGASS). <http://www.unaids.org/en/regionscountries/countries/cambodia/> Accessed December 28, 2012..

1 HIV prevalence is extremely high among Cambodian FSW with prevalence among  
2 younger women is particularly troubling as their infection is likely to be more recent and  
3 indicative of incidence.<sup>5 8 9 21</sup> A cornerstone of HIV prevention in Cambodia was the  
4 100% Condom Use campaign<sup>26 27</sup>, primarily directed at brothel-based FSW. With  
5 changes in sex work venues, this prevention approach is likely less effective, failing to  
6 reach the large number of women now engaged in transactional sex in entertainment  
7 establishments. Indeed, measures of self-reported condom use have declined according  
8 to monitoring data reported by UNAIDS.<sup>10</sup> New risk factors have also emerged,  
9 especially amphetamine-type stimulant (ATS) use, in the form of “yama”, (pills) and  
10 “ice” (a crystalline form).<sup>28-38</sup> ATS use is associated with increased sexual risk behavior  
11 and STI incidence among these young women<sup>5 39</sup>, similar to that seen in other  
12 populations and locales.<sup>40-44</sup>

13 We conducted two prospective studies of high-risk young women engaged in  
14 transactional sex in Phnom Penh, [the principal research questions focused on estimating  
15 HIV and STI prevalence and incidence and associated risk factors](#). The first, Young  
16 Women’s Health Study (YWHS-1), was conducted in 2007-2008 and the second, YWHS-  
17 2, in 2009-2010.<sup>5 16 39 45 46</sup> In this paper, we explore the changing HIV risk landscape by  
18 comparing and contrasting the two cohorts of FSW sampled prior to, and following,  
19 legislative changes designed to combat human trafficking and sexual exploitation in  
20 Cambodia. [We theorize that the demographic characteristics and HIV risk of FSW has  
21 shifted as a result of socio-legal changes induced by the implementation of the new  
22 legislation.](#)

## 23 **Methods**

### 24 ***Study setting***

1 The YWHS-1 and YWHS-2 were both prospective studies of young women engaged in  
2 sex work in Phnom Penh, Cambodia. Methods have been described in detail previously.<sup>5</sup>  
3  
4  
5  
6 <sup>39</sup> Both studies were led by a multidisciplinary collaborative prevention research group  
7  
8 from NCHADS, the Cambodian Women's Development Association (CWDA), the  
9  
10 University of California in San Francisco (UCSF) in the United States, and the Kirby  
11  
12 Institute at the University of New South Wales (UNSW) in Australia.  
13  
14

### 15 16 17 **Study population and recruitment**

18  
19 The target population in both studies was young women engaged in transactional sex in  
20 Phnom Penh. Inclusion criteria were: aged 15-29 years, Khmer language  
21  
22 comprehension,  $\geq 2$  different sexual partners in the last month *or* engaged in  
23  
24 transactional sex (sex in exchange for money, goods, services, or drugs) within the last  
25  
26 three months, no plans to move in the next 12 months, biologically female, and able to  
27  
28 provide voluntary informed consent. YWHS-1 aimed to sample 160 women to provide  
29  
30 80% power to estimate a point prevalence of HIV at 15% with a 95% confidence  
31  
32 interval (CI) of 9.7% to 23.0%. Based on results of YWHS-1, YWHS-2 aimed to sample  
33  
34 220 women to detect an estimated HIV prevalence of 23% (95% CI, 17.3%, 30.5%).  
35  
36  
37  
38  
39  
40  
41  
42

43 Recruitment and enrollment procedures were the same in both studies.<sup>5</sup> CWDA field  
44  
45 assistants provided study information and conducted eligibility screening via information  
46  
47 meetings in neighborhoods where sex work was prevalent. Eligible women were invited  
48  
49 to a community location used by various sex-worker organizations where study  
50  
51 information was described in more detail and [written](#) informed consent was obtained.  
52  
53 Enrolled participants were given appointment cards to present to the YWHS clinic field-  
54  
55 site and free transportation was offered. [In both studies, women were remunerated](#)  
56  
57 [US\\$5 at each study visit for their participation time.](#)  
58  
59  
60

### **Data collection**

All data collection occurred at the YWHS clinic, which was staffed by a physician, nurses, counselors and a laboratory technician. A structured questionnaire was administered in Khmer by trained interviewers. Survey items were similar in both studies, and covered socio-demographic characteristics, occupational and sexual risk history, alcohol and drug use. HIV testing was conducted at each visit. In YWHS-1, urine specimens were tested for *Chlamydia trachomatis* (CT) and *Neisseria gonorrhoea* (GC). In YWHS-2, women were tested for HPV infection. STI treatment was provided at no cost, and women with HIV and HPV infection were referred to a local provider for free medical evaluation and treatment.

### **Laboratory testing**

HIV serology was performed using two rapid tests; Uni-Gold Recombigen<sup>™</sup> HIV rapid HIV test (Trinity Biotech USA, Jamestown, NY) and the Clairview HIV 1/2 STAT-PAK (Inverness Medical Diagnostics, Waltham, MA). HIV positive and discordant samples were confirmed by HIV-1 immunoblot. CT and GC were assessed from urine samples using BDProbeTec<sup>™</sup> strand displacement amplification assay (Becton Dickinson, Sparks, MD) at the NCHADS STD laboratory.<sup>5</sup> Cervical specimens for HPV testing were collected using a standard cytobrush.<sup>47</sup> Client-centered risk reduction counseling was provided in association with all testing.

### **Ethical review**

The study protocols were reviewed and approved by Institutional Review Board of the Committee on Human Research at UCSF, the Cambodian National Ethics Committee, and the University of New South Wales Human Research Ethics Committee in

1 accordance with ethical standards (institutional and national) and with the Helsinki  
2  
3 Declaration of 1975, as revised in 2000.  
4  
5  
6  
7

### 8 **Measures**

9  
10 Both studies aimed to estimate HIV infection, ATS use, and sexual risk behavior and  
11 included questions on sociodemographic factors, work history, income, and duration of  
12 sex work, and whether they currently had an employer (manager, boss or supervisor).  
13  
14 Women were asked if they had ever and/or were currently working: as a beer promoter,  
15 in a beer garden, as a waitress or hostess in a karaoke bar, nightclub or snooker bar, in  
16 a massage parlor, brothel, as a freelance sex worker using space at a brothel, as a  
17 freelance sex worker in the park or on the street, or to specify 'other' location. They  
18 were asked about age at first sex, number of partners (last month) and condom use  
19 with last partners (paying and non-paying). Paying partners were defined as male  
20 clients with whom respondents traded sex for money, goods or drugs. Condom use was  
21 classified as "consistent" if the participant reported always using a condom. Participants  
22 were asked about the number of days in which alcohol was drunk and the number of  
23 days in which they were "affected" by alcohol or were "drunk" in the past month. ATS  
24 use (ever and last 3 months) was assessed with questions regarding use of *yama* and  
25 crystal (ice).  
26  
27  
28  
29  
30  
31  
32  
33  
34  
35  
36  
37  
38  
39  
40  
41  
42  
43  
44  
45  
46

### 47 **Analyses**

48  
49 Prevalence estimates were calculated using exact binomial confidence intervals (CI).  
50  
51 Chi-square and Fisher's Exact Tests were used to examine differences in baseline socio-  
52 demographic, occupational, sexual, and alcohol/drug use exposures and prevalent HIV  
53 and STI between the two cohorts. The only longitudinal data compared was HIV  
54 incidence. The HIV incidence rate calculated using the number of seroconversions per  
55  
56  
57  
58  
59  
60



1 100 person-years of observation (PYO) assuming a Poisson distribution. Analyses were  
2 performed using STATA 9.0 (STATA, College Station, TX).  
3  
4  
5  
6  
7

## 8 **Results**

9  
10 In YWHS-1, 285 women attended community information sessions, 161 (56%) eligible  
11 women were recruited to the group information/consent meeting, and 160 (99%)  
12 consented to participate. In YWHS-2, 220 (64%) women consented out of 345 who  
13 attended information sessions. Sixty-seven women from YWHS-1 also enrolled in  
14 YWHS-2; they were not included in the YWHS-2 comparison group, leaving 153 in the  
15 analysis. Table 1 shows baseline socio-demographic and occupational factors, as well as  
16 sexual and substance use risk exposures, in the two cohorts. The cohorts were similar  
17 with respect to age (median 25 years), and age of sexual debut (median 17 and 18  
18 years, respectively), but differed significantly in years of education and marital status.  
19 Compared to women in YWHS-1, women in YWHS-2 had more education (median of 5  
20 years (IQR 2,7) vs. 2 years (IQR 0,4)), and were more likely to be married or  
21 cohabitating with a partner (31.4% vs. 15%, respectively).  
22  
23  
24  
25  
26  
27  
28  
29  
30  
31  
32  
33  
34  
35  
36  
37

38 Women in YWHS-2 had been involved in sex work for significantly less time (median of  
39 3 years (IQR 1.7, 5)) than YWHS-1 women (median of 4.3 years (IQR 2.5, 6.3)). More  
40 YWHS-2 women were currently (last 30 days) working in entertainment venues and  
41 fewer in brothels, or as freelance FSW (including in parks, guest houses, or on the  
42 street). These differences were also reflected in the significantly higher proportion of  
43 YWHS-2 women who reported having a manager or boss (81.6%) compared to YWHS-1  
44 (46%). Figure 1 shows the distribution and range of work venues women reported 'ever'  
45 working in. Women in YWHS-2 also reported significantly fewer sexual partners in the  
46 past 30 days: a median of 5 compared to 30 in YWHS-1 (Table 1). Despite these  
47 differences, women in the two samples reported similar income distributions. Self-  
48  
49  
50  
51  
52  
53  
54  
55  
56  
57  
58  
59  
60

1 reported consistent condom use, with both paying and non-paying partners, did not  
2  
3 differ between cohorts. Alcohol and ATS use differed significantly: women in YWHS-2  
4  
5 reported more alcohol use, but fewer days drunk in the past month than in YWHS-1;  
6  
7 and fewer women in YWHS-2 reported ever using ATS, although recent use was similar  
8  
9 in both groups (Table 1). Both alcohol and ATS use varied by cohort and work venue:  
10  
11 entertainment-based women in YWHS-2 reported less of both, whereas brothel and  
12  
13 freelance-based women in YWHS-2 reported significantly more ATS use (Figure 2).  
14  
15  
16  
17  
18  
19

20  
21 HIV prevalence was significantly ( $p < 0.01$ ) lower in women sampled in YWHS-2  
22  
23 compared to YWHS-1: 9.2% (95% CI 4.5%, 13.8%;  $p < 0.01$ ) vs. 23% (95% CI 16.5%,  
24  
25 29.7%) (Table 2). [When the 67 women who had participated in both samples were](#)  
26  
27 [included in YWHS-2, HIV prevalence was 15.5% \(95% CI 10.6, 20.3\).](#) HIV incidence  
28  
29 was also lower in YWHS-2: 0.8/100 pyo (95% CI 0.1, 6.0) vs. 3.6/100 pyo (95% CI  
30  
31 1.2, 11.1), but not significantly ( $p = 0.26$ ). In YWHS-1, prevalence of Chlamydia infection  
32  
33 was 11.5% (95% CI 6.0%, 17.1%) and Gonorrhoea infection was 7.8% (95% CI 3.5%,  
34  
35 12.3%). Women in YWHS-2 were not tested for these STI, but 41.1% were HPV. HIV  
36  
37 prevalence differed significantly by work venue and by cohort, but over 30% of  
38  
39 freelance-based women tested positive in both cohorts (Table 2).  
40  
41  
42  
43

44 In both cohorts, 20% reported being tested for HIV in the past 3 months but more  
45  
46 YWHS-2 women had a history of testing (Table 3). More women in YWHS-1 reported not  
47  
48 knowing their HIV test results: 11 of the 84 women (13.1%) who reported being  
49  
50 negative tested positive and 4 of 12 women (33.3%) who reported they did not know  
51  
52 their previous HIV results tested positive. In YWHS-2, 5 of 114 (4.4%) who reported  
53  
54 testing negative, and 2 of 4 (50%) who did not know their previous results, tested  
55  
56  
57  
58  
59  
60

1 positive. Among women who reported no history of HIV testing, 31% (18/58) and  
2  
3  
4 12.9% (4/31) tested HIV positive in YWHS-1 and -2, respectively.  
5  
6  
7  
8

## 9 **Discussion**

10  
11  
12 In these two samples of young FSW, recruited using the same eligibility criteria and  
13  
14 outreach methods, we observed important differences in socio-demographics, risk  
15  
16 exposures and HIV infection outcomes. Most notably, women sampled more recently  
17  
18 were more educated, had fewer sex partners, less time working in sex work and had  
19  
20 significantly lower prevalence of HIV. Where women worked was also very different in  
21  
22 the two cohorts: a much higher proportion of women sampled in 2009-10 compared to  
23  
24 2007-8 worked in entertainment-based establishments and fewer were brothel-based or  
25  
26 freelance FSW. These differences point to the notable changes in sex work typology and  
27  
28 environment that occurred following the enactment and enforcement in 2008 of anti-  
29  
30 trafficking legislation in Cambodia<sup>16</sup>. Brothel closures and increases in policing have  
31  
32 been acknowledged as a cause of significant social and occupational upheaval among  
33  
34 FSW, driving many women, especially former brothel-based FSW, "underground".<sup>10</sup> Both  
35  
36 government agencies and NGOs in Phnom Penh have reported negative impacts of the  
37  
38 legislation on FSW including: displacement and harassment and reduced access to  
39  
40 condoms and health care.<sup>10 20 24</sup> In our qualitative research, women confirmed these  
41  
42 impacts, describing how they moved to new venues or locales for sex work transactions  
43  
44 including apartments or houses rented by brothel owners following brothel closures<sup>16</sup>,  
45  
46 raising concerns about increased risks of HIV transmission as a result of the increasingly  
47  
48 clandestine nature of direct sex work. [The significant increases in the number of women  
49  
50 involved in sex work also warrant attention.](#)  
51  
52  
53  
54  
55  
56  
57  
58  
59  
60

1 The differences in HIV prevalence, risk profiles, and sex work environments reported by  
2 these two samples are consistent with both quantitative and qualitative research  
3 demonstrating how socio-political and environmental factors can increase vulnerability  
4 to HIV among FSW.<sup>48-51</sup> The time period in which these two cohorts were sampled,  
5 corresponded with increased criminalization of sex work which impacted the number  
6 and settings of transactional sex. These shifts can have mixed effects. First, women  
7 engaged in entertainment-based work have lower risk profiles than women engaged in  
8 freelance sex work.<sup>5</sup> The shorter duration of sex work reported by entertainment-based  
9 FSW likely contributes to the lower HIV prevalence in this group. Protective effects of  
10 entertainment-based work may include having a boss or manager; odds of HIV among  
11 women who say they have a boss or manager are lower compared to women who do  
12 not (OR: 0.40; 95% CI 0.19, 0.90).<sup>5</sup> We also explored these factors in qualitative  
13 interviews with FSW.<sup>16</sup> Brothel and entertainment-based sex workers reported that the  
14 'boss/manager' mitigated risk of violence from clients and problems with police. Also,  
15 women working in entertainment establishments report earning up to three times more  
16 (US \$50-\$60 or in \$200,000-\$240,000 Cambodian Riel) per client than women who  
17 worked in brothels or streets and parks.<sup>16</sup> This is substantiated by the two cohorts'  
18 report of similar income levels despite differences in the number of sex partners. It is  
19 also possible that entertainment-based FW have lower risk partners than brothel-based  
20 and freelance FSW. **Despite the lower prevalence of HIV and the lower number of male  
21 sex partners reported by this growing group of FSW, there is significant potential for  
22 amplified transmission of HIV at a population level, given the extraordinary growth in  
23 the size of the population, especially if male partners bridge to women who are not  
24 involved in transactional sex.**

1 The two cohorts also showed differences in drug and alcohol use exposures. Our group  
2 has identified ATS use as a significant independent risk factor for HIV related risk  
3 behaviour including number of sex partners (Adjusted Risk Ratio (ARR): 1.49; 95% CI  
4 1.0, 2.21) and incident STI (AOR: 5.41; 95% CI 1.15, 25.48)<sup>39</sup>. Alcohol use is also  
5 emerging as a potential HIV-related risk factor<sup>16</sup>, although not well quantified among  
6 FSW, especially those working in entertainment establishments (or their male partners).  
7 Entertainment venues largely revolve around alcohol, and women working at these are  
8 generally employed as hostesses, waitresses, or as “promoters” such as “beer  
9 promotion girls” in a variety of venues.<sup>16 21</sup> Women who were working in the  
10 entertainment sector were more likely to both report more days of drinking, and more  
11 days intoxicated, than brothel or street-based FSW. Alcohol use can be a barrier to  
12 effective condom use and condom negotiation in the transactional context.<sup>16 52</sup> **Although**  
13 **women in the two samples did not report differences in inconsistent condom use, we**  
14 **have previously found** that women who report heavy alcohol use are also significantly  
15 more likely to report inconsistent condom use.<sup>39</sup> Given how entwined drug and alcohol  
16 use are with sex work, especially in the growing entertainment-based sector, there is a  
17 significant need to better elucidate ways to mitigate HIV-associated risks among women  
18 whose livelihood depends on working in these establishments. Designing and  
19 implementing prevention in these contexts will require input, not only from working  
20 women, but also from the wider business sector, as well as male clients.<sup>48 53-56</sup>

21 The differences in HIV and risk profiles between the women in our two samples, as well  
22 as outreach efforts by HIV prevention organizations, may be a result of reaching “low  
23 hanging fruit” resulting from both substantive increases in the number of women  
24 working in entertainment establishments, and the increased challenges of engaging  
25 women with higher risk and who are HIV infected for the reasons described above. FSW

1 in Phnom Penh have historically been easily accessed for prevention and surveillance  
2 efforts. However, recent changes in the sex work landscape suggest that alternative  
3 sampling methods, such as respondent driven sampling, may result in better access to  
4 higher risk women who are more hidden and therefore hard to reach in this new legal  
5 climate.<sup>57</sup>

6  
7  
8  
9  
10  
11  
12  
13  
14  
15 HIV prevention remains an important and essential priority for all women engaged in  
16 transactional sex. A recent systematic review confirms that FSW in Asia have the  
17 highest odds of infection compared to women of reproductive age in the general  
18 population.<sup>58</sup> In addition to new structural interventions aimed at reducing risk in the  
19 work-based environment, the very high prevalence and risk of HIV among FSW in  
20 Cambodia suggests a need for combination HIV prevention interventions including  
21 biomedical (pre-exposure prophylaxis, microbicides, and treatment as prevention),  
22 behavioural and development approaches (such as microfinance or income generating  
23 opportunities).<sup>59-64</sup>

24  
25  
26  
27  
28  
29  
30  
31  
32  
33  
34  
35  
36  
37  
38 Several limitations of these analyses should be noted. First results presented here are  
39 cross-sectional and thus associations do not reflect causality. The comparison of the  
40 serial samples is ecological in nature and does not prove temporal effects. The sample  
41 sizes are small and thus subject to limitations with respect to generalizability. Many  
42 exposures are self-reported and thus may reflect social desirability bias, especially  
43 condom use which we have found has been over-reported based on biomarker data.<sup>65</sup>  
44  
45  
46  
47  
48  
49  
50  
51  
52 On the other hand, we have found that self-reported ATS use is accurate compared to  
53 urine toxicology screening, suggesting that measures of drug and alcohol use in this  
54 group are accurate.<sup>66</sup>

1 Results from this analysis provide important insights into recent shifts in the context of  
2 sex work and risk in young FSW in Phnom Penh, highlight challenges to HIV prevention  
3 in this environment, and also point to the need for more research. Conflicting trends,  
4 including the criminalization and suppression of direct sex work while the indirect  
5 entertainment-based sex work industry is flourishing, has potentially set a new stage.  
6 Unless there is acknowledgment and access to women who are more directly engaged in  
7 sex work, these women will be poorly represented in any national HIV or behavioural  
8 surveillance. They will remain hidden and stigmatized, subject to repression, violence  
9 and potentially with less access to prevention or care. While the 100% condom use  
10 program had its criticisms, that policy at least acknowledged the existence and need for  
11 HIV prevention at a multisectoral level for FSW. The current socio-political climate has  
12 potentially reversed these benefits, by denying the existence of FSW. Further in-depth  
13 research among both FSW, their male clients and among entertainment venue  
14 management would help to elucidate the impacts, both positive and negative of these  
15 new laws. The exponential growth of entertainment-based sex work has the potential to  
16 result in an expanding HIV epidemic among young women in Cambodia. From a  
17 programmatic perspective entertainment-based FSW are much easier to reach but likely  
18 require different HIV prevention interventions than the 100% condom use program.  
19 Implementation of research and programmatic efforts that integrate health, social  
20 empowerment, and safe work environments for HIV prevention remain a high priority  
21 for women engaged in sex work in Cambodia.<sup>67</sup>



## References

1. NCHADS. Ministry of Health National Center for HIV, AIDS, Dermatology and STDs. Annual Report 2009: National Centre for HIV/AIDS, Dermatology and STDs, Cambodia; <http://www.nchads.org/report.php>; Accessed July 8, 2011, 2011.
2. Saphonn V, Sopheab H, Sun LP, Vun MC, Wantha SS, Gorbach PM, et al. Current HIV/AIDS/STI epidemic: intervention programs in Cambodia, 1993-2003. *AIDS Educ Prev* 2004;16(3 Suppl A):64-77.
3. NCHADS. Behavioral Sentinel Surveillance 2010. *Cambodia National Center for HIV, AIDS, Dermatology and STD Dissemination Conference, December 30, 2010* 2011.
4. NCHADS. Ministry of Health National Center for HIV, AIDS, Dermatology and STDs. Estimation of the HIV prevalence among the general population in Cambodia. : National Centre for HIV/AIDS, Dermatology and STDs, Cambodia; <http://www.nchads.org/index.php?id=20&event=146> Accessed July 8, 2011, 2011.
5. Couture MC, Sansothy N, Saphonn V, Phal S, Sichan K, Stein E, et al. Young women engaged in sex work in Phnom Penh, Cambodia, have high incidence of HIV and sexually transmitted infections, and amphetamine-type stimulant use: new challenges to HIV prevention and risk. *Sex Transm Dis* 2011;38(1):33-9.
6. Sopheab H, Saphonn V, Chhea C, Fylkesnes K. Distribution of HIV in Cambodia: findings from the first national population survey. *AIDS* 2009;23(11):1389-95.
7. Sopheab H, Morineau G, Neal JJ, Saphonn V, Fylkesnes K. Sustained high prevalence of sexually transmitted infections among female sex workers in Cambodia: high turnover seriously challenges the 100% Condom Use Programme. *BMC Infect Dis* 2008;8:167.
8. Sopheab H, Gorbach PM, Gloyd S, Leng HB. Rural sex work in Cambodia: work characteristics, risk behaviours, HIV, and syphilis. *Sex Transm Infect* 2003;79(4):e2.
9. Saphonn V, Parekh BS, Dobbs T, Mean C, Bun LH, Ly SP, et al. Trends of HIV-1 Seroincidence Among HIV-1 Sentinel Surveillance Groups in Cambodia, 1999-2002. *J Acquir Immune Defic Syndr* 2005;39(5):587-92.
10. UNAIDS. Cambodia Country Progress Report: Monitoring the Progress towards the Implementation of the Declaration of Commitment on HIV and AIDS. Reporting period: January 2010-December 2011. Prepared by National AIDS Authority for United Nations General Assembly Special Session (UNGASS). . <http://www.unaids.org/en/regionscountries/countries/cambodia/> Accessed December 28, 2012.
11. UNAIDS. HIV in Asia and the Pacific: Getting to Zero. [http://www.unaids.org/en/media/unaids/contentassets/documents/unaidspublication/2011/20110826\\_APGettingToZero\\_en.pdf](http://www.unaids.org/en/media/unaids/contentassets/documents/unaidspublication/2011/20110826_APGettingToZero_en.pdf) 2011;Accessed December 20, 2011.
12. Samnang P, Leng HB, Kim A, Canchola A, Moss A, Mandel JS, et al. HIV prevalence and risk factors among fishermen in Sihanouk Ville, Cambodia. *Int J STD AIDS* 2004;15(7):479-83.
13. Nishigaya K. Female garment factory workers in Cambodia: migration, sex work and HIV/AIDS. *Women Health* 2002;35(4):27-42.
14. Patterson D. Southeast Asia: national policy audits on HIV and migration. *HIV AIDS Policy Law Rev* 2005;10(3):31, 33.
15. Hor LB, Detels R, Heng S, Mun P. The role of sex worker clients in transmission of HIV in Cambodia. *Int J STD AIDS* 2005;16(2):170-4.



16. Maher L, Mooney-Somers J, Phlong P, Couture MC, Stein E, Evans J, et al. Selling sex in unsafe spaces: Sex work risk environments in Phnom Penh, Cambodia. *Harm Reduct J* 2011;8(1):30.
17. Plummer R. The sex industry in Cambodia: the traffic police. . *The Economist* June 11, 2009.
18. UNIAP. United Nations Inter-Agency Project on Human Trafficking (Phase III). Cambodia: Exodus to the sex trade? Effects of the global financial crisis on women's working conditions and opportunities. Report [http://www.no-trafficking.org/reports\\_docs/siren/siren\\_cb-04.pdf](http://www.no-trafficking.org/reports_docs/siren/siren_cb-04.pdf); Accessed August 31, 2009.
19. UNAIDS pr. More women in Cambodia turning to sex trade amid financial crisis – UN report. <http://www.un.org/apps/news/story.asp?NewsID=31541&Cr=human+trafficking&Cr1=> 2009.
20. KHANA. Mapping the pattern of sex workers, entertainment establishments, and men who have sex with men in Cambodia. Accessed July 9, 2011. Report by Hor Bun Leng, M.D, and Tuot Sovaranny, March. 2008.
21. Kim AA, Sun LP, Chhorvann C, Lindan C, Van Griensven F, Kilmarx PH, et al. High prevalence of HIV and sexually transmitted infections among indirect sex workers in Cambodia. *Sex Transm Dis* 2005;32(12):745-51.
22. Gorbach PM, Sopheab H, Chhorvann C, Weiss RE, Vun MC. Changing behaviors and patterns among Cambodian sex workers: 1997-2003. *Journal of Acquired Immune Deficiency Syndromes* 2006;42(2):242-7.
23. Ghys PD, Jenkins C, Pisani E. HIV surveillance among female sex workers. *Aids* 2001;15 Suppl 3:S33-40.
24. Francis C. HIV prevention and anti-trafficking in conflict? The public health consequences of Cambodia's fight against trafficking. FHI (in collaboration with PSI, Care, UNAIDS); December 2008.
25. FHI. SMARTgirl Program to Reduce Risk and Inspire Behavior Change. . [http://www.fhi.org/en/CountryProfiles/Cambodia/res\\_SMARTgirl.htm](http://www.fhi.org/en/CountryProfiles/Cambodia/res_SMARTgirl.htm) Accessed July 15th, 2011.
26. Burke KP, Munshaw S, Osburn WO, Levine J, Liu L, Sidney J, et al. Immunogenicity and cross-reactivity of a representative ancestral sequence in hepatitis C virus infection. *J Immunol* 2012;188(10):5177-88.
27. Lamptey PR. Reducing heterosexual transmission of HIV in poor countries. *Bmj Clinical Research Ed.* 2002;324(7331):207-11.
28. UNODC. Patterns and Trends of Amphetamine Type Stimulants and other drugs; Asia and the Pacific. *The Global SMART Programme (Synthetics Monitoring: Analyses, Reporting, Trends)* <http://www.unodc.org/unodc/en/scientists/smart.html> (Accessed January 5, 2012) 2011.
29. Ahmad K. Increased use of amphetamine-type stimulants threatens east Asian countries. *Lancet* 2002;359(9321):1927.
30. Ahmad K. Asia grapples with spreading amphetamine abuse. *Lancet* 2003;361(9372):1878-9.
31. Kulsudjarit K. Drug problem in southeast and southwest Asia. *Ann N Y Acad Sci* 2004;1025:446-57.
32. Farrell M, Marsden J, Ali R, Ling W. Methamphetamine: drug use and psychoses becomes a major public health issue in the Asia Pacific region. *Addiction* 2002;97(7):771-2.

- 1 33. Mongkolsirichaikul D, Mokkhavesa C, Ratanabanangkoon K. The incidence of  
2 amphetamine use among truck drivers from various regions of Thailand. *J Med*  
3 *Assoc Thai* 1988;71(9):471-4.
- 4 34. Vongsheree S, Sri-Ngam P, Ruchusatsawat N, Thaisri H, Puangtabtim W,  
5 Phutiprawan T, et al. High HIV-1 prevalence among metamphetamine users in  
6 central Thailand, 1999-2000. *J Med Assoc Thai* 2001;84(9):1263-7.
- 7 35. Dayrit FM, Dumlao MC. Impurity profiling of methamphetamine hydrochloride drugs  
8 seized in the Philippines. *Forensic Sci Int* 2004;144(1):29-36.
- 9 36. Lin SK, Ball D, Hsiao CC, Chiang YL, Ree SC, Chen CK. Psychiatric comorbidity and  
10 gender differences of persons incarcerated for methamphetamine abuse in  
11 Taiwan. *Psychiatry Clin Neurosci* 2004;58(2):206-12.
- 12 37. Lua AC, Lin HR, Tseng YT, Hu AR, Yeh PC. Profiles of urine samples from  
13 participants at rave party in Taiwan: prevalence of ketamine and MDMA abuse.  
14 *Forensic Sci Int* 2003;136(1-3):47-51.
- 15 38. Razak MH, Jittiwutikarn J, Suriyanon V, Vongchak T, Srirak N, Beyrer C, et al. HIV  
16 prevalence and risks among injection and noninjection drug users in northern  
17 Thailand: need for comprehensive HIV prevention programs. *J Acquir Immune*  
18 *Defic Syndr* 2003;33(2):259-66.
- 19 39. Couture MC, Evans JL, Sothy NS, Stein ES, Sichan K, Maher L, et al. Correlates of  
20 amphetamine-type stimulant use and associations with HIV-related risks among  
21 young women engaged in sex work in Phnom Penh, Cambodia. *Drug Alcohol*  
22 *Depend* 2012;120(1-3):119-26.
- 23 40. Melbye K, Khamboonruang C, Kunawararak P, Celentano DD, Prapamontol T, Nelson  
24 KE, et al. Lifetime correlates associated with amphetamine use among northern  
25 Thai men attending STD and HIV anonymous test sites. *Drug Alcohol Depend*  
26 2002;68(3):245-53.
- 27 41. Sattah MV, Supawitkul S, Dondero TJ, Kilmarx PH, Young NL, Mastro TD, et al.  
28 Prevalence of and risk factors for methamphetamine use in northern Thai youth:  
29 results of an audio-computer-assisted self-interviewing survey with urine testing.  
30 *Addiction* 2002;97(7):801-8.
- 31 42. Buavirat A, Page-Shafer K, van Griensven GJ, Mandel JS, Evans J, Chuaratanaphong  
32 J, et al. Risk of prevalent HIV infection associated with incarceration among  
33 injecting drug users in Bangkok, Thailand: case-control study. *BMJ*  
34 2003;326(7384):308.
- 35 43. Beyrer C, Razak MH, Jittiwutikarn J, Suriyanon V, Vongchak T, Srirak N, et al.  
36 Methamphetamine users in northern Thailand: changing demographics and risks  
37 for HIV and STD among treatment-seeking substance abusers. *Int J STD AIDS*  
38 2004;15(10):697-704.
- 39 44. Vanichseni S, Tappero JW, Pitisuttithum P, Kitayaporn D, Mastro TD, Vimutisunthorn  
40 E, et al. Recruitment, screening and characteristics of injection drug users  
41 participating in the AIDS-VAX B/E HIV vaccine trial, Bangkok, Thailand. *Aids*  
42 2004;18(2):311-6.
- 43 45. Maher L, Phlong P, Mooney-Somers J, Keo S, Stein E, Couture MC, et al.  
44 Amphetamine-type stimulant use and HIV/STI risk behaviour among young  
45 female sex workers in Phnom Penh, Cambodia. *Int J Drug Policy* 2011;22(3):203-  
46 9.
- 47 46. Kab V, Evans J, Sansothy N, Stein E, Couture M-C, Maher L, et al. Testing for  
48 amphetamine-type stimulant (ATS) use to ascertain validity of self-reported ATS  
49 use among young female sex workers in Cambodia. *Masters Thesis for University*  
50 *of California Berkeley, School of Public Health, MPH in Epidemiology and*  
51 *Biostatistics. Completed May 15, 2011.*
- 52  
53  
54  
55  
56  
57  
58  
59  
60

- 1 47. Chattergoon MA, Levine JS, Latanich R, Osburn WO, Thomas DL, Cox AL. High  
2 plasma interleukin-18 levels mark the acute phase of hepatitis C virus infection. *J*  
3 *Infect Dis* 2011;204(11):1730-40.
- 4 48. Yang C, Latkin C, Luan R, Nelson K. Condom use with female sex workers among  
5 male clients in Sichuan Province, China: the role of interpersonal and venue-level  
6 factors. *J Urban Health* 2010;87(2):292-303.
- 7 49. Erausquin JT, Reed E, Blankenship KM. Police-related experiences and HIV risk  
8 among female sex workers in Andhra Pradesh, India. *J Infect Dis* 2011;204 Suppl  
9 5:S1223-8.
- 10 50. Shannon K, Kerr T, Allinott S, Chettiar J, Shoveller J, Tyndall MW. Social and  
11 structural violence and power relations in mitigating HIV risk of drug-using  
12 women in survival sex work. *Soc Sci Med* 2008;66(4):911-21.
- 13 51. Shannon K, Kerr T, Strathdee SA, Shoveller J, Montaner JS, Tyndall MW. Prevalence  
14 and structural correlates of gender based violence among a prospective cohort of  
15 female sex workers. *BMJ* 2009;339:b2939.
- 16 52. Kalichman SC, Simbayi LC, Kaufman M, Cain D, Jooste S. Alcohol use and sexual  
17 risks for HIV/AIDS in sub-Saharan Africa: systematic review of empirical findings.  
18 *Prev Sci* 2007;8(2):141-51.
- 19 53. Morisky DE, Chiao C, Ksobiech K, Malow RM. Reducing alcohol use, sex risk  
20 behaviors, and sexually transmitted infections among Filipina female bar workers:  
21 effects of an ecological intervention. *J Prev Interv Community* 2010;38(2):104-  
22 17.
- 23 54. Surratt HL, Inciardi JA. An effective HIV risk-reduction protocol for drug-using  
24 female sex workers. *J Prev Interv Community* 2010;38(2):118-31.
- 25 55. Argento E, Reza-Paul S, Lorway R, Jain J, Bhagya M, Fathima M, et al. Confronting  
26 structural violence in sex work: lessons from a community-led HIV prevention  
27 project in Mysore, India. *Aids Care* 2011;23(1):69-74.
- 28 56. Reza-Paul S, Beattie T, Syed HU, Venukumar KT, Venugopal MS, Fathima MP, et al.  
29 Declines in risk behaviour and sexually transmitted infection prevalence following  
30 a community-led HIV preventive intervention among female sex workers in  
31 Mysore, India. *Aids* 2008;22 Suppl 5:S91-100.
- 32 57. Johnston LG, Sabin K, Mai TH, Pham TH. Assessment of respondent driven sampling  
33 for recruiting female sex workers in two Vietnamese cities: reaching the unseen  
34 sex worker. *J Urban Health* 2006;83(6 Suppl):i16-28.
- 35 58. Baral S, Beyrer C, Muessig K, Poteat T, Wirtz AL, Decker MR, et al. Burden of HIV  
36 among female sex workers in low-income and middle-income countries: a  
37 systematic review and meta-analysis. *Lancet Infect Dis* 2012;12(7):538-49.
- 38 59. Merson M, Padian N, Coates TJ, Gupta GR, Bertozzi SM, Piot P, et al. Combination  
39 HIV prevention. *Lancet* 2008;372(9652):1805-6.
- 40 60. Abdool Karim Q, Abdool Karim SS, Frohlich JA, Grobler AC, Baxter C, Mansoor LE, et  
41 al. Effectiveness and safety of tenofovir gel, an antiretroviral microbicide, for the  
42 prevention of HIV infection in women. *Science* 2010;329(5996):1168-74.
- 43 61. Grant RM, Lama JR, Anderson PL, McMahan V, Liu AY, Vargas L, et al. Preexposure  
44 chemoprophylaxis for HIV prevention in men who have sex with men. *N Engl J*  
45 *Med* 2010;363(27):2587-99.
- 46 62. Dworkin SL, Blankenship K. Microfinance and HIV/AIDS prevention: assessing its  
47 promise and limitations. *AIDS Behav* 2009;13(3):462-9.
- 48 63. Pronyk PM, Kim JC, Abramsky T, Phetla G, Hargreaves JR, Morison LA, et al. A  
49 combined microfinance and training intervention can reduce HIV risk behaviour in  
50 young female participants. *AIDS* 2008;22(13):1659-65.
- 51
- 52
- 53
- 54
- 55
- 56
- 57
- 58
- 59
- 60

- 1  
2  
3  
4  
5  
6  
7  
8  
9  
10  
11  
12  
13  
14  
15  
16  
17  
18  
19  
20  
21  
22  
23  
24  
25  
26  
27  
28  
29  
30  
31  
32  
33  
34  
35  
36  
37  
38  
39  
40  
41  
42  
43  
44  
45  
46  
47  
48  
49  
50  
51  
52  
53  
54  
55  
56  
57  
58  
59  
60
64. Rosenberg MS, Seavey BK, Jules R, Kershaw TS. The Role of a Microfinance Program on HIV Risk Behavior Among Haitian Women. *AIDS Behav* 2011;15(5):911-8.
65. Evans J, Couture M-C, Stein ES, Sansothy N, Maher L, Page K, et al. Biomarker validation of recent unprotected sexual intercourse in a prospective study of young women engaged in sex work in Phnom Penh, Cambodia. *STD* in press.
66. Kab V, Evans J, Sansothy N, Stein E, Couture M-C, Maher L, et al. Testing for amphetamine-type stimulant (ATS) use to ascertain validity of self-reported ATS use among young female sex workers in Cambodia. . *Addiction Science & Clinical Practice* 2012;7:11-25.
67. Tucker JD, Tuminez AS. Reframing the interpretation of sex worker health: a behavioral-structural approach. *J Infect Dis* 2011;204 Suppl 5:S1206-10.

**Table 1: Selected socio-demographic characteristics, occupational, and risk exposures in two cohorts of high risk young women in Phnom Penh, Cambodia: YWHS-1 (2006-2007) and YWHS-2 (2009-2010)**

| Characteristic                                               | YWHS-1<br>N=160                 |      | YWHS-2<br>N=153*                |      | p-value |
|--------------------------------------------------------------|---------------------------------|------|---------------------------------|------|---------|
|                                                              | Prevalence of<br>characteristic |      | Prevalence of<br>characteristic |      |         |
|                                                              | N                               | %    | N                               | %    |         |
| <b>Age (years, median (IQR))</b>                             | 25 (21 – 27)                    |      | 25 ( 22 – 28)                   |      | 0.56    |
| 16-18                                                        | 13                              | 8.1  | 11                              | 7.2  | 0.86    |
| 19-24                                                        | 64                              | 40.0 | 58                              | 37.9 |         |
| 25-29                                                        | 83                              | 51.8 | 84                              | 54.9 |         |
| <b>Marital status</b>                                        |                                 |      |                                 |      |         |
| Never married                                                | 57                              | 35.6 | 38                              | 24.8 | <0.01   |
| Married-living together                                      | 24                              | 15.0 | 48                              | 31.4 |         |
| Widowed/Divorced/Separated                                   | 79                              | 49.4 | 67                              | 43.8 |         |
| <b>Education (years)</b>                                     |                                 |      |                                 |      |         |
| None                                                         | 64                              | 40.0 | 23                              | 15.0 | <0.01   |
| Primary (1-6 years)                                          | 82                              | 51.3 | 91                              | 59.5 |         |
| Secondary (7+ years)                                         | 14                              | 8.8  | 39                              | 25.5 |         |
| <b>Age at first sex (median (IQR))</b>                       | 17 (16 – 18)                    |      | 18 ( 16 – 19)                   |      | 0.03    |
| ≤ 15                                                         | 32                              | 20.1 | 22                              | 14.5 | 0.19    |
| > 15                                                         | 127                             | 79.9 | 130                             | 85.5 |         |
| <b>Length of employment as FSW<br/>(years, median (IQR))</b> | 4.3 (2.5 – 6.3)                 |      | 3 (1.7 – 5)                     |      | <0.01   |
| <b>Current employment venue (last 30<br/>days)</b>           |                                 |      |                                 |      |         |
| Entertainment                                                | 51                              | 31.9 | 113                             | 74.3 | <0.01†  |
| Brothel                                                      | 23                              | 9.2  | 3                               | 2.0  |         |
| Freelance                                                    | 59                              | 39.3 | 29                              | 19.1 |         |
| Other/Multiple                                               | 27                              | 16.9 | 7                               | 4.6  |         |
| <b>Have a manager, boss or supervisor</b>                    |                                 |      |                                 |      |         |
| No                                                           | 82                              | 53.6 | 28                              | 14.4 | <0.01   |
| Yes                                                          | 71                              | 46.4 | 124                             | 81.6 |         |
| <b>Income in past month (US \$)</b>                          |                                 |      |                                 |      |         |
| Less than \$100                                              | 68                              | 42.5 | 50                              | 32.9 | 0.18    |
| 100-150\$                                                    | 35                              | 21.9 | 43                              | 29.3 |         |

|                                                            |              |      |             |      |       |
|------------------------------------------------------------|--------------|------|-------------|------|-------|
| Over 150\$                                                 | 57           | 35.6 | 59          | 38.8 |       |
| <b>Number of sex partners in last month (median (IQR))</b> | 30 (10 – 90) |      | 5 (3 – 13)  |      | <0.01 |
| ≤10                                                        | 45           | 28.1 | 112         | 73.2 | <0.01 |
| 11 – 50                                                    | 53           | 33.1 | 41          | 26.8 |       |
| > 50                                                       | 62           | 38.8 | 0           | 0    |       |
| <b>Condom use with last paying partner</b>                 |              |      |             |      |       |
| Consistent (always)                                        | 108          | 85.7 | 86          | 87.8 | 0.66  |
| Inconsistent                                               | 18           | 14.3 | 12          | 12.2 |       |
| <b>Condom use with last non paying partner</b>             |              |      |             |      |       |
| Consistent (always)                                        | 7            | 20.6 | 10          | 18.2 | 0.78  |
| Inconsistent                                               | 27           | 79.4 | 45          | 81.8 |       |
| <b>Number of days drink alcohol (last month)</b>           | 15 (2 – 30)  |      | 18 (5 – 28) |      | 0.76  |
| 0 – 4                                                      | 65           | 40.6 | 36          | 23.5 | <0.01 |
| 5 – 19                                                     | 25           | 15.6 | 42          | 27.5 |       |
| ≥ 20                                                       | 70           | 43.7 | 75          | 49.0 |       |
| <b>Number of days drunk (last month)</b>                   | 5 (1 – 20)   |      | 3 (1 – 10)  |      | 0.07  |
| 0 – 4                                                      | 89           | 55.6 | 86          | 56.2 | <0.01 |
| 5 – 19                                                     | 33           | 20.6 | 50          | 32.7 |       |
| ≥ 20                                                       | 38           | 23.7 | 17          | 11.1 |       |
| <b>ATS use (ever)</b>                                      |              |      |             |      |       |
| No                                                         | 92           | 57.5 | 107         | 69.9 | 0.02  |
| Yes                                                        | 68           | 42.5 | 46          | 30.1 |       |
| <b>ATS use (last 3 months)</b>                             |              |      |             |      |       |
| No                                                         | 116          | 73.4 | 117         | 76.5 | 0.54  |
| Yes                                                        | 42           | 26.6 | 36          | 23.5 |       |
| <b>Ever used any drug prior to/during sex</b>              |              |      |             |      |       |
| No                                                         | 109          | 68.1 | 117         | 76.5 | 0.10  |
| Yes                                                        | 51           | 31.9 | 36          | 23.5 |       |

\* Excludes women who participated in YWHS-1

†Fisher Exact p-value

1  
2  
3  
4  
5  
6  
7  
8  
9  
10  
11  
12  
13  
14  
15  
16  
17  
18  
19  
20  
21  
22  
23  
24  
25  
26  
27  
28  
29  
30  
31  
32  
33  
34  
35  
36  
37  
38  
39  
40  
41  
42  
43  
44  
45  
46  
47  
48  
49  
50  
51  
52  
53  
54  
55  
56  
57  
58  
59  
60

**Table 2: HIV prevalence overall and by current work venue in two cohorts of young high risk women in Phnom Penh, Cambodia: YWHS-1 (2006-2007) and YWHS-2 (2009-2010)**

| Characteristic                                | YWHS-1<br>N=160 |                    | YWHS-2*<br>N=153* |                    | p-value |
|-----------------------------------------------|-----------------|--------------------|-------------------|--------------------|---------|
|                                               | N               | % (95% CI)         | N                 | %                  |         |
| <b>HIV positive</b>                           | 37              | 23.1 (16.5 – 29.7) | 14                | 9.2 (4.5 – 13.8)   | <0.01   |
| <b>HIV positive by employment venue (n/N)</b> |                 |                    |                   |                    |         |
| Entertainment                                 | 5/51            | 9.8 (1.5 – 18.1)   | 5/113             | 4.4 (0.6 – 8.2)    | <0.01   |
| Brothel                                       | 4/23            | 17.4 (1.5 – 33.3)  | 0/3               | 0                  |         |
| Freelance                                     | 22/59           | 37.3 (25.0 – 48.0) | 9/29              | 31.0 (13.8 – 48.2) |         |
| Other/Multiple                                | 6/27            | 22.2 (6.2 – 38.3)  | 0/7               | 0                  |         |

\* Excludes women who participated in YWHS-1



**Table 3: HIV testing history and behaviors in two cohorts of young high risk women in Phnom Penh, Cambodia: YWHS-1 (2006-2007) and YWHS-2 (2009-2010)**

| Characteristic                            | YWHS-1<br>N=160 |      | YWHS-2*<br>N=153* |      | p-value |
|-------------------------------------------|-----------------|------|-------------------|------|---------|
|                                           | N               | %    | N                 | %    |         |
| <b>Ever tested for HIV</b>                |                 |      |                   |      |         |
| No                                        | 58              | 36.5 | 31                | 20.3 | <0.01   |
| Yes                                       | 101             | 63.5 | 122               | 79.7 |         |
| <b>HIV test in last 3 months</b>          |                 |      |                   |      |         |
| No                                        | 126             | 79.3 | 119               | 77.8 | 0.75    |
| Yes                                       | 33              | 20.7 | 34                | 22.2 |         |
| <b>What was result of last HIV test?#</b> |                 |      |                   |      |         |
| Negative                                  | 84              | 84.0 | 114               | 93.4 | 0.04    |
| Positive                                  | 4               | 4.0  | 4                 | 3.3  |         |
| Don't know                                | 12              | 12.0 | 4                 | 3.3  |         |
| <b>Where received last HIV test#</b>      |                 |      |                   |      |         |
| Public hospital                           | 35              | 34.7 | 55                | 34.0 | 0.10    |
| Voluntary testing and counseling center   | 1               | 1.0  | 0                 | 0    |         |
| NGO clinic                                | 59              | 58.4 | 54                | 44.3 |         |
| Private hospital, clinic, or laboratory   | 6               | 5.9  | 13                | 10.7 |         |

\* Excludes women who participated in YWHS-1

# Among those who reported being previously tested for HIV



## Figure Legend

Figure 1: Venues where women in YWHS-2 and YWHS-2 reported ever working

Figure 2. Alcohol use in the past month and ATS use in the past 3 months reported by women in YWHS-1 and YWHS-2 by work venue: (A) Entertainment-based; (B) Brothel-based; (C) Freelance

For peer review only

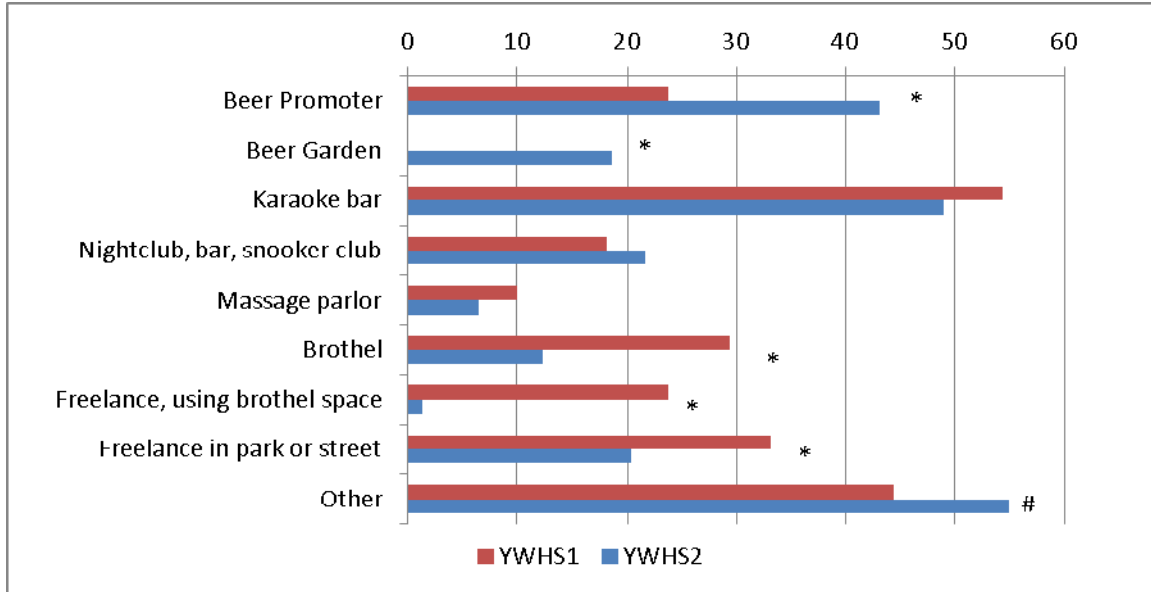

\* p≤0.05; # p=0.06

Peer review only

1  
2  
3  
4  
5  
6  
7  
8  
9  
10  
11  
12  
13  
14  
15  
16  
17  
18  
19  
20  
21  
22  
23  
24  
25  
26  
27  
28  
29  
30  
31  
32  
33  
34  
35  
36  
37  
38  
39  
40  
41  
42  
43  
44  
45  
46  
47  
48  
49  
50  
51  
52  
53  
54  
55  
56  
57  
58  
59  
60

1  
2  
3  
4  
5  
6  
7  
8  
9  
10  
11  
12  
13  
14  
15  
16  
17  
18  
19  
20  
21  
22  
23  
24  
25  
26  
27  
28  
29  
30  
31  
32  
33  
34  
35  
36  
37  
38  
39  
40  
41  
42  
43  
44  
45  
46  
47  
48  
49  
50  
51  
52  
53  
54  
55  
56  
57  
58  
59  
60

For peer review only



\*p<0.05

STROBE Statement—Checklist of items that should be included in reports of *cohort studies*

**Page et al., Sex work and HIV in Cambodia: trajectories of risk and disease in two cohorts of high risk young women in Phnom Penh, Cambodia**

|                              | Item No | Item, Section and PAGE NUMBER                                                                                                                                                                                                                                                                                                                                                                                                                                                                                                               |
|------------------------------|---------|---------------------------------------------------------------------------------------------------------------------------------------------------------------------------------------------------------------------------------------------------------------------------------------------------------------------------------------------------------------------------------------------------------------------------------------------------------------------------------------------------------------------------------------------|
| <b>Title and abstract</b>    | 1       | (a) Study's design with a commonly used terms – PAGE 1<br>(b) Provide in the abstract an informative and balanced summary of what was done and what was found – PAGE 3                                                                                                                                                                                                                                                                                                                                                                      |
| <b>Introduction</b>          |         |                                                                                                                                                                                                                                                                                                                                                                                                                                                                                                                                             |
| Background/rationale         | 2       | Scientific background and rationale for the investigation being reported – PAGE 7-9                                                                                                                                                                                                                                                                                                                                                                                                                                                         |
| Objectives                   | 3       | State specific objectives, including any prespecified hypotheses- PAGE 9                                                                                                                                                                                                                                                                                                                                                                                                                                                                    |
| <b>Methods</b>               |         |                                                                                                                                                                                                                                                                                                                                                                                                                                                                                                                                             |
| Study design                 | 4       | Present key elements of study design early in the paper- PAGE 9                                                                                                                                                                                                                                                                                                                                                                                                                                                                             |
| Setting                      | 5       | Describe the setting, locations, and relevant dates, including periods of recruitment, exposure, follow-up, and data collection- PAGE 9, 11                                                                                                                                                                                                                                                                                                                                                                                                 |
| Participants                 | 6       | (a) Give the eligibility criteria, and the sources and methods of selection of participants. Describe methods of follow-up- PAGE 10<br>(b) For matched studies, give matching criteria and number of exposed and unexposed                                                                                                                                                                                                                                                                                                                  |
| Variables                    | 7       | Clearly define all outcomes, exposures, predictors, - PAGE 10-12                                                                                                                                                                                                                                                                                                                                                                                                                                                                            |
| Data sources/<br>measurement | 8*      | For each variable of interest, give sources of data and details of methods of assessment (measurement). Describe comparability of assessment methods if there is more than one group – PAGE 10-12                                                                                                                                                                                                                                                                                                                                           |
| Bias                         | 9       | Describe any efforts to address potential sources of bias – NA (CROSS-SECTIONAL BASELINE DATA ONLY ARE INCLUDED IN THIS ANALYSIS)                                                                                                                                                                                                                                                                                                                                                                                                           |
| Study size                   | 10      | Explain how the study size was arrived at – PAGE 10                                                                                                                                                                                                                                                                                                                                                                                                                                                                                         |
| Quantitative variables       | 11      | Explain how quantitative variables were handled in the analyses. If applicable, describe which groupings were chosen and why- PAGE 12                                                                                                                                                                                                                                                                                                                                                                                                       |
| Statistical methods          | 12      | (a) Describe all statistical methods, including those used to control for confounding- PAGE 12<br>(b) Describe any methods used to examine subgroups and interactions- PAGE 12<br>(c) Explain how missing data were addressed- NA (BASELINE DATA ONLY ARE INCLUDED IN THIS ANALYSIS)<br>(d) If applicable, explain how loss to follow-up was addressed NA (CROSS-SECTIONAL BASELINE DATA ONLY ARE INCLUDED IN THIS ANALYSIS)<br>(e) Describe any sensitivity analyses NA (CROSS-SECTIONAL BASELINE DATA ONLY ARE INCLUDED IN THIS ANALYSIS) |
| <b>Results</b>               |         |                                                                                                                                                                                                                                                                                                                                                                                                                                                                                                                                             |
| Participants                 | 13*     | (a) Report numbers of individuals at each stage of study—eg numbers potentially eligible, examined for eligibility, confirmed eligible, included in the study, completing follow-up, and analysed- PAGE 12, 13<br>(b) Give reasons for non-participation at each stage NA (CROSS-SECTIONAL BASELINE DATA ONLY ARE INCLUDED IN THIS ANALYSIS)<br>(c) Consider use of a flow diagram NA                                                                                                                                                       |
| Descriptive data             | 14*     | (a) Give characteristics of study participants (eg demographic, clinical, social) and information on exposures and potential confounders- PAGE 12, 13, and TABLE 1                                                                                                                                                                                                                                                                                                                                                                          |

|                          |     |                                                                                                                                                                                                                                                                                                                                                                                                                                     |
|--------------------------|-----|-------------------------------------------------------------------------------------------------------------------------------------------------------------------------------------------------------------------------------------------------------------------------------------------------------------------------------------------------------------------------------------------------------------------------------------|
|                          |     | (b) Indicate number of participants with missing data for each variable of interest<br>NA                                                                                                                                                                                                                                                                                                                                           |
|                          |     | (c) Summarise follow-up time (eg, average and total amount) NA (CROSS-SECTIONAL BASELINE DATA ONLY ARE INCLUDED IN THIS ANALYSIS)                                                                                                                                                                                                                                                                                                   |
| Outcome data             | 15* | Report numbers of outcome events or summary measures over time – TABLE 1 AND 2                                                                                                                                                                                                                                                                                                                                                      |
| Main results             | 16  | (a) Give unadjusted estimates and, if applicable, confounder-adjusted estimates and their precision (eg, 95% confidence interval). Make clear which confounders were adjusted for and why they were included. TABLES 1 AND 2<br>(b) Report category boundaries when continuous variables were categorized NA<br>(c) If relevant, consider translating estimates of relative risk into absolute risk for a meaningful time period NA |
| Other analyses           | 17  | Report other analyses done—eg analyses of subgroups and interactions, and sensitivity analyses –PAGE 13                                                                                                                                                                                                                                                                                                                             |
| <b>Discussion</b>        |     |                                                                                                                                                                                                                                                                                                                                                                                                                                     |
| Key results              | 18  | Summarise key results with reference to study objectives – PAGE 14, 15                                                                                                                                                                                                                                                                                                                                                              |
| Limitations              | 19  | Discuss limitations of the study, taking into account sources of potential bias or imprecision. Discuss both direction and magnitude of any potential bias – PAGE 18                                                                                                                                                                                                                                                                |
| Interpretation           | 20  | Give a cautious overall interpretation of results considering objectives, limitations, multiplicity of analyses, results from similar studies, and other relevant evidence PAGE 14-15                                                                                                                                                                                                                                               |
| Generalisability         | 21  | Discuss the generalisability (external validity) of the study results PAGE 18                                                                                                                                                                                                                                                                                                                                                       |
| <b>Other information</b> |     |                                                                                                                                                                                                                                                                                                                                                                                                                                     |
| Funding                  | 22  | Give the source of funding and the role of the funders for the present study and, if applicable, for the original study on which the present article is based PAGE 5                                                                                                                                                                                                                                                                |

\*Give information separately for exposed and unexposed groups.

**Note:** An Explanation and Elaboration article discusses each checklist item and gives methodological background and published examples of transparent reporting. The STROBE checklist is best used in conjunction with this article (freely available on the Web sites of PLoS Medicine at <http://www.plosmedicine.org/>, Annals of Internal Medicine at <http://www.annals.org/>, and Epidemiology at <http://www.epidem.com/>). Information on the STROBE Initiative is available at <http://www.strobe-statement.org>.



**Sex work and HIV in Cambodia: trajectories of risk and disease in two cohorts of high risk young women in Phnom Penh, Cambodia**

|                                 |                                                                                                                                                                                                                                                                                                                                                                                                                                                                                                                                                                                                                                                                       |
|---------------------------------|-----------------------------------------------------------------------------------------------------------------------------------------------------------------------------------------------------------------------------------------------------------------------------------------------------------------------------------------------------------------------------------------------------------------------------------------------------------------------------------------------------------------------------------------------------------------------------------------------------------------------------------------------------------------------|
| Journal:                        | <i>BMJ Open</i>                                                                                                                                                                                                                                                                                                                                                                                                                                                                                                                                                                                                                                                       |
| Manuscript ID:                  | bmjopen-2013-003095.R2                                                                                                                                                                                                                                                                                                                                                                                                                                                                                                                                                                                                                                                |
| Article Type:                   | Research                                                                                                                                                                                                                                                                                                                                                                                                                                                                                                                                                                                                                                                              |
| Date Submitted by the Author:   | 08-Aug-2013                                                                                                                                                                                                                                                                                                                                                                                                                                                                                                                                                                                                                                                           |
| Complete List of Authors:       | Page, Kimberly; University of California San Francisco, Epidemiology and Biostatistics<br>Stein, Ellen; UCSF, Epidemiology & Biostatistics<br>Sansothy, Neth; NCHADS,<br>Evans, Jennifer; UCSF, Epidemiology & Biostatistics<br>Couture, Marie-Claude; UCSF, Epidemiology & Biostatistics<br>Sichan, Keo; Cambodia Women's Development Assoc.,<br>Cockroft, Melissa; Cambodia Women's Development Assoc.,<br>Mooney-Somers, Julie; University of Sydney, Center for Values, Ethics and the Law in Medicine<br>Phlong, Pisith; Royal University of Fine Arts,<br>Kaldor, John; University of New South Wales, The Kirby Institute<br>Maher, Lisa; The Kirby Institute, |
| <b>Primary Subject Heading</b>: | HIV/AIDS                                                                                                                                                                                                                                                                                                                                                                                                                                                                                                                                                                                                                                                              |
| Secondary Subject Heading:      | Epidemiology, Global health, HIV/AIDS, Public health                                                                                                                                                                                                                                                                                                                                                                                                                                                                                                                                                                                                                  |
| Keywords:                       | EPIDEMIOLOGY, HIV & AIDS < INFECTIOUS DISEASES, Public health < INFECTIOUS DISEASES                                                                                                                                                                                                                                                                                                                                                                                                                                                                                                                                                                                   |
|                                 |                                                                                                                                                                                                                                                                                                                                                                                                                                                                                                                                                                                                                                                                       |

SCHOLARONE™  
Manuscripts

1 Sex work and HIV in Cambodia: trajectories of risk and disease in two cohorts of high  
2 risk young women in Phnom Penh, Cambodia  
3  
4  
5  
6  
7  
8  
9

10 Kimberly Page, Ph.D.<sup>1</sup>, Ellen Stein, MPH<sup>1</sup>, Neth Sansothy, M.D.<sup>2</sup>, Jennifer Evans, M.S.<sup>1</sup>,  
11 Marie-Claude Couture, Ph.D.<sup>1</sup>, Keo Sichan<sup>3</sup>, Melissa Cockroft, BA<sup>3\*</sup>, Julie Mooney-  
12 Somers, Ph.D.<sup>4, 5</sup>, Pisith Phlong, M.A.<sup>6</sup>, John Kaldor, Ph.D.<sup>4</sup>, Lisa Maher Ph.D.<sup>4</sup>,  
13  
14  
15  
16  
17  
18  
19  
20  
21

22 Collaborators: (on behalf of the Young Women's Health Study Collaborative: John  
23 Kaldor, Ph.D.<sup>4</sup>, Serey Phal Kien<sup>3</sup>, Kimberly Page, Ph.D.<sup>1</sup>, Joel M. Palefsky M.D.<sup>7</sup>,  
24 Vonthanak Saphonn, M.D.<sup>2</sup>, Mean Chhi Vun, M.D.<sup>2</sup>).  
25  
26  
27  
28  
29  
30  
31  
32

- 33 1. University of California San Francisco, Department of Epidemiology and Biostatistics;  
34 San Francisco, and Global Health Sciences, 50 Beale St., 12<sup>th</sup> Floor, San Francisco, CA,  
35 94105; USA
- 36 2. National Center for HIV/AIDS, Dermatology and STDs (NCHADS), #245H, Street 6A,  
37 Phum Kean Khlang, Sangkat Prekleap Russey Keo, Phnom Penh, Cambodia
- 38 3. Cambodian Women's Development Association (CWDA); No. 19, Street 242, Boeung  
39 Prolit, Khan 7 Makara, Phnom Penh, Cambodia
- 40 4. The Kirby Institute (formerly the National Centre in HIV Epidemiology and Clinical  
41 Research); University of New South Wales, CFI building, corner of West and Boundary  
42 Streets, Darlinghurst, NSW 2010, Australia
- 43 5. The Centre for Values, Ethics and the Law in Medicine, The University of Sydney  
44 Level 1 of the Medical Foundation Building, 92-94 Parramatta Road, Camperdown, NSW,  
45  
46  
47  
48  
49  
50  
51  
52  
53  
54  
55  
56  
57  
58  
59  
60



1 Australia

2  
3 6. Royal University of Fine Arts, 72 Street 19, Phnom Penh, Cambodia.

4  
5  
6 7. University of California San Francisco, Department of Medicine; 513 Parnassus Ave,  
7  
8 Med Sci S-420; UCSF, San Francisco, San Francisco, CA. 94143 - 0654  
9

10  
11  
12 \*Melissa Cockroft is currently at Marie Stopes International in Phnom Pehn, Cambodia  
13

14  
15  
16  
17 Address correspondence to:

18  
19 Kimberly Page, Ph.D., MPH, Dept. of Epidemiology and Biostatistics, Global Health  
20  
21 Sciences, University of California San Francisco, CA 94105; 50 Beale St., 12<sup>th</sup> Floor, San  
22  
23 Francisco, CA USA, 94105. [kpage@psg.ucsf.edu](mailto:kpage@psg.ucsf.edu)  
24  
25

26  
27  
28  
29 Word count: Abstract: 296; Text 3444; 3 Tables, 2 Figures.  
30

31  
32  
33 Key words: Cambodia, female sex workers, HIV, STI, risk, amphetamine-type  
34  
35 stimulant, alcohol, policy effects  
36  
37

38  
39  
40 Short title: HIV infection and risk in two samples of FSW in Phnom Penh, Cambodia  
41  
42  
43  
44  
45  
46  
47  
48  
49  
50  
51  
52  
53  
54  
55  
56  
57  
58  
59  
60

## Abstract

**Objectives:** HIV prevalence among Cambodian female sex workers (FSW) is among the highest in Southeast Asia. We describe HIV prevalence and associated risk exposures in FSW sampled serially in Phnom Penh, Cambodia (Young Women's Health Study (YWHS), before and after the implementation of a new law designed to combat human trafficking and sexual exploitation.

**Design:** Cross-sectional analysis of baseline data from two prospective cohorts.

**Setting:** Community-based study in Phnom Penh, Cambodia.

**Participants:** Women aged 15-29 years, reporting  $\geq 2$  sexual partners in the last month and/or engaged in transactional sex in the last 3 months, were enrolled in the studies in 2007 (N=161; YWHS-1), and 2009 (N=220; YWHS-2) following information sessions where 285 and 345 women attended.

**Primary outcomes:** HIV prevalence, sexual risk behaviour, amphetamine-type stimulant (ATS) and alcohol use, and work-related factors were compared the two groups, enrolled before and after implementation of the new law.

**Results:** Participants and in the two cohorts were similar in age (median 25 years), but YWHS-2 women reported fewer sex partners, more alcohol use, and less ATS use. A higher proportion of YWHS-2 compared to YWHS-1 women worked in entertainment-based venues (68% vs. 31%, respectively). HIV prevalence was significantly lower in the more recently sampled women: 9.2% (95% CI 4.5, 13.8) vs. 23% (95% CI 16.5, 29.7).

**Conclusions:** Sex work context and risk has shifted among young FSW in Phnom Penh, following implementation of anti-prostitution and anti-trafficking laws. While both cohorts were recruited using the same eligibility criteria, more recently sampled women had lower prevalence of sexual risk and HIV infection. Women engaged more directly in transactional sex have become harder to sample and access. Future prevention

1 research and programs need to consider how new policies and demographic changes in  
2  
3  
4 FSW impact HIV transmission.  
5  
6  
7  
8  
9  
10  
11  
12  
13  
14  
15  
16  
17  
18  
19  
20  
21  
22  
23  
24  
25  
26  
27  
28  
29  
30  
31  
32  
33  
34  
35  
36  
37  
38  
39  
40  
41  
42  
43  
44  
45  
46  
47  
48  
49  
50  
51  
52  
53  
54  
55  
56  
57  
58  
59  
60

For peer review only

## Article summary

### Article Focus

- HIV prevalence and incidence in two serial samples of young female sex workers in Phnom Penh, Cambodia (2007-2008, and 2009-2010);
- Comparison of baseline risk and HIV outcomes, including sexual behavior, drug and alcohol use in the two cohorts sampled before and after implementation of anti-trafficking and sexual exploitation laws in 2008;
- Impact of anti-trafficking and sexual exploitation legislation on female sex workers and HIV risk.

### Key Messages

- Women sampled using the same eligibility criteria and outreach methods in differed with respect to risk exposures and HIV outcomes;
- Changes in sex work typology and environment are evident after enactment of the anti-trafficking laws, including very few brothel-based FSW and significantly more FSW based in the entertainment sector;
- Shifts in the context of sex work and risk highlight the ongoing need and challenges for HIV and drug prevention for young women engaged in sex work.

### Strengths and Limitations

- Two comparably sampled groups of young FSW suggest changing trends in HIV risk;
- Comparison of cross-sectional samples is ecological and does not prove temporal effects;
- Criminalization and suppression of sex work and a flourishing entertainment-based sex work industry set new and conflicting stage for HIV prevention.

1 Author Contributions: All authors contributed to the design and implementation of the  
2  
3 YWHS-1 and -2 studies. Authors KP, ES, JE, and LM compiled the first draft of the  
4  
5 manuscript, which was reviewed by NS, M-CC, KS, MC, JM\_S, PP, JK. The primary  
6  
7 statistical analysis was conducted by JE and M-CC; KS and MC provided supplemental  
8  
9 data review, and KP reviewed all data analyses. All authors contributed to and have  
10  
11 approved the final manuscript. The YWHS Collaborative is a steering committee who  
12  
13 reviewed and approved the study protocols, and provided expertise into some or all of  
14  
15 the studies' methods and implementation.  
16  
17  
18  
19  
20  
21

22 Data Sharing: no additional data available.  
23  
24  
25  
26

27 Funding sources and conflicts of interest: The Young Women's Health Study-1 and  
28  
29 YWHS-2 were supported by Awards 1R21DA025441 from the National Institute on Drug  
30  
31 Abuse, and R01NR010995 from the National Institute of Nursing Research. M-C Couture  
32  
33 was also supported by the Canadian Institutes of Health Research (postdoctoral  
34  
35 fellowship award). Professors Lisa Maher and John Kaldor are supported by Australian  
36  
37 National Health and Medical Research Council (NHMRC) Research Fellowship. The Kirby  
38  
39 Institute is affiliated with the Faculty of Medicine, University of New South Wales and is  
40  
41 funded by the Australian Government Department of Health and Ageing. The content is  
42  
43 solely the responsibility of the authors and does not necessarily represent the official  
44  
45 views of the National Institutes of Health, nor the Australian Government. The authors  
46  
47 have no conflicts to disclose.  
48  
49  
50  
51  
52  
53

54 Acknowledgments: The authors would like to acknowledge the coordinated efforts and  
55  
56 dedication of the research teams at the National Center for HIV/AIDS, Dermatology,  
57  
58 and STDs and the Cambodian Women's Development Agency. We are indebted to all the  
59  
60

1  
2  
3  
4  
5  
6  
7  
8  
9  
10  
11  
12  
13  
14  
15  
16  
17  
18  
19  
20  
21  
22  
23  
24  
25  
26  
27  
28  
29  
30  
31  
32  
33  
34  
35  
36  
37  
38  
39  
40  
41  
42  
43  
44  
45  
46  
47  
48  
49  
50  
51  
52  
53  
54  
55  
56  
57  
58  
59  
60

Cambodian women who agreed to participate in this study and grateful for the privilege to work with them.

For peer review only

## Introduction

There have been significant declines in HIV prevalence in Cambodia since the epidemic peaked in around 2000, a success widely attributed to measurable increases in condom use, declines in the number and frequency of commercial sex transactions reported by men, access to HIV voluntary counseling & testing (VCT) and uptake of antiretroviral therapy.<sup>1-3</sup> In 2010, the National Center for HIV/AIDS, Dermatology and STDs (NCHADS) revised the national estimate of HIV prevalence to 0.8% (in 15-49 year olds), reflecting a significant decline after the peak estimate of 2.4% in 1998.<sup>4</sup> However, HIV prevalence in Cambodian women, especially young women, is among the highest in Southeast Asia and heterosexual sex remains the main route of transmission.<sup>5-9</sup> Since 2006, women have accounted for over half (52%) of all HIV infections in Cambodia<sup>10</sup>, higher than in Asia and the Pacific in general (35%).<sup>11</sup> Limited income generating activities, a highly mobile workforce, trafficking in women and girls and widespread transactional sex, poverty, and sexually transmitted infections (STI) have been identified as key drivers of the epidemic among female sex workers (FSW).<sup>1 5 6 10 12-15</sup> As in many countries, FSW in Cambodia can be hard to reach and difficult to provide prevention services to. In recent years significant economic and policy changes have affected the sex work landscape, with notable shifts in sex work venues, typologies, and more women engaged in transactional sex than ever before.<sup>16-20</sup>

Until 2008, FSW in Cambodia were categorized as "direct" and were mostly brothel-based, or "indirect". Indirect FSW were distinguished from direct FSW, generally working in entertainment establishments as beer promotion girls, waitresses, hostesses, or karaoke girls for example, and engaged in occasional transactional sex for supplementary income.<sup>21-23</sup> In 1997, an estimated 5,300 women worked in the entertainment/service sector and 6,000 were brothel-based FSW. The number of

1 women involved in entertainment-based sex work has grown dramatically in recent  
2 years in Cambodia. Until 2008, the estimated number of women engaged in sex and  
3 entertainment work was stable (12,762 women were enumerated in 2008), however by  
4 2012, this had increased dramatically to an estimated 41,622 women, a more than  
5 threefold increase from the 2008 estimate (NCHADS, personal communication). The  
6 reasons for this growth have not been explored in detail, but may be associated with  
7 changing economic factors during this time in Cambodia. Following the passage and  
8 implementation of the "Law on Suppression of Human Trafficking and Sexual  
9 Exploitation" in February, 2008, brothel-based sex work was banned, and the most  
10 direct effect was on direct sex trade, which went "underground", or women moved into  
11 indirect work.<sup>10</sup> Along with the overt enforcement against FSW, the 2008 anti-  
12 trafficking legislation had other consequences. For instance, official terminology used by  
13 governmental and non-governmental organizations (NGO) to describe FSW labeled all  
14 women engaged in sex and entertainment work as "entertainment workers", or EW\*.  
15 Historically, brothel-based FSW were easily accessed and monitored for HIV prevention  
16 efforts, including HIV and behavioral surveillance. NGOs working in HIV prevention  
17 reported that as transactional sex was displaced to a wider range of settings, women at  
18 highest risk became harder to reach for both prevention and service delivery.<sup>16 24 25</sup>  
19 These factors pose significant challenges to HIV prevention and threaten to undermine  
20 progress achieved to date.

---

21  
22  
23  
24  
25  
26  
27  
28  
29  
30  
31  
32  
33  
34  
35  
36  
37  
38  
39  
40  
41  
42  
43  
44  
45  
46  
47  
48  
49  
50  
51  
52  
53  
54  
55  
56  
57  
58  
59  
60

\* The term 'female sex worker' is no longer used in Cambodia. Terminology was changed in 2008 to designate high risk women working in service and entertainment venues as "entertainment workers" or EW. No new HIV surveillance data has been published on FSW, and Behavioral Surveillance Survey (BSS) methods have been changed to recognize only indirect sex workers- 'EW', and determining whether or not they are selling sex by the average number of reported sex partners per week (10. UNAIDS. Cambodia Country Progress Report: Monitoring the Progress towards the Implementation of the Declaration of Commitment on HIV and AIDS. Reporting period: January 2010-December 2011. Prepared by National AIDS Authority for United Nations General Assembly Special Session (UNGASS). . <http://www.unaids.org/en/regionscountries/countries/cambodia/> Accessed December 28, 2012..



1 HIV prevalence is extremely high among Cambodian FSW with prevalence among  
2 younger women is particularly troubling as their infection is likely to be more recent and  
3 indicative of incidence.<sup>5 8 9 21</sup> A cornerstone of HIV prevention in Cambodia was the  
4 100% Condom Use campaign<sup>26 27</sup>, primarily directed at brothel-based FSW. With  
5 changes in sex work venues, this prevention approach is likely less effective, failing to  
6 reach the large number of women now engaged in transactional sex in entertainment  
7 establishments. Indeed, measures of self-reported condom use have declined according  
8 to monitoring data reported by UNAIDS.<sup>10</sup> New risk factors have also emerged,  
9 especially amphetamine-type stimulant (ATS) use, in the form of “yama”, (pills) and  
10 “ice” (a crystalline form).<sup>28-38</sup> ATS use is associated with increased sexual risk behavior  
11 and STI incidence among these young women<sup>5 39</sup>, similar to that seen in other  
12 populations and locales.<sup>40-44</sup>

13 We conducted two prospective studies of high-risk young women engaged in  
14 transactional sex in Phnom Penh, the principal research questions focused on estimating  
15 HIV and STI prevalence and incidence and associated risk factors. The first, Young  
16 Women’s Health Study (YWHS-1), was conducted in 2007-2008 and the second, YWHS-  
17 2, in 2009-2010.<sup>5 16 39 45 46</sup> In this paper, we explore the changing HIV risk landscape by  
18 comparing and contrasting the two cohorts of FSW sampled prior to, and following,  
19 legislative changes designed to combat human trafficking and sexual exploitation in  
20 Cambodia. We theorize that the demographic characteristics and HIV risk of FSW has  
21 shifted as a result of socio-legal changes induced by the implementation of the new  
22 legislation.

## 23 **Methods**

### 24 ***Study setting***

1 The YWHS-1 and YWHS-2 were both prospective studies of young women engaged in  
2 sex work in Phnom Penh, Cambodia. Methods have been described in detail previously.<sup>5</sup>  
3  
4  
5  
6 <sup>39</sup> Both studies were led by a multidisciplinary collaborative prevention research group  
7  
8 from NCHADS, the Cambodian Women's Development Association (CWDA), the  
9  
10 University of California in San Francisco (UCSF) in the United States, and the Kirby  
11  
12 Institute at the University of New South Wales (UNSW) in Australia.  
13  
14

### 15 16 17 **Study population and recruitment**

18  
19 The target population in both studies was young women engaged in transactional sex in  
20 Phnom Penh. Inclusion criteria were: aged 15-29 years, Khmer language  
21  
22 comprehension,  $\geq 2$  different sexual partners in the last month *or* engaged in  
23  
24 transactional sex (sex in exchange for money, goods, services, or drugs) within the last  
25  
26 three months, no plans to move in the next 12 months, biologically female, and able to  
27  
28 provide voluntary informed consent. YWHS-1 aimed to sample 160 women to provide  
29  
30 80% power to estimate a point prevalence of HIV at 15% with a 95% confidence  
31  
32 interval (CI) of 9.7% to 23.0%. Based on results of YWHS-1, YWHS-2 aimed to sample  
33  
34 220 women to detect an estimated HIV prevalence of 23% (95% CI, 17.3%, 30.5%).  
35  
36  
37  
38  
39  
40  
41  
42

43 Recruitment and enrollment procedures were the same in both studies.<sup>5</sup> CWDA field  
44  
45 assistants provided study information and conducted eligibility screening via information  
46  
47 meetings in neighborhoods where sex work was prevalent. Eligible women were invited  
48  
49 to a community location used by various sex-worker organizations where study  
50  
51 information was described in more detail and written informed consent was obtained.  
52  
53 Enrolled participants were given appointment cards to present to the YWHS clinic field-  
54  
55 site and free transportation was offered. In both studies, women were remunerated  
56  
57 US\$5 at each study visit for their participation time.  
58  
59  
60

### **Data collection**

All data collection occurred at the YWHS clinic, which was staffed by a physician, nurses, counselors and a laboratory technician. A structured questionnaire was administered in Khmer by trained interviewers. Survey items were similar in both studies, and covered socio-demographic characteristics, occupational and sexual risk history, alcohol and drug use. HIV testing was conducted at each visit. In YWHS-1, urine specimens were tested for *Chlamydia trachomatis* (CT) and *Neisseria gonorrhoea* (GC). In YWHS-2, women were tested for HPV infection. STI treatment was provided at no cost, and women with HIV and HPV infection were referred to a local provider for free medical evaluation and treatment.

### **Laboratory testing**

HIV serology was performed using two rapid tests; Uni-Gold Recombigen<sup>™</sup> HIV rapid HIV test (Trinity Biotech USA, Jamestown, NY) and the Clairview HIV 1/2 STAT-PAK (Inverness Medical Diagnostics, Waltham, MA). HIV positive and discordant samples were confirmed by HIV-1 immunoblot. CT and GC were assessed from urine samples using BDProbeTec<sup>™</sup> strand displacement amplification assay (Becton Dickinson, Sparks, MD) at the NCHADS STD laboratory.<sup>5</sup> Cervical specimens for HPV testing were collected using a standard cytobrush.<sup>47</sup> Client-centered risk reduction counseling was provided in association with all testing.

### **Ethical review**

The study protocols were reviewed and approved by Institutional Review Board of the Committee on Human Research at UCSF, the Cambodian National Ethics Committee, and the University of New South Wales Human Research Ethics Committee in

1 accordance with ethical standards (institutional and national) and with the Helsinki  
2 Declaration of 1975, as revised in 2000.  
3  
4  
5  
6  
7

### 8 **Measures**

9  
10 Both studies aimed to estimate HIV infection, ATS use, and sexual risk behavior and  
11 included questions on sociodemographic factors, work history, income, and duration of  
12 sex work, and whether they currently had an employer (manager, boss or supervisor).  
13 Women were asked if they had ever and/or were currently working: as a beer promoter,  
14 in a beer garden, as a waitress or hostess in a karaoke bar, nightclub or snooker bar, in  
15 a massage parlor, brothel, as a freelance sex worker using space at a brothel, as a  
16 freelance sex worker in the park or on the street, or to specify 'other' location. They  
17 were asked about age at first sex, number of partners (last month) and condom use  
18 with last partners (paying and non-paying). Paying partners were defined as male  
19 clients with whom respondents traded sex for money, goods or drugs. Condom use was  
20 classified as "consistent" if the participant reported always using a condom. Participants  
21 were asked about the number of days in which alcohol was drunk and the number of  
22 days in which they were "affected" by alcohol or were "drunk" in the past month. ATS  
23 use (ever and last 3 months) was assessed with questions regarding use of *yama* and  
24 crystal (ice).  
25  
26  
27  
28  
29  
30  
31  
32  
33  
34  
35  
36  
37  
38  
39  
40  
41  
42  
43  
44  
45  
46

### 47 **Analyses**

48  
49 Prevalence estimates were calculated using exact binomial confidence intervals (CI).  
50 Chi-square and Fisher's Exact Tests were used to examine differences in baseline socio-  
51 demographic, occupational, sexual, and alcohol/drug use exposures and prevalent HIV  
52 and STI between the two cohorts. The only longitudinal data compared was HIV  
53 incidence. The HIV incidence rate calculated using the number of seroconversions per  
54  
55  
56  
57  
58  
59  
60

1 100 person-years of observation (PYO) assuming a Poisson distribution. Analyses were  
2 performed using STATA 9.0 (STATA, College Station, TX).  
3  
4  
5  
6  
7

## 8 **Results**

9  
10 In YWHS-1, 285 women attended community information sessions, 161 (56%) eligible  
11 women were recruited to the group information/consent meeting, and 160 (99%)  
12 consented to participate. In YWHS-2, 220 (64%) women consented out of 345 who  
13 attended information sessions. Sixty-seven women from YWHS-1 also enrolled in  
14 YWHS-2; they were not included in the YWHS-2 comparison group, leaving 153 in the  
15 analysis. Table 1 shows baseline socio-demographic and occupational factors, as well as  
16 sexual and substance use risk exposures, in the two cohorts. The cohorts were similar  
17 with respect to age (median 25 years), and age of sexual debut (median 17 and 18  
18 years, respectively), but differed significantly in years of education and marital status.  
19 Compared to women in YWHS-1, women in YWHS-2 had more education (median of 5  
20 years (IQR 2,7) vs. 2 years (IQR 0,4)), and were more likely to be married or  
21 cohabitating with a partner (31.4% vs. 15%, respectively).  
22  
23  
24  
25  
26  
27  
28  
29  
30  
31  
32  
33  
34  
35  
36  
37

38 Women in YWHS-2 had been involved in sex work for significantly less time (median of  
39 3 years (IQR 1.7, 5)) than YWHS-1 women (median of 4.3 years (IQR 2.5, 6.3)). More  
40 YWHS-2 women were currently (last 30 days) working in entertainment venues and  
41 fewer in brothels, or as freelance FSW (including in parks, guest houses, or on the  
42 street). These differences were also reflected in the significantly higher proportion of  
43 YWHS-2 women who reported having a manager or boss (81.6%) compared to YWHS-1  
44 (46%). Figure 1 shows the distribution and range of work venues women reported 'ever'  
45 working in. Women in YWHS-2 also reported significantly fewer sexual partners in the  
46 past 30 days: a median of 5 compared to 30 in YWHS-1 (Table 1). Despite these  
47 differences, women in the two samples reported similar income distributions. Self-  
48  
49  
50  
51  
52  
53  
54  
55  
56  
57  
58  
59  
60

1 reported consistent condom use, with both paying and non-paying partners, did not  
2  
3 differ between cohorts. Alcohol and ATS use differed significantly: women in YWHS-2  
4  
5 reported more alcohol use, but fewer days drunk in the past month than in YWHS-1;  
6  
7 and fewer women in YWHS-2 reported ever using ATS, although recent use was similar  
8  
9 in both groups (Table 1). Both alcohol and ATS use varied by cohort and work venue:  
10  
11 entertainment-based women in YWHS-2 reported less of both, whereas brothel and  
12  
13 freelance-based women in YWHS-2 reported significantly more ATS use (Figure 2).  
14  
15  
16  
17  
18  
19

20  
21 HIV prevalence was significantly ( $p < 0.01$ ) lower in women sampled in YWHS-2  
22  
23 compared to YWHS-1: 9.2% (95% CI 4.5%, 13.8%;  $p < 0.01$ ) vs. 23% (95% CI 16.5%,  
24  
25 29.7%) (Table 2). When the 67 women who had participated in both samples were  
26  
27 included in YWHS-2, HIV prevalence was 15.5% (95% CI 10.6, 20.3). HIV incidence  
28  
29 was also lower in YWHS-2: 0.8/100 pyo (95% CI 0.1, 6.0) vs. 3.6/100 pyo (95% CI  
30  
31 1.2, 11.1), but not significantly ( $p = 0.26$ ). In YWHS-1, prevalence of Chlamydia infection  
32  
33 was 11.5% (95% CI 6.0%, 17.1%) and Gonorrhoea infection was 7.8% (95% CI 3.5%,  
34  
35 12.3%). Women in YWHS-2 were not tested for these STI, but 41.1% were HPV. HIV  
36  
37 prevalence differed significantly by work venue and by cohort, but over 30% of  
38  
39 freelance-based women tested positive in both cohorts (Table 2).  
40  
41  
42  
43

44 In both cohorts, 20% reported being tested for HIV in the past 3 months but more  
45  
46 YWHS-2 women had a history of testing (Table 3). More women in YWHS-1 reported not  
47  
48 knowing their HIV test results: 11 of the 84 women (13.1%) who reported being  
49  
50 negative tested positive and 4 of 12 women (33.3%) who reported they did not know  
51  
52 their previous HIV results tested positive. In YWHS-2, 5 of 114 (4.4%) who reported  
53  
54 testing negative, and 2 of 4 (50%) who did not know their previous results, tested  
55  
56  
57  
58  
59  
60

1 positive. Among women who reported no history of HIV testing, 31% (18/58) and  
2  
3  
4 12.9% (4/31) tested HIV positive in YWHS-1 and -2, respectively.  
5  
6  
7

## 8 9 **Discussion**

10  
11  
12 In these two samples of young FSW, recruited using the same eligibility criteria and  
13  
14 outreach methods, we observed important differences in socio-demographics, risk  
15  
16 exposures and HIV infection outcomes. Most notably, women sampled more recently  
17  
18 were more educated, had fewer sex partners, less time working in sex work and had  
19  
20 significantly lower prevalence of HIV. Where women worked was also very different in  
21  
22 the two cohorts: a much higher proportion of women sampled in 2009-10 compared to  
23  
24 2007-8 worked in entertainment-based establishments and fewer were brothel-based or  
25  
26 freelance FSW. These differences point to the notable changes in sex work typology and  
27  
28 environment that occurred following the enactment and enforcement in 2008 of anti-  
29  
30 trafficking legislation in Cambodia<sup>16</sup>. Brothel closures and increases in policing have  
31  
32 been acknowledged as a cause of significant social and occupational upheaval among  
33  
34 FSW, driving many women, especially former brothel-based FSW, "underground".<sup>10</sup> Both  
35  
36 government agencies and NGOs in Phnom Penh have reported negative impacts of the  
37  
38 legislation on FSW including: displacement and harassment and reduced access to  
39  
40 condoms and health care.<sup>10 20 24</sup> In our qualitative research, women confirmed these  
41  
42 impacts, describing how they moved to new venues or locales for sex work transactions  
43  
44 including apartments or houses rented by brothel owners following brothel closures<sup>16</sup>,  
45  
46 raising concerns about increased risks of HIV transmission as a result of the increasingly  
47  
48 clandestine nature of direct sex work. The significant increases in the number of women  
49  
50 involved in sex work also warrants attention.  
51  
52  
53  
54  
55  
56  
57  
58  
59  
60



1 The differences in HIV prevalence, risk profiles, and sex work environments reported by  
2 these two samples are consistent with both quantitative and qualitative research  
3 demonstrating how socio-political and environmental factors can increase vulnerability  
4 to HIV among FSW.<sup>48-51</sup> The time period in which these two cohorts were sampled,  
5 corresponded with increased criminalization of sex work which impacted the number  
6 and settings of transactional sex. These shifts can have mixed effects. First, women  
7 engaged in entertainment-based work have lower risk profiles than women engaged in  
8 freelance sex work.<sup>5</sup> The shorter duration of sex work reported by entertainment-based  
9 FSW likely contributes to the lower HIV prevalence in this group. Protective effects of  
10 entertainment-based work may include having a boss or manager; odds of HIV among  
11 women who say they have a boss or manager are lower compared to women who do  
12 not (OR: 0.40; 95% CI 0.19, 0.90).<sup>5</sup> We also explored these factors in qualitative  
13 interviews with FSW.<sup>16</sup> Brothel and entertainment-based sex workers reported that the  
14 'boss/manager' mitigated risk of violence from clients and problems with police. Also,  
15 women working in entertainment establishments report earning up to three times more  
16 (US \$50-\$60 or in \$200,000-\$240,000 Cambodian Riel) per client than women who  
17 worked in brothels or streets and parks.<sup>16</sup> This is substantiated by the two cohorts'  
18 report of similar income levels despite differences in the number of sex partners. It is  
19 also possible that entertainment-based FW have lower risk partners than brothel-based  
20 and freelance FSW. We believe that despite the lower prevalence of HIV and the lower  
21 number of male sex partners reported by this growing group of FSW, there is significant  
22 potential for amplified transmission of HIV at a population level, due principally to the  
23 extraordinary growth in the size of the population engaged in sex work. The numbers  
24 enumerated by the government, are likely to include a high proportion of entertainment-  
25 based FSW who have significantly lower risk overall. But it is unclear if how well the  
26 population of high risk women, those previously working in brothels, who were not  
27  
28  
29  
30  
31  
32  
33  
34  
35  
36  
37  
38  
39  
40  
41  
42  
43  
44  
45  
46  
47  
48  
49  
50  
51  
52  
53  
54  
55  
56  
57  
58  
59  
60



1  
2  
3  
4  
5  
6  
7  
8  
9  
10  
11  
12  
13  
14  
15  
16  
17  
18  
19  
20  
21  
22  
23  
24  
25  
26  
27  
28  
29  
30  
31  
32  
33  
34  
35  
36  
37  
38  
39  
40  
41  
42  
43  
44  
45  
46  
47  
48  
49  
50  
51  
52  
53  
54  
55  
56  
57  
58  
59  
60

apparent or represented in our latter sample, are apparent in the census. These women now displaced, may or may not be counted, but are highly likely to be engaged in clandestine transactional sex, as suggested by our qualitative research. Women sampled in the YWHS-2 reflect the majority of the growing population of low risk entertainment workers: they report fewer exposures and have lower HIV prevalence, however our qualitative data also suggests that unprotected sex, length of sexual transactions, sex in risky environments may have increased<sup>16 45</sup>. While we cannot establish that the criminalization of sex work causes increases in population HIV risk from this limited data, results from these studies correspond to marked shifts in the demographic and risk population that should be investigated more thoroughly.

The two cohorts also showed differences in drug and alcohol use exposures. Our group has identified ATS use as a significant independent risk factor for HIV related risk behaviour including number of sex partners (Adjusted Risk Ratio (ARR): 1.49; 95% CI 1.0, 2.21) and incident STI (AOR: 5.41; 95% CI 1.15, 25.48)<sup>39</sup>. Alcohol use is also emerging as a potential HIV-related risk factor<sup>16</sup>, although not well quantified among FSW, especially those working in entertainment establishments (or their male partners). Entertainment venues largely revolve around alcohol, and women working at these are generally employed as hostesses, waitresses, or as "promoters" such as "beer promotion girls" in a variety of venues.<sup>16 21</sup> Women who were working in the entertainment sector were more likely to both report more days of drinking, and more days intoxicated, than brothel or street-based FSW. Alcohol use can be a barrier to effective condom use and condom negotiation in the transactional context.<sup>16 52</sup> Although women in the two samples did not report differences in inconsistent condom use, we have previously found that women who report heavy alcohol use are also significantly more likely to report inconsistent condom use.<sup>39</sup> Given how entwined drug and alcohol

1 use are with sex work, especially in the growing entertainment-based sector, there is a  
2  
3 significant need to better elucidate ways to mitigate HIV-associated risks among women  
4  
5 whose livelihood depends on working in these establishments. Designing and  
6  
7 implementing prevention in these contexts will require input, not only from working  
8  
9 women, but also from the wider business sector, as well as male clients.<sup>48 53-56</sup>  
10  
11  
12  
13  
14

15 The differences in HIV and risk profiles between the women in our two samples, as well  
16  
17 as outreach efforts by HIV prevention organizations, may be a result of reaching “low  
18  
19 hanging fruit” resulting from both substantive increases in the number of women  
20  
21 working in entertainment establishments, and the increased challenges of engaging  
22  
23 women with higher risk and who are HIV infected for the reasons described above. FSW  
24  
25 in Phnom Penh have historically been easily accessed for prevention and surveillance  
26  
27 efforts. However, recent changes in the sex work landscape suggest that alternative  
28  
29 sampling methods, such as respondent driven sampling, may result in better access to  
30  
31 higher risk women who are more hidden and therefore hard to reach in this new legal  
32  
33 climate.<sup>57</sup>  
34  
35  
36  
37  
38  
39

40 HIV prevention remains an important and essential priority for all women engaged in  
41  
42 transactional sex. A recent systematic review confirms that FSW in Asia have the  
43  
44 highest odds of infection compared to women of reproductive age in the general  
45  
46 population.<sup>58</sup> In addition to new structural interventions aimed at reducing risk in the  
47  
48 work-based environment, the very high prevalence and risk of HIV among FSW in  
49  
50 Cambodia suggests a need for combination HIV prevention interventions including  
51  
52 biomedical (pre-exposure prophylaxis, microbicides, and treatment as prevention),  
53  
54 behavioural and development approaches (such as microfinance or income generating  
55  
56 opportunities).<sup>59-64</sup>  
57  
58  
59  
60

1  
2  
3  
4 Several limitations of these analyses should be noted. First results presented here are  
5  
6 cross-sectional and thus associations do not reflect causality. The comparison of the  
7  
8 serial samples is ecological in nature and does not prove temporal effects. The sample  
9  
10 sizes are small and thus subject to limitations with respect to generalizability. Many  
11  
12 exposures are self-reported and thus may reflect social desirability bias, especially  
13  
14 condom use which we have found has been over-reported based on biomarker data.<sup>65</sup>  
15  
16 On the other hand, we have found that self-reported ATS use is accurate compared to  
17  
18 urine toxicology screening, suggesting that measures of drug and alcohol use in this  
19  
20 group are accurate.<sup>66</sup>  
21  
22  
23  
24  
25  
26

27 Results from this analysis provide important insights into recent shifts in the context of  
28  
29 sex work and risk in young FSW in Phnom Penh, highlight challenges to HIV prevention  
30  
31 in this environment, and also point to the need for more research. Conflicting trends,  
32  
33 including the criminalization and suppression of direct sex work while the indirect  
34  
35 entertainment-based sex work industry is flourishing, has potentially set a new stage.  
36  
37 Unless there is acknowledgment and access to women who are more directly engaged in  
38  
39 sex work, these women will be poorly represented in any national HIV or behavioural  
40  
41 surveillance. They will remain hidden and stigmatized, subject to repression, violence  
42  
43 and potentially with less access to prevention or care. While the 100% condom use  
44  
45 program had its criticisms, that policy at least acknowledged the existence and need for  
46  
47 HIV prevention at a multisectoral level for FSW. The current socio-political climate has  
48  
49 potentially reversed these benefits, by denying the existence of FSW. Further in-depth  
50  
51 research among both FSW, their male clients and among entertainment venue  
52  
53 management would help to elucidate the impacts, both positive and negative of these  
54  
55 new laws. The exponential growth of entertainment-based sex work has the potential to  
56  
57  
58  
59  
60

1 result in an expanding HIV epidemic among young women in Cambodia. From a  
2  
3 programmatic perspective entertainment-based FSW are much easier to reach but likely  
4  
5 require different HIV prevention interventions than the 100% condom use program.  
6  
7 Implementation of research and programmatic efforts that integrate health, social  
8  
9 empowerment, and safe work environments for HIV prevention remain a high priority  
10  
11 for women engaged in sex work in Cambodia.<sup>67</sup>  
12  
13  
14  
15  
16

## 17 **Funding**

18 U.S. National Institutes of Health  
19

## 20 **Competing Interests**

21 None  
22

## 23 **Contributorship**

24 All authors contributed to the design and implementation of the YWHS-1 and -2 studies. Authors KP,  
25  
26 ES, JE, and LM compiled the first draft of the manuscript, which was reviewed by NS, M-CC, KS,  
27  
28 MC, JM\_S, PP, JK. The primary statistical analysis was conducted by JE and M-CC; KS and MC  
29  
30 provided supplemental data review, and KP reviewed all data analyses. All authors contributed to and  
31  
32 have approved the final manuscript. The YWHS Collaborative is a steering committee who reviewed  
33  
34 and approved the study protocols, and provided expertise into some or all of the studies' methods and  
35  
36 implementation.  
37  
38  
39  
40  
41  
42  
43  
44

## 45 **Data sharing**

46 No additional data are available.  
47  
48  
49  
50  
51  
52  
53  
54  
55  
56  
57  
58  
59  
60

## References

1. NCHADS. Ministry of Health National Center for HIV, AIDS, Dermatology and STDs. Annual Report 2009: National Centre for HIV/AIDS, Dermatology and STDs, Cambodia; <http://www.nchads.org/report.php>; Accessed July 8, 2011, 2011.
2. Saphonn V, Sopheab H, Sun LP, et al. Current HIV/AIDS/STI epidemic: intervention programs in Cambodia, 1993-2003. *AIDS Educ Prev* 2004;16(3 Suppl A):64-77.
3. NCHADS. Behavioral Sentinel Surveillance 2010. *Cambodia National Center for HIV, AIDS, Dermatology and STD Dissemination Conference, December 30, 2010* 2011.
4. NCHADS. Ministry of Health National Center for HIV, AIDS, Dermatology and STDs. Estimation of the HIV prevalence among the general population in Cambodia. : National Centre for HIV/AIDS, Dermatology and STDs, Cambodia; <http://www.nchads.org/index.php?id=20&event=146> Accessed July 8, 2011, 2011.
5. Couture MC, Sansothy N, Saphonn V, et al. Young women engaged in sex work in Phnom Penh, Cambodia, have high incidence of HIV and sexually transmitted infections, and amphetamine-type stimulant use: new challenges to HIV prevention and risk. *Sex Transm Dis* 2011;38(1):33-9.
6. Sopheab H, Saphonn V, Chhea C, et al. Distribution of HIV in Cambodia: findings from the first national population survey. *AIDS* 2009;23(11):1389-95.
7. Sopheab H, Morineau G, Neal JJ, et al. Sustained high prevalence of sexually transmitted infections among female sex workers in Cambodia: high turnover seriously challenges the 100% Condom Use Programme. *BMC Infect Dis* 2008;8:167.
8. Sopheab H, Gorbach PM, Gloyd S, et al. Rural sex work in Cambodia: work characteristics, risk behaviours, HIV, and syphilis. *Sex Transm Infect* 2003;79(4):e2.
9. Saphonn V, Parekh BS, Dobbs T, et al. Trends of HIV-1 Seroincidence Among HIV-1 Sentinel Surveillance Groups in Cambodia, 1999-2002. *J Acquir Immune Defic Syndr* 2005;39(5):587-592.
10. UNAIDS. Cambodia Country Progress Report: Monitoring the Progress towards the Implementation of the Declaration of Commitment on HIV and AIDS. Reporting period: January 2010-December 2011. Prepared by National AIDS Authority for United Nations General Assembly Special Session (UNGASS). . <http://www.unaids.org/en/regionscountries/countries/cambodia/> Accessed December 28, 2012.
11. UNAIDS. HIV in Asia and the Pacific: Getting to Zero. [http://www.unaids.org/en/media/unaids/contentassets/documents/unaidspublication/2011/20110826\\_APGettingToZero\\_en.pdf](http://www.unaids.org/en/media/unaids/contentassets/documents/unaidspublication/2011/20110826_APGettingToZero_en.pdf) 2011;Accessed December 20, 2011.
12. Samnang P, Leng HB, Kim A, et al. HIV prevalence and risk factors among fishermen in Sihanouk Ville, Cambodia. *Int J STD AIDS* 2004;15(7):479-83.
13. Nishigaya K. Female garment factory workers in Cambodia: migration, sex work and HIV/AIDS. *Women Health* 2002;35(4):27-42.
14. Patterson D. Southeast Asia: national policy audits on HIV and migration. *HIV AIDS Policy Law Rev* 2005;10(3):31, 33.
15. Hor LB, Detels R, Heng S, Mun P. The role of sex worker clients in transmission of HIV in Cambodia. *Int J STD AIDS* 2005;16(2):170-4.
16. Maher L, Mooney-Somers J, Phlong P, et al. Selling sex in unsafe spaces: Sex work risk environments in Phnom Penh, Cambodia. *Harm Reduct J* 2011;8(1):30.

- 1 17. Plummer R. The sex industry in Cambodia: the traffic police. . *The Economist* June  
2 11, 2009.
- 3 18. UNIAP. United Nations Inter-Agency Project on Human Trafficking (Phase III).  
4 Cambodia: Exodus to the sex trade? Effects of the global financial crisis on  
5 women's working conditions and opportunities. *Report* [http://www.no-  
7 trafficking.org/reports\\_docs/siren/siren\\_cb-04.pdf](http://www.no-<br/>6 trafficking.org/reports_docs/siren/siren_cb-04.pdf); Accessed August 31, 2009.
- 8 19. UNAIDS pr. More women in Cambodia turning to sex trade amid financial crisis – UN  
9 report.  
10 [http://www.un.org/apps/news/story.asp?NewsID=31541&Cr=human+trafficking  
12 &Cr1=](http://www.un.org/apps/news/story.asp?NewsID=31541&Cr=human+trafficking<br/>11 &Cr1=) 2009.
- 13 20. KHANA. Mapping the pattern of sex workers, entertainment establishments, and  
14 men who have sex with men in Cambodia. Accessed July 9, 2011. Report by Hor  
15 Bun Leng, M.D, and Tuot Sovaranny, March. 2008.
- 16 21. Kim AA, Sun LP, Chhorvann C, et al. High prevalence of HIV and sexually  
17 transmitted infections among indirect sex workers in Cambodia. *Sex Transm Dis*  
18 2005;32(12):745-51.
- 19 22. Gorbach PM, Sopheab H, Chhorvann C, et al. Changing behaviors and patterns  
20 among Cambodian sex workers: 1997-2003. *Journal of Acquired Immune*  
21 *Deficiency Syndromes* 2006;42(2):242-7.
- 22 23. Ghys PD, Jenkins C, Pisani E. HIV surveillance among female sex workers. *Aids*  
23 2001;15 Suppl 3:S33-40.
- 24 24. Francis C. HIV prevention and anti-trafficking in conflict? The public health  
25 consequences of Cambodia's fight against trafficking. FHI (in collaboration with  
26 PSI, Care, UNAIDS); December 2008.
- 27 25. FHI. SMARTgirl Program to Reduce Risk and Inspire Behavior Change. .  
28 [http://www.fhi.org/en/CountryProfiles/Cambodia/res\\_SMARTgirl.htm#](http://www.fhi.org/en/CountryProfiles/Cambodia/res_SMARTgirl.htm#) Accessed  
29 July 15th, 2011.
- 30 26. Burke KP, Munshaw S, Osburn WO, et al. Immunogenicity and cross-reactivity of a  
31 representative ancestral sequence in hepatitis C virus infection. *J Immunol*  
32 2012;188(10):5177-88.
- 33 27. Lamptey PR. Reducing heterosexual transmission of HIV in poor countries. *Bmj*  
34 *Clinical Research Ed.* 2002;324(7331):207-11.
- 35 28. UNODC. Patterns and Trends of Amphetamine Type Stimulants and other drugs;  
36 Asia and the Pacific. *The Global SMART Programme (Synthetics Monitoring:  
37 Analyses, Reporting, Trends)*  
38 <http://www.unodc.org/unodc/en/scientists/smart.html> (Accessed January 5,  
39 2012) 2011.
- 40 29. Ahmad K. Increased use of amphetamine-type stimulants threatens east Asian  
41 countries. *Lancet* 2002;359(9321):1927.
- 42 30. Ahmad K. Asia grapples with spreading amphetamine abuse. *Lancet*  
43 2003;361(9372):1878-9.
- 44 31. Kulsudjarit K. Drug problem in southeast and southwest Asia. *Ann N Y Acad Sci*  
45 2004;1025:446-57.
- 46 32. Farrell M, Marsden J, Ali R, et al. Methamphetamine: drug use and psychoses  
47 becomes a major public health issue in the Asia Pacific region. *Addiction*  
48 2002;97(7):771-2.
- 49 33. Mongkolsirichaikul D, Mokkhaveva C, Ratanabanangkoon K. The incidence of  
50 amphetamine use among truck drivers from various regions of Thailand. *J Med*  
51 *Assoc Thai* 1988;71(9):471-4.
- 52  
53  
54  
55  
56  
57  
58  
59  
60



- 1 34. Vongsheree S, Sri-Ngam P, Ruchusatsawat N, et al. High HIV-1 prevalence among  
2 metamphetamine users in central Thailand, 1999-2000. *J Med Assoc Thai*  
3 2001;84(9):1263-7.
- 4 35. Dayrit FM, Dumlao MC. Impurity profiling of methamphetamine hydrochloride drugs  
5 seized in the Philippines. *Forensic Sci Int* 2004;144(1):29-36.
- 6 36. Lin SK, Ball D, Hsiao CC, et al. Psychiatric comorbidity and gender differences of  
7 persons incarcerated for methamphetamine abuse in Taiwan. *Psychiatry Clin*  
8 *Neurosci* 2004;58(2):206-12.
- 9 37. Lua AC, Lin HR, Tseng YT, et al. Profiles of urine samples from participants at rave  
10 party in Taiwan: prevalence of ketamine and MDMA abuse. *Forensic Sci Int*  
11 2003;136(1-3):47-51.
- 12 38. Razak MH, Jittiwutikarn J, Suriyanon V, et al. HIV prevalence and risks among  
13 injection and noninjection drug users in northern Thailand: need for  
14 comprehensive HIV prevention programs. *J Acquir Immune Defic Syndr*  
15 2003;33(2):259-66.
- 16 39. Couture MC, Evans JL, Sothy NS, et al. Correlates of amphetamine-type stimulant  
17 use and associations with HIV-related risks among young women engaged in sex  
18 work in Phnom Penh, Cambodia. *Drug Alcohol Depend* 2012;120(1-3):119-26.
- 19 40. Melbye K, Khamboonruang C, Kunawararak P, et al. Lifetime correlates associated  
20 with amphetamine use among northern Thai men attending STD and HIV  
21 anonymous test sites. *Drug Alcohol Depend* 2002;68(3):245-53.
- 22 41. Sattah MV, Supawitkul S, Dondero TJ, et al. Prevalence of and risk factors for  
23 methamphetamine use in northern Thai youth: results of an audio-computer-  
24 assisted self-interviewing survey with urine testing. *Addiction* 2002;97(7):801-8.
- 25 42. Buavirat A, Page-Shafer K, van Griensven GJ, et al. Risk of prevalent HIV infection  
26 associated with incarceration among injecting drug users in Bangkok, Thailand:  
27 case-control study. *BMJ* 2003;326(7384):308.
- 28 43. Beyrer C, Razak MH, Jittiwutikarn J, et al. Methamphetamine users in northern  
29 Thailand: changing demographics and risks for HIV and STD among treatment-  
30 seeking substance abusers. *Int J STD AIDS* 2004;15(10):697-704.
- 31 44. Vanichseni S, Tappero JW, Pitisuttithum P, et al. Recruitment, screening and  
32 characteristics of injection drug users participating in the AIDS VAX B/E HIV  
33 vaccine trial, Bangkok, Thailand. *Aids* 2004;18(2):311-6.
- 34 45. Maher L, Phlong P, Mooney-Somers J, et al. Amphetamine-type stimulant use and  
35 HIV/STI risk behaviour among young female sex workers in Phnom Penh,  
36 Cambodia. *Int J Drug Policy* 2011;22(3):203-9.
- 37 46. Kab V, Evans J, Sansothy N, et al. Testing for amphetamine-type stimulant (ATS)  
38 use to ascertain validity of self-reported ATS use among young female sex  
39 workers in Cambodia. *Masters Thesis for University of California Berkeley, School*  
40 *of Public Health, MPH in Epidemiology and Biostatistics. Completed May 15, 2011.*
- 41 47. Chattergoon MA, Levine JS, Latanich R, et al. High plasma interleukin-18 levels  
42 mark the acute phase of hepatitis C virus infection. *J Infect Dis*  
43 2011;204(11):1730-40.
- 44 48. Yang C, Latkin C, Luan R, et al. Condom use with female sex workers among male  
45 clients in Sichuan Province, China: the role of interpersonal and venue-level  
46 factors. *J Urban Health* 2010;87(2):292-303.
- 47 49. Erausquin JT, Reed E, Blankenship KM. Police-related experiences and HIV risk  
48 among female sex workers in Andhra Pradesh, India. *J Infect Dis* 2011;204 Suppl  
49 5: S1223-8.
- 50  
51  
52  
53  
54  
55  
56  
57  
58  
59  
60

- 1 50. Shannon K, Kerr T, Allinott S, et al. Social and structural violence and power  
2 relations in mitigating HIV risk of drug-using women in survival sex work. *Soc Sci*  
3 *Med* 2008;66(4):911-21.
- 4 51. Shannon K, Kerr T, Strathdee SA, et al. Prevalence and structural correlates of  
5 gender based violence among a prospective cohort of female sex workers. *BMJ*  
6 2009;339:b2939.
- 7 52. Kalichman SC, Simbayi LC, Kaufman M, et al. Alcohol use and sexual risks for  
8 HIV/AIDS in sub-Saharan Africa: systematic review of empirical findings. *Prev Sci*  
9 2007;8(2):141-51.
- 10 53. Morisky DE, Chiao C, Ksobiech K, et al. Reducing alcohol use, sex risk behaviors,  
11 and sexually transmitted infections among Filipina female bar workers: effects of  
12 an ecological intervention. *J Prev Interv Community* 2010;38(2):104-17.
- 13 54. Surratt HL, Inciardi JA. An effective HIV risk-reduction protocol for drug-using  
14 female sex workers. *J Prev Interv Community* 2010;38(2):118-31.
- 15 55. Argento E, Reza-Paul S, Lorway R, et al. Confronting structural violence in sex  
16 work: lessons from a community-led HIV prevention project in Mysore, India.  
17 *Aids Care* 2011;23(1):69-74.
- 18 56. Reza-Paul S, Beattie T, Syed HU, et al. Declines in risk behaviour and sexually  
19 transmitted infection prevalence following a community-led HIV preventive  
20 intervention among female sex workers in Mysore, India. *Aids* 2008;22 Suppl  
21 5:S91-100.
- 22 57. Johnston LG, Sabin K, Mai TH, et al. Assessment of respondent driven sampling for  
23 recruiting female sex workers in two Vietnamese cities: reaching the unseen sex  
24 worker. *J Urban Health* 2006;83(6 Suppl):i16-28.
- 25 58. Baral S, Beyrer C, Muessig K, et al. Burden of HIV among female sex workers in  
26 low-income and middle-income countries: a systematic review and meta-analysis.  
27 *Lancet Infect Dis* 2012;12(7):538-49.
- 28 59. Merson M, Padian N, Coates TJ, et al. Combination HIV prevention. *Lancet*  
29 2008;372(9652):1805-6.
- 30 60. Abdool Karim Q, Abdool Karim SS, Frohlich JA, et al. Effectiveness and safety of  
31 tenofovir gel, an antiretroviral microbicide, for the prevention of HIV infection in  
32 women. *Science* 2010;329(5996):1168-74.
- 33 61. Grant RM, Lama JR, Anderson PL, et al. Preexposure chemoprophylaxis for HIV  
34 prevention in men who have sex with men. *N Engl J Med* 2010;363(27):2587-99.
- 35 62. Dworkin SL, Blankenship K. Microfinance and HIV/AIDS prevention: assessing its  
36 promise and limitations. *AIDS Behav* 2009;13(3):462-9.
- 37 63. Pronyk PM, Kim JC, Abramsky T, et al. A combined microfinance and training  
38 intervention can reduce HIV risk behaviour in young female participants. *AIDS*  
39 2008;22(13):1659-65.
- 40 64. Rosenberg MS, Seavey BK, Jules R, et al. The Role of a Microfinance Program on  
41 HIV Risk Behavior Among Haitian Women. *AIDS Behav* 2011;15(5):911-8.
- 42 65. Evans J, Couture M-C, Stein ES, et al. Biomarker validation of recent unprotected  
43 sexual intercourse in a prospective study of young women engaged in sex work in  
44 Phnom Penh, Cambodia. . *STD* in press.
- 45 66. Kab V, Evans J, Sansothy N, et al. Testing for amphetamine-type stimulant (ATS)  
46 use to ascertain validity of self-reported ATS use among young female sex  
47 workers in Cambodia. . *Addiction Science & Clinical Practice* 2012;7:11-25.
- 48 67. Tucker JD, Tuminez AS. Reframing the interpretation of sex worker health: a  
49 behavioral-structural approach. *J Infect Dis* 2011;204 Suppl 5:S1206-10.
- 50
- 51
- 52
- 53
- 54
- 55
- 56
- 57
- 58
- 59
- 60



**Table 1: Selected socio-demographic characteristics, occupational, and risk exposures in two cohorts of high risk young women in Phnom Penh, Cambodia: YWHS-1 (2006-2007) and YWHS-2 (2009-2010)**

| Characteristic                                           | YWHS-1<br>N=160                 |      | YWHS-2<br>N=153*                |      | p-value |
|----------------------------------------------------------|---------------------------------|------|---------------------------------|------|---------|
|                                                          | Prevalence of<br>characteristic |      | Prevalence of<br>characteristic |      |         |
|                                                          | N                               | %    | N                               | %    |         |
| <b>Age (years, median (IQR))</b>                         | 25 (21 – 27)                    |      | 25 ( 22 – 28)                   |      | 0.56    |
| 16-18                                                    | 13                              | 8.1  | 11                              | 7.2  | 0.86    |
| 19-24                                                    | 64                              | 40.0 | 58                              | 37.9 |         |
| 25-29                                                    | 83                              | 51.8 | 84                              | 54.9 |         |
| <b>Marital status</b>                                    |                                 |      |                                 |      |         |
| Never married                                            | 57                              | 35.6 | 38                              | 24.8 | <0.01   |
| Married-living together                                  | 24                              | 15.0 | 48                              | 31.4 |         |
| Widowed/Divorced/Separated                               | 79                              | 49.4 | 67                              | 43.8 |         |
| <b>Education (years)</b>                                 |                                 |      |                                 |      |         |
| None                                                     | 64                              | 40.0 | 23                              | 15.0 | <0.01   |
| Primary (1-6 years)                                      | 82                              | 51.3 | 91                              | 59.5 |         |
| Secondary (7+ years)                                     | 14                              | 8.8  | 39                              | 25.5 |         |
| <b>Age at first sex (median (IQR))</b>                   | 17 (16 – 18)                    |      | 18 ( 16 – 19)                   |      | 0.03    |
| ≤ 15                                                     | 32                              | 20.1 | 22                              | 14.5 | 0.19    |
| > 15                                                     | 127                             | 79.9 | 130                             | 85.5 |         |
| <b>Length of employment as FSW (years, median (IQR))</b> | 4.3 (2.5 – 6.3)                 |      | 3 (1.7 – 5)                     |      | <0.01   |
| <b>Current employment venue (last 30 days)</b>           |                                 |      |                                 |      |         |
| Entertainment                                            | 51                              | 31.9 | 113                             | 74.3 | <0.01†  |
| Brothel                                                  | 23                              | 9.2  | 3                               | 2.0  |         |
| Freelance                                                | 59                              | 39.3 | 29                              | 19.1 |         |
| Other/Multiple                                           | 27                              | 16.9 | 7                               | 4.6  |         |
| <b>Have a manager, boss or supervisor</b>                |                                 |      |                                 |      |         |
| No                                                       | 82                              | 53.6 | 28                              | 14.4 | <0.01   |
| Yes                                                      | 71                              | 46.4 | 124                             | 81.6 |         |
| <b>Income in past month (US \$)</b>                      |                                 |      |                                 |      |         |
| Less than \$100                                          | 68                              | 42.5 | 50                              | 32.9 | 0.18    |
| 100-150\$                                                | 35                              | 21.9 | 43                              | 29.3 |         |

|                                                            |              |      |             |      |       |
|------------------------------------------------------------|--------------|------|-------------|------|-------|
| Over 150\$                                                 | 57           | 35.6 | 59          | 38.8 |       |
|                                                            |              |      |             |      |       |
| <b>Number of sex partners in last month (median (IQR))</b> | 30 (10 – 90) |      | 5 (3 – 13)  |      | <0.01 |
| ≤10                                                        | 45           | 28.1 | 112         | 73.2 | <0.01 |
| 11 – 50                                                    | 53           | 33.1 | 41          | 26.8 |       |
| > 50                                                       | 62           | 38.8 | 0           | 0    |       |
|                                                            |              |      |             |      |       |
| <b>Condom use with last paying partner</b>                 |              |      |             |      |       |
| Consistent (always)                                        | 108          | 85.7 | 86          | 87.8 | 0.66  |
| Inconsistent                                               | 18           | 14.3 | 12          | 12.2 |       |
|                                                            |              |      |             |      |       |
| <b>Condom use with last non paying partner</b>             |              |      |             |      |       |
| Consistent (always)                                        | 7            | 20.6 | 10          | 18.2 | 0.78  |
| Inconsistent                                               | 27           | 79.4 | 45          | 81.8 |       |
|                                                            |              |      |             |      |       |
| <b>Number of days drink alcohol (last month)</b>           | 15 (2 – 30)  |      | 18 (5 – 28) |      | 0.76  |
| 0 – 4                                                      | 65           | 40.6 | 36          | 23.5 | <0.01 |
| 5 – 19                                                     | 25           | 15.6 | 42          | 27.5 |       |
| ≥ 20                                                       | 70           | 43.7 | 75          | 49.0 |       |
|                                                            |              |      |             |      |       |
| <b>Number of days drunk (last month)</b>                   | 5 (1 – 20)   |      | 3 (1 – 10)  |      | 0.07  |
| 0 – 4                                                      | 89           | 55.6 | 86          | 56.2 | <0.01 |
| 5 – 19                                                     | 33           | 20.6 | 50          | 32.7 |       |
| ≥ 20                                                       | 38           | 23.7 | 17          | 11.1 |       |
|                                                            |              |      |             |      |       |
| <b>ATS use (ever)</b>                                      |              |      |             |      |       |
| No                                                         | 92           | 57.5 | 107         | 69.9 | 0.02  |
| Yes                                                        | 68           | 42.5 | 46          | 30.1 |       |
|                                                            |              |      |             |      |       |
| <b>ATS use (last 3 months)</b>                             |              |      |             |      |       |
| No                                                         | 116          | 73.4 | 117         | 76.5 | 0.54  |
| Yes                                                        | 42           | 26.6 | 36          | 23.5 |       |
|                                                            |              |      |             |      |       |
| <b>Ever used any drug prior to/during sex</b>              |              |      |             |      |       |
| No                                                         | 109          | 68.1 | 117         | 76.5 | 0.10  |
| Yes                                                        | 51           | 31.9 | 36          | 23.5 |       |
|                                                            |              |      |             |      |       |

\* Excludes women who participated in YWHS-1

†Fisher Exact p-value

Table 2: HIV prevalence overall and by current work venue in two cohorts of young high risk women in Phnom Penh, Cambodia: YWHS-1 (2006-2007) and YWHS-2 (2009-2010)

| Characteristic                                | YWHS-1<br>N=160 |                    | YWHS-2*<br>N=153* |                    | p-value |
|-----------------------------------------------|-----------------|--------------------|-------------------|--------------------|---------|
|                                               | N               | % (95% CI)         | N                 | %                  |         |
| <b>HIV positive</b>                           | 37              | 23.1 (16.5 – 29.7) | 14                | 9.2 (4.5 – 13.8)   | <0.01   |
| <b>HIV positive by employment venue (n/N)</b> |                 |                    |                   |                    |         |
| Entertainment                                 | 5/51            | 9.8 (1.5 – 18.1)   | 5/113             | 4.4 (0.6 – 8.2)    | <0.01   |
| Brothel                                       | 4/23            | 17.4 (1.5 – 33.3)  | 0/3               | 0                  |         |
| Freelance                                     | 22/59           | 37.3 (25.0 – 48.0) | 9/29              | 31.0 (13.8 – 48.2) |         |
| Other/Multiple                                | 6/27            | 22.2 (6.2 – 38.3)  | 0/7               | 0                  |         |

\* Excludes women who participated in YWHS-1

**Table 3: HIV testing history and behaviors in two cohorts of young high risk women in Phnom Penh, Cambodia: YWHS-1 (2006-2007) and YWHS-2 (2009-2010)**

| Characteristic                            | YWHS-1<br>N=160 |      | YWHS-2*<br>N=153* |      | p-value |
|-------------------------------------------|-----------------|------|-------------------|------|---------|
|                                           | N               | %    | N                 | %    |         |
| <b>Ever tested for HIV</b>                |                 |      |                   |      |         |
| No                                        | 58              | 36.5 | 31                | 20.3 | <0.01   |
| Yes                                       | 101             | 63.5 | 122               | 79.7 |         |
| <b>HIV test in last 3 months</b>          |                 |      |                   |      |         |
| No                                        | 126             | 79.3 | 119               | 77.8 | 0.75    |
| Yes                                       | 33              | 20.7 | 34                | 22.2 |         |
| <b>What was result of last HIV test?#</b> |                 |      |                   |      |         |
| Negative                                  | 84              | 84.0 | 114               | 93.4 | 0.04    |
| Positive                                  | 4               | 4.0  | 4                 | 3.3  |         |
| Don't know                                | 12              | 12.0 | 4                 | 3.3  |         |
| <b>Where received last HIV test#</b>      |                 |      |                   |      |         |
| Public hospital                           | 35              | 34.7 | 55                | 34.0 | 0.10    |
| Voluntary testing and counseling center   | 1               | 1.0  | 0                 | 0    |         |
| NGO clinic                                | 59              | 58.4 | 54                | 44.3 |         |
| Private hospital, clinic, or laboratory   | 6               | 5.9  | 13                | 10.7 |         |

\* Excludes women who participated in YWHS-1

# Among those who reported being previously tested for HIV

## Figure Legend

Figure 1: Venues where women in YWHS-2 and YWHS-2 reported ever working

Figure 2. Alcohol use in the past month and ATS use in the past 3 months reported by women in YWHS-1 and YWHS-2 by work venue: (A) Entertainment-based; (B) Brothel-based; (C) Freelance

For peer review only

1  
2  
3  
4  
5  
6  
7  
8  
9  
10  
11  
12  
13  
14  
15  
16  
17  
18  
19  
20  
21  
22  
23  
24  
25  
26  
27  
28  
29  
30  
31  
32  
33  
34  
35  
36  
37  
38  
39  
40  
41  
42  
43  
44  
45  
46  
47  
48  
49  
50  
51  
52  
53  
54  
55  
56  
57  
58  
59  
60

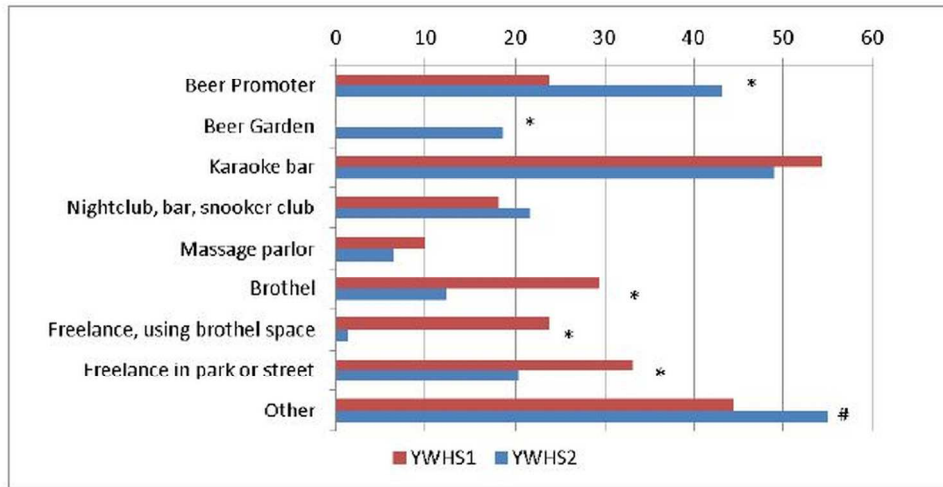

\* p≤0.05; # p=0.06

Venues where women in YWHS-1 and YWHS-2 reported ever working  
151x90mm (300 x 300 DPI)

review only

1  
2  
3  
4  
5  
6  
7  
8  
9  
10  
11  
12  
13  
14  
15  
16  
17  
18  
19  
20  
21  
22  
23  
24  
25  
26  
27  
28  
29  
30  
31  
32  
33  
34  
35  
36  
37  
38  
39  
40  
41  
42  
43  
44  
45  
46  
47  
48  
49  
50  
51  
52  
53  
54  
55  
56  
57  
58  
59  
60

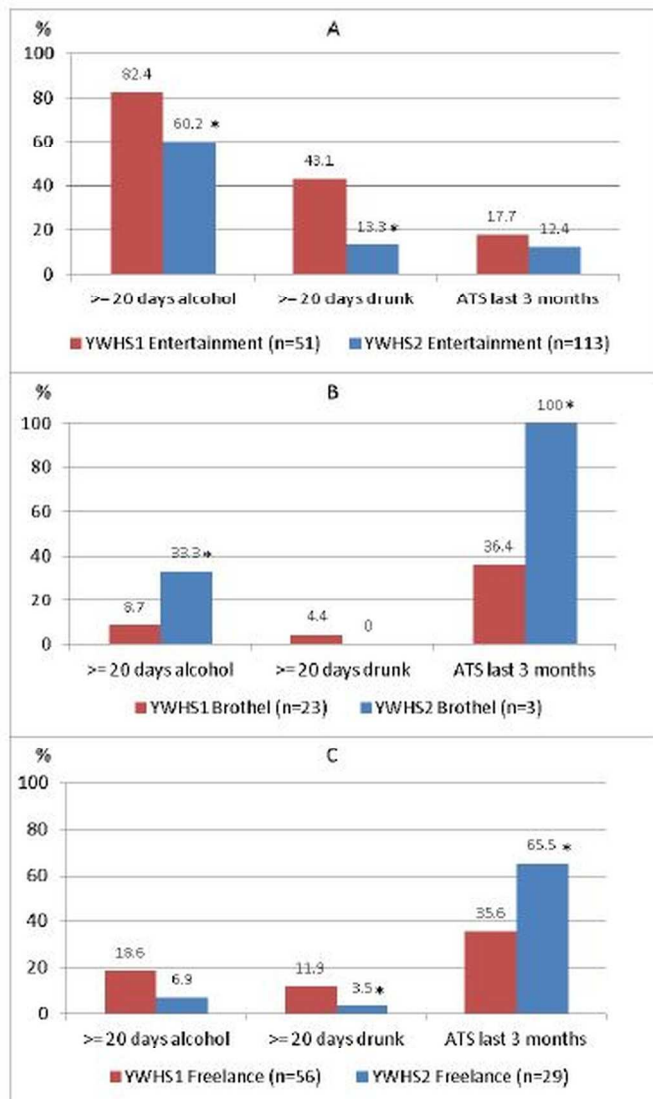

\*p<0.05

Alcohol use in the past month and ATS use in the past 3 months reported by women in YWHS-1 and YWHS-2 by work venue: (A) Entertainment-based; (B) Brothel-based; (C) Freelance  
106x183mm (300 x 300 DPI)

STROBE Statement—Checklist of items that should be included in reports of *cohort studies*

**Page et al., Sex work and HIV in Cambodia: trajectories of risk and disease in two cohorts of high risk young women in Phnom Penh, Cambodia**

|                              | Item No | Item, Section and PAGE NUMBER                                                                                                                                                                                                                                                                                                                                                                                                                                                                                                               |
|------------------------------|---------|---------------------------------------------------------------------------------------------------------------------------------------------------------------------------------------------------------------------------------------------------------------------------------------------------------------------------------------------------------------------------------------------------------------------------------------------------------------------------------------------------------------------------------------------|
| <b>Title and abstract</b>    | 1       | (a) Study's design with a commonly used terms – PAGE 1<br>(b) Provide in the abstract an informative and balanced summary of what was done and what was found – PAGE 3                                                                                                                                                                                                                                                                                                                                                                      |
| <b>Introduction</b>          |         |                                                                                                                                                                                                                                                                                                                                                                                                                                                                                                                                             |
| Background/rationale         | 2       | Scientific background and rationale for the investigation being reported – PAGE 7-9                                                                                                                                                                                                                                                                                                                                                                                                                                                         |
| Objectives                   | 3       | State specific objectives, including any prespecified hypotheses- PAGE 9                                                                                                                                                                                                                                                                                                                                                                                                                                                                    |
| <b>Methods</b>               |         |                                                                                                                                                                                                                                                                                                                                                                                                                                                                                                                                             |
| Study design                 | 4       | Present key elements of study design early in the paper- PAGE 9                                                                                                                                                                                                                                                                                                                                                                                                                                                                             |
| Setting                      | 5       | Describe the setting, locations, and relevant dates, including periods of recruitment, exposure, follow-up, and data collection- PAGE 9, 11                                                                                                                                                                                                                                                                                                                                                                                                 |
| Participants                 | 6       | (a) Give the eligibility criteria, and the sources and methods of selection of participants. Describe methods of follow-up- PAGE 10<br>(b) For matched studies, give matching criteria and number of exposed and unexposed                                                                                                                                                                                                                                                                                                                  |
| Variables                    | 7       | Clearly define all outcomes, exposures, predictors, - PAGE 10-12                                                                                                                                                                                                                                                                                                                                                                                                                                                                            |
| Data sources/<br>measurement | 8*      | For each variable of interest, give sources of data and details of methods of assessment (measurement). Describe comparability of assessment methods if there is more than one group – PAGE 10-12                                                                                                                                                                                                                                                                                                                                           |
| Bias                         | 9       | Describe any efforts to address potential sources of bias – NA (CROSS-SECTIONAL BASELINE DATA ONLY ARE INCLUDED IN THIS ANALYSIS)                                                                                                                                                                                                                                                                                                                                                                                                           |
| Study size                   | 10      | Explain how the study size was arrived at – PAGE 10                                                                                                                                                                                                                                                                                                                                                                                                                                                                                         |
| Quantitative variables       | 11      | Explain how quantitative variables were handled in the analyses. If applicable, describe which groupings were chosen and why- PAGE 12                                                                                                                                                                                                                                                                                                                                                                                                       |
| Statistical methods          | 12      | (a) Describe all statistical methods, including those used to control for confounding- PAGE 12<br>(b) Describe any methods used to examine subgroups and interactions- PAGE 12<br>(c) Explain how missing data were addressed- NA (BASELINE DATA ONLY ARE INCLUDED IN THIS ANALYSIS)<br>(d) If applicable, explain how loss to follow-up was addressed NA (CROSS-SECTIONAL BASELINE DATA ONLY ARE INCLUDED IN THIS ANALYSIS)<br>(e) Describe any sensitivity analyses NA (CROSS-SECTIONAL BASELINE DATA ONLY ARE INCLUDED IN THIS ANALYSIS) |
| <b>Results</b>               |         |                                                                                                                                                                                                                                                                                                                                                                                                                                                                                                                                             |
| Participants                 | 13*     | (a) Report numbers of individuals at each stage of study—eg numbers potentially eligible, examined for eligibility, confirmed eligible, included in the study, completing follow-up, and analysed- PAGE 12, 13<br>(b) Give reasons for non-participation at each stage NA (CROSS-SECTIONAL BASELINE DATA ONLY ARE INCLUDED IN THIS ANALYSIS)<br>(c) Consider use of a flow diagram NA                                                                                                                                                       |
| Descriptive data             | 14*     | (a) Give characteristics of study participants (eg demographic, clinical, social) and information on exposures and potential confounders- PAGE 12, 13, and TABLE 1                                                                                                                                                                                                                                                                                                                                                                          |



|                          |     |                                                                                                                                                                                                                                                                                                                                                                                                                                     |
|--------------------------|-----|-------------------------------------------------------------------------------------------------------------------------------------------------------------------------------------------------------------------------------------------------------------------------------------------------------------------------------------------------------------------------------------------------------------------------------------|
|                          |     | (b) Indicate number of participants with missing data for each variable of interest<br>NA                                                                                                                                                                                                                                                                                                                                           |
|                          |     | (c) Summarise follow-up time (eg, average and total amount) NA (CROSS-SECTIONAL BASELINE DATA ONLY ARE INCLUDED IN THIS ANALYSIS)                                                                                                                                                                                                                                                                                                   |
| Outcome data             | 15* | Report numbers of outcome events or summary measures over time – TABLE 1 AND 2                                                                                                                                                                                                                                                                                                                                                      |
| Main results             | 16  | (a) Give unadjusted estimates and, if applicable, confounder-adjusted estimates and their precision (eg, 95% confidence interval). Make clear which confounders were adjusted for and why they were included. TABLES 1 AND 2<br>(b) Report category boundaries when continuous variables were categorized NA<br>(c) If relevant, consider translating estimates of relative risk into absolute risk for a meaningful time period NA |
| Other analyses           | 17  | Report other analyses done—eg analyses of subgroups and interactions, and sensitivity analyses –PAGE 13                                                                                                                                                                                                                                                                                                                             |
| <b>Discussion</b>        |     |                                                                                                                                                                                                                                                                                                                                                                                                                                     |
| Key results              | 18  | Summarise key results with reference to study objectives – PAGE 14, 15                                                                                                                                                                                                                                                                                                                                                              |
| Limitations              | 19  | Discuss limitations of the study, taking into account sources of potential bias or imprecision. Discuss both direction and magnitude of any potential bias – PAGE 18                                                                                                                                                                                                                                                                |
| Interpretation           | 20  | Give a cautious overall interpretation of results considering objectives, limitations, multiplicity of analyses, results from similar studies, and other relevant evidence<br>PAGE 14-15                                                                                                                                                                                                                                            |
| Generalisability         | 21  | Discuss the generalisability (external validity) of the study results PAGE 18                                                                                                                                                                                                                                                                                                                                                       |
| <b>Other information</b> |     |                                                                                                                                                                                                                                                                                                                                                                                                                                     |
| Funding                  | 22  | Give the source of funding and the role of the funders for the present study and, if applicable, for the original study on which the present article is based PAGE 5                                                                                                                                                                                                                                                                |

\*Give information separately for exposed and unexposed groups.

**Note:** An Explanation and Elaboration article discusses each checklist item and gives methodological background and published examples of transparent reporting. The STROBE checklist is best used in conjunction with this article (freely available on the Web sites of PLoS Medicine at <http://www.plosmedicine.org/>, Annals of Internal Medicine at <http://www.annals.org/>, and Epidemiology at <http://www.epidem.com/>). Information on the STROBE Initiative is available at <http://www.strobe-statement.org>.

1 Sex work and HIV in Cambodia: trajectories of risk and disease in two cohorts of high  
2 risk young women in Phnom Penh, Cambodia  
3  
4  
5  
6  
7  
8  
9

10 Kimberly Page, Ph.D.<sup>1</sup>, Ellen Stein, MPH<sup>1</sup>, Neth Sansothy, M.D.<sup>2</sup>, Jennifer Evans, M.S.<sup>1</sup>,  
11 Marie-Claude Couture, Ph.D.<sup>1</sup>, Keo Sichan<sup>3</sup>, Melissa Cockroft, BA<sup>3\*</sup>, Julie Mooney-  
12 Somers, Ph.D.<sup>4, 5</sup>, Pisith Phlong, M.A.<sup>6</sup>, John Kaldor, Ph.D.<sup>4</sup>, Lisa Maher Ph.D.<sup>4</sup>, (on  
13 behalf of the Young Women's Health Study Collaborative: John Kaldor, Ph.D.<sup>4</sup>, Serey  
14 Phal Kien<sup>3</sup>, Kimberly Page, Ph.D.<sup>1</sup>, Joel M. Palefsky M.D.<sup>7</sup>, Vonthanak Saphonn, M.D.<sup>2</sup>,  
15 Mean Chhi Vun, M.D.<sup>2</sup>).  
16  
17  
18  
19  
20  
21  
22  
23  
24  
25  
26  
27  
28

- 29 1. University of California San Francisco, Department of Epidemiology and Biostatistics;  
30 San Francisco, and Global Health Sciences, 50 Beale St., 12<sup>th</sup> Floor, San Francisco, CA,  
31 94105; USA  
32  
33
- 34 2. National Center for HIV/AIDS, Dermatology and STDs (NCHADS), #245H, Street 6A,  
35 Phum Kean Khlang, Sangkat Prekleap Russey Keo, Phnom Penh, Cambodia  
36  
37
- 38 3. Cambodian Women's Development Association (CWDA); No. 19, Street 242, Boeung  
39 Prolit, Khan 7 Makara, Phnom Penh, Cambodia  
40  
41
- 42 4. The Kirby Institute (formerly the National Centre in HIV Epidemiology and Clinical  
43 Research); University of New South Wales, CFI building, corner of West and Boundary  
44 Streets, Darlinghurst, NSW 2010, Australia  
45  
46
- 47 5. The Centre for Values, Ethics and the Law in Medicine, The University of Sydney  
48 Level 1 of the Medical Foundation Building, 92-94 Parramatta Road, Camperdown, NSW,  
49 Australia  
50  
51
- 52 6. Royal University of Fine Arts, 72 Street 19, Phnom Penh, Cambodia.  
53  
54  
55  
56  
57  
58  
59  
60

1  
2  
3  
4  
5  
6  
7  
8  
9  
10  
11  
12  
13  
14  
15  
16  
17  
18  
19  
20  
21  
22  
23  
24  
25  
26  
27  
28  
29  
30  
31  
32  
33  
34  
35  
36  
37  
38  
39  
40  
41  
42  
43  
44  
45  
46  
47  
48  
49  
50  
51  
52  
53  
54  
55  
56  
57  
58  
59  
60

7. University of California San Francisco, Department of Medicine; 513 Parnassus Ave,  
Med Sci S-420; UCSF, San Francisco, San Francisco, CA. 94143 - 0654

\*Melissa Cockroft is currently at Marie Stopes International in Phnom Pehn, Cambodia

Address correspondence to:

Kimberly Page, Ph.D., MPH, Dept. of Epidemiology and Biostatistics, Global Health  
Sciences, University of California San Francisco, CA 94105; 50 Beale St., 12<sup>th</sup> Floor, San  
Francisco, CA USA, 94105. [kpage@psg.ucsf.edu](mailto:kpage@psg.ucsf.edu)

Word count: Abstract: 296; Text 3444; 3 Tables, 2 Figures.

Key words: Cambodia, female sex workers, HIV, STI, risk, amphetamine-type  
stimulant, alcohol, policy effects

Short title: HIV infection and risk in two samples of FSW in Phnom Penh, Cambodia

## Abstract

**Objectives:** HIV prevalence among Cambodian female sex workers (FSW) is among the highest in Southeast Asia. We describe HIV prevalence and associated risk exposures in FSW sampled serially in Phnom Penh, Cambodia (Young Women's Health Study (YWHS), before and after the implementation of a new law designed to combat human trafficking and sexual exploitation.

**Design:** Cross-sectional analysis of baseline data from two prospective cohorts.

**Setting:** Community-based study in Phnom Penh, Cambodia.

**Participants:** Women aged 15-29 years, reporting  $\geq 2$  sexual partners in the last month and/or engaged in transactional sex in the last 3 months, were enrolled in the studies in 2007 (N=161; YWHS-1), and 2009 (N=220; YWHS-2) following information sessions where 285 and 345 women attended.

**Primary outcomes:** HIV prevalence, sexual risk behaviour, amphetamine-type stimulant (ATS) and alcohol use, and work-related factors were compared the two groups, enrolled before and after implementation of the new law.

**Results:** Participants and in the two cohorts were similar in age (median 25 years), but YWHS-2 women reported fewer sex partners, more alcohol use, and less ATS use. A higher proportion of YWHS-2 compared to YWHS-1 women worked in entertainment-based venues (68% vs. 31%, respectively). HIV prevalence was significantly lower in the more recently sampled women: 9.2% (95% CI 4.5, 13.8) vs. 23% (95% CI 16.5, 29.7).

**Conclusions:** Sex work context and risk has shifted among young FSW in Phnom Penh, following implementation of anti-prostitution and anti-trafficking laws. While both cohorts were recruited using the same eligibility criteria, more recently sampled women had lower prevalence of sexual risk and HIV infection. Women engaged more directly in transactional sex have become harder to sample and access. Future prevention

1 research and programs need to consider how new policies and demographic changes in  
2  
3  
4 FSW impact HIV transmission.  
5  
6  
7  
8  
9  
10  
11  
12  
13  
14  
15  
16  
17  
18  
19  
20  
21  
22  
23  
24  
25  
26  
27  
28  
29  
30  
31  
32  
33  
34  
35  
36  
37  
38  
39  
40  
41  
42  
43  
44  
45  
46  
47  
48  
49  
50  
51  
52  
53  
54  
55  
56  
57  
58  
59  
60

For peer review only

## Article summary

### Article Focus

- HIV prevalence and incidence in two serial samples of young female sex workers in Phnom Penh, Cambodia (2007-2008, and 2009-2010);
- Comparison of baseline risk and HIV outcomes, including sexual behavior, drug and alcohol use in the two cohorts sampled before and after implementation of anti-trafficking and sexual exploitation laws in 2008;
- Impact of anti-trafficking and sexual exploitation legislation on female sex workers and HIV risk.

### Key Messages

- Women sampled using the same eligibility criteria and outreach methods in differed with respect to risk exposures and HIV outcomes;
- Changes in sex work typology and environment are evident after enactment of the anti-trafficking laws, including very few brothel-based FSW and significantly more FSW based in the entertainment sector;
- Shifts in the context of sex work and risk highlight the ongoing need and challenges for HIV and drug prevention for young women engaged in sex work.

### Strengths and Limitations

- Two comparably sampled groups of young FSW suggest changing trends in HIV risk;
- Comparison of cross-sectional samples is ecological and does not prove temporal effects;
- Criminalization and suppression of sex work and a flourishing entertainment-based sex work industry set new and conflicting stage for HIV prevention.

1 Author Contributions: All authors contributed to the design and implementation of the  
2  
3 YWHS-1 and -2 studies. Authors KP, ES, JE, and LM compiled the first draft of the  
4  
5 manuscript, which was reviewed by NS, M-CC, KS, MC, JM\_S, PP, JK. The primary  
6  
7 statistical analysis was conducted by JE and M-CC; KS and MC provided supplemental  
8  
9 data review, and KP reviewed all data analyses. All authors contributed to and have  
10  
11 approved the final manuscript. The YWHS Collaborative is a steering committee who  
12  
13 reviewed and approved the study protocols, and provided expertise into some or all of  
14  
15 the studies' methods and implementation.  
16  
17  
18  
19  
20  
21

22 Data Sharing: no additional data available.  
23  
24  
25

26 Funding sources and conflicts of interest: The Young Women's Health Study-1 and  
27  
28 YWHS-2 were supported by Awards 1R21DA025441 from the National Institute on Drug  
29  
30 Abuse, and R01NR010995 from the National Institute of Nursing Research. M-C Couture  
31  
32 was also supported by the Canadian Institutes of Health Research (postdoctoral  
33  
34 fellowship award). Professors Lisa Maher and John Kaldor are supported by Australian  
35  
36 National Health and Medical Research Council (NHMRC) Research Fellowship. The Kirby  
37  
38 Institute is affiliated with the Faculty of Medicine, University of New South Wales and is  
39  
40 funded by the Australian Government Department of Health and Ageing. The content is  
41  
42 solely the responsibility of the authors and does not necessarily represent the official  
43  
44 views of the National Institutes of Health, nor the Australian Government. The authors  
45  
46 have no conflicts to disclose.  
47  
48  
49  
50  
51  
52

53 Acknowledgments: The authors would like to acknowledge the coordinated efforts and  
54  
55 dedication of the research teams at the National Center for HIV/AIDS, Dermatology,  
56  
57 and STDs and the Cambodian Women's Development Agency. We are indebted to all the  
58  
59  
60

1  
2  
3  
4  
5  
6  
7  
8  
9  
10  
11  
12  
13  
14  
15  
16  
17  
18  
19  
20  
21  
22  
23  
24  
25  
26  
27  
28  
29  
30  
31  
32  
33  
34  
35  
36  
37  
38  
39  
40  
41  
42  
43  
44  
45  
46  
47  
48  
49  
50  
51  
52  
53  
54  
55  
56  
57  
58  
59  
60

Cambodian women who agreed to participate in this study and grateful for the privilege to work with them.

For peer review only



## Introduction

There have been significant declines in HIV prevalence in Cambodia since the epidemic peaked in around 2000, a success widely attributed to measurable increases in condom use, declines in the number and frequency of commercial sex transactions reported by men, access to HIV voluntary counseling & testing (VCT) and uptake of antiretroviral therapy.<sup>1-3</sup> In 2010, the National Center for HIV/AIDS, Dermatology and STDs (NCHADS) revised the national estimate of HIV prevalence to 0.8% (in 15-49 year olds), reflecting a significant decline after the peak estimate of 2.4% in 1998.<sup>4</sup> However, HIV prevalence in Cambodian women, especially young women, is among the highest in Southeast Asia and heterosexual sex remains the main route of transmission.<sup>5-9</sup> Since 2006, women have accounted for over half (52%) of all HIV infections in Cambodia<sup>10</sup>, higher than in Asia and the Pacific in general (35%).<sup>11</sup> Limited income generating activities, a highly mobile workforce, trafficking in women and girls and widespread transactional sex, poverty, and sexually transmitted infections (STI) have been identified as key drivers of the epidemic among female sex workers (FSW).<sup>1 5 6 10 12-15</sup> As in many countries, FSW in Cambodia can be hard to reach and difficult to provide prevention services to. In recent years significant economic and policy changes have affected the sex work landscape, with notable shifts in sex work venues, typologies, and more women engaged in transactional sex than ever before.<sup>16-20</sup>

Until 2008, FSW in Cambodia were categorized as "direct" and were mostly brothel-based, or "indirect". Indirect FSW were distinguished from direct FSW, generally working in entertainment establishments as beer promotion girls, waitresses, hostesses, or karaoke girls for example, and engaged in occasional transactional sex for supplementary income.<sup>21-23</sup> In 1997, an estimated 5,300 women worked in the entertainment/service sector and 6,000 were brothel-based FSW. The number of

1 women involved in entertainment-based sex work has grown dramatically in recent  
2 years in Cambodia. Until 2008, the estimated number of women engaged in sex and  
3 entertainment work was stable (12,762 women were enumerated in 2008), however by  
4 2012, this had increased dramatically to an estimated 41,622 women, a more than  
5 threefold increase from the 2008 estimate (NCHADS, personal communication). The  
6 reasons for this growth have not been explored in detail, but may be associated with  
7 changing economic factors during this time in Cambodia. Following the passage and  
8 implementation of the "Law on Suppression of Human Trafficking and Sexual  
9 Exploitation" in February, 2008, brothel-based sex work was banned, and the most  
10 direct effect was on direct sex trade, which went "underground", or women moved into  
11 indirect work.<sup>10</sup> Along with the overt enforcement against FSW, the 2008 anti-  
12 trafficking legislation had other consequences. For instance, official terminology used by  
13 governmental and non-governmental organizations (NGO) to describe FSW labeled all  
14 women engaged in sex and entertainment work as "entertainment workers", or EW\*.  
15 Historically, brothel-based FSW were easily accessed and monitored for HIV prevention  
16 efforts, including HIV and behavioral surveillance. NGOs working in HIV prevention  
17 reported that as transactional sex was displaced to a wider range of settings, women at  
18 highest risk became harder to reach for both prevention and service delivery.<sup>16 24 25</sup>  
19 These factors pose significant challenges to HIV prevention and threaten to undermine  
20 progress achieved to date.

---

21  
22  
23  
24  
25  
26  
27  
28  
29  
30  
31  
32  
33  
34  
35  
36  
37  
38  
39  
40  
41  
42  
43  
44  
45  
46  
47  
48  
49  
50  
51  
52  
53  
54  
55  
56  
57  
58  
59  
60

\* The term 'female sex worker' is no longer used in Cambodia. Terminology was changed in 2008 to designate high risk women working in service and entertainment venues as "entertainment workers" or EW. No new HIV surveillance data has been published on FSW, and Behavioral Surveillance Survey (BSS) methods have been changed to recognize only indirect sex workers- 'EW', and determining whether or not they are selling sex by the average number of reported sex partners per week (10. UNAIDS. Cambodia Country Progress Report: Monitoring the Progress towards the Implementation of the Declaration of Commitment on HIV and AIDS. Reporting period: January 2010-December 2011. Prepared by National AIDS Authority for United Nations General Assembly Special Session (UNGASS). . <http://www.unaids.org/en/regionscountries/countries/cambodia/> Accessed December 28, 2012..

1 HIV prevalence is extremely high among Cambodian FSW with prevalence among  
2 younger women is particularly troubling as their infection is likely to be more recent and  
3 indicative of incidence.<sup>5 8 9 21</sup> A cornerstone of HIV prevention in Cambodia was the  
4 100% Condom Use campaign<sup>26 27</sup>, primarily directed at brothel-based FSW. With  
5 changes in sex work venues, this prevention approach is likely less effective, failing to  
6 reach the large number of women now engaged in transactional sex in entertainment  
7 establishments. Indeed, measures of self-reported condom use have declined according  
8 to monitoring data reported by UNAIDS.<sup>10</sup> New risk factors have also emerged,  
9 especially amphetamine-type stimulant (ATS) use, in the form of “yama”, (pills) and  
10 “ice” (a crystalline form).<sup>28-38</sup> ATS use is associated with increased sexual risk behavior  
11 and STI incidence among these young women<sup>5 39</sup>, similar to that seen in other  
12 populations and locales.<sup>40-44</sup>

13 We conducted two prospective studies of high-risk young women engaged in  
14 transactional sex in Phnom Penh, the principal research questions focused on estimating  
15 HIV and STI prevalence and incidence and associated risk factors. The first, Young  
16 Women’s Health Study (YWHS-1), was conducted in 2007-2008 and the second, YWHS-  
17 2, in 2009-2010.<sup>5 16 39 45 46</sup> In this paper, we explore the changing HIV risk landscape by  
18 comparing and contrasting the two cohorts of FSW sampled prior to, and following,  
19 legislative changes designed to combat human trafficking and sexual exploitation in  
20 Cambodia. We theorize that the demographic characteristics and HIV risk of FSW has  
21 shifted as a result of socio-legal changes induced by the implementation of the new  
22 legislation.

## 23 **Methods**

### 24 ***Study setting***

1 The YWHS-1 and YWHS-2 were both prospective studies of young women engaged in  
2 sex work in Phnom Penh, Cambodia. Methods have been described in detail previously.<sup>5</sup>  
3  
4  
5  
6 <sup>39</sup> Both studies were led by a multidisciplinary collaborative prevention research group  
7  
8 from NCHADS, the Cambodian Women's Development Association (CWDA), the  
9  
10 University of California in San Francisco (UCSF) in the United States, and the Kirby  
11  
12 Institute at the University of New South Wales (UNSW) in Australia.  
13  
14

### 15 16 17 **Study population and recruitment**

18  
19 The target population in both studies was young women engaged in transactional sex in  
20 Phnom Penh. Inclusion criteria were: aged 15-29 years, Khmer language  
21  
22 comprehension,  $\geq 2$  different sexual partners in the last month *or* engaged in  
23  
24 transactional sex (sex in exchange for money, goods, services, or drugs) within the last  
25  
26 three months, no plans to move in the next 12 months, biologically female, and able to  
27  
28 provide voluntary informed consent. YWHS-1 aimed to sample 160 women to provide  
29  
30 80% power to estimate a point prevalence of HIV at 15% with a 95% confidence  
31  
32 interval (CI) of 9.7% to 23.0%. Based on results of YWHS-1, YWHS-2 aimed to sample  
33  
34 220 women to detect an estimated HIV prevalence of 23% (95% CI, 17.3%, 30.5%).  
35  
36  
37  
38  
39  
40  
41  
42

43 Recruitment and enrollment procedures were the same in both studies.<sup>5</sup> CWDA field  
44  
45 assistants provided study information and conducted eligibility screening via information  
46  
47 meetings in neighborhoods where sex work was prevalent. Eligible women were invited  
48  
49 to a community location used by various sex-worker organizations where study  
50  
51 information was described in more detail and written informed consent was obtained.  
52  
53 Enrolled participants were given appointment cards to present to the YWHS clinic field-  
54  
55 site and free transportation was offered. In both studies, women were remunerated  
56  
57 US\$5 at each study visit for their participation time.  
58  
59  
60

### **Data collection**

All data collection occurred at the YWHS clinic, which was staffed by a physician, nurses, counselors and a laboratory technician. A structured questionnaire was administered in Khmer by trained interviewers. Survey items were similar in both studies, and covered socio-demographic characteristics, occupational and sexual risk history, alcohol and drug use. HIV testing was conducted at each visit. In YWHS-1, urine specimens were tested for *Chlamydia trachomatis* (CT) and *Neisseria gonorrhoea* (GC). In YWHS-2, women were tested for HPV infection. STI treatment was provided at no cost, and women with HIV and HPV infection were referred to a local provider for free medical evaluation and treatment.

### **Laboratory testing**

HIV serology was performed using two rapid tests; Uni-Gold Recombigen<sup>™</sup> HIV rapid HIV test (Trinity Biotech USA, Jamestown, NY) and the Clairview HIV 1/2 STAT-PAK (Inverness Medical Diagnostics, Waltham, MA). HIV positive and discordant samples were confirmed by HIV-1 immunoblot. CT and GC were assessed from urine samples using BDProbeTec<sup>™</sup> strand displacement amplification assay (Becton Dickinson, Sparks, MD) at the NCHADS STD laboratory.<sup>5</sup> Cervical specimens for HPV testing were collected using a standard cytobrush.<sup>47</sup> Client-centered risk reduction counseling was provided in association with all testing.

### **Ethical review**

The study protocols were reviewed and approved by Institutional Review Board of the Committee on Human Research at UCSF, the Cambodian National Ethics Committee, and the University of New South Wales Human Research Ethics Committee in

1 accordance with ethical standards (institutional and national) and with the Helsinki  
2 Declaration of 1975, as revised in 2000.  
3  
4  
5  
6  
7

### 8 **Measures**

9  
10 Both studies aimed to estimate HIV infection, ATS use, and sexual risk behavior and  
11 included questions on sociodemographic factors, work history, income, and duration of  
12 sex work, and whether they currently had an employer (manager, boss or supervisor).  
13 Women were asked if they had ever and/or were currently working: as a beer promoter,  
14 in a beer garden, as a waitress or hostess in a karaoke bar, nightclub or snooker bar, in  
15 a massage parlor, brothel, as a freelance sex worker using space at a brothel, as a  
16 freelance sex worker in the park or on the street, or to specify 'other' location. They  
17 were asked about age at first sex, number of partners (last month) and condom use  
18 with last partners (paying and non-paying). Paying partners were defined as male  
19 clients with whom respondents traded sex for money, goods or drugs. Condom use was  
20 classified as "consistent" if the participant reported always using a condom. Participants  
21 were asked about the number of days in which alcohol was drunk and the number of  
22 days in which they were "affected" by alcohol or were "drunk" in the past month. ATS  
23 use (ever and last 3 months) was assessed with questions regarding use of *yama* and  
24 crystal (ice).  
25  
26  
27  
28  
29  
30  
31  
32  
33  
34  
35  
36  
37  
38  
39  
40  
41  
42  
43  
44  
45  
46

### 47 **Analyses**

48  
49 Prevalence estimates were calculated using exact binomial confidence intervals (CI).  
50 Chi-square and Fisher's Exact Tests were used to examine differences in baseline socio-  
51 demographic, occupational, sexual, and alcohol/drug use exposures and prevalent HIV  
52 and STI between the two cohorts. The only longitudinal data compared was HIV  
53 incidence. The HIV incidence rate calculated using the number of seroconversions per  
54  
55  
56  
57  
58  
59  
60

1 100 person-years of observation (PYO) assuming a Poisson distribution. Analyses were  
2 performed using STATA 9.0 (STATA, College Station, TX).  
3  
4  
5  
6  
7

## 8 **Results**

9  
10 In YWHS-1, 285 women attended community information sessions, 161 (56%) eligible  
11 women were recruited to the group information/consent meeting, and 160 (99%)  
12 consented to participate. In YWHS-2, 220 (64%) women consented out of 345 who  
13 attended information sessions. Sixty-seven women from YWHS-1 also enrolled in  
14 YWHS-2; they were not included in the YWHS-2 comparison group, leaving 153 in the  
15 analysis. Table 1 shows baseline socio-demographic and occupational factors, as well as  
16 sexual and substance use risk exposures, in the two cohorts. The cohorts were similar  
17 with respect to age (median 25 years), and age of sexual debut (median 17 and 18  
18 years, respectively), but differed significantly in years of education and marital status.  
19 Compared to women in YWHS-1, women in YWHS-2 had more education (median of 5  
20 years (IQR 2,7) vs. 2 years (IQR 0,4)), and were more likely to be married or  
21 cohabitating with a partner (31.4% vs. 15%, respectively).  
22  
23  
24  
25  
26  
27  
28  
29  
30  
31  
32  
33  
34  
35  
36  
37

38 Women in YWHS-2 had been involved in sex work for significantly less time (median of  
39 3 years (IQR 1.7, 5)) than YWHS-1 women (median of 4.3 years (IQR 2.5, 6.3)). More  
40 YWHS-2 women were currently (last 30 days) working in entertainment venues and  
41 fewer in brothels, or as freelance FSW (including in parks, guest houses, or on the  
42 street). These differences were also reflected in the significantly higher proportion of  
43 YWHS-2 women who reported having a manager or boss (81.6%) compared to YWHS-1  
44 (46%). Figure 1 shows the distribution and range of work venues women reported 'ever'  
45 working in. Women in YWHS-2 also reported significantly fewer sexual partners in the  
46 past 30 days: a median of 5 compared to 30 in YWHS-1 (Table 1). Despite these  
47 differences, women in the two samples reported similar income distributions. Self-  
48  
49  
50  
51  
52  
53  
54  
55  
56  
57  
58  
59  
60



1 reported consistent condom use, with both paying and non-paying partners, did not  
2  
3 differ between cohorts. Alcohol and ATS use differed significantly: women in YWHS-2  
4  
5 reported more alcohol use, but fewer days drunk in the past month than in YWHS-1;  
6  
7 and fewer women in YWHS-2 reported ever using ATS, although recent use was similar  
8  
9 in both groups (Table 1). Both alcohol and ATS use varied by cohort and work venue:  
10  
11 entertainment-based women in YWHS-2 reported less of both, whereas brothel and  
12  
13 freelance-based women in YWHS-2 reported significantly more ATS use (Figure 2).  
14  
15  
16  
17  
18  
19

20  
21 HIV prevalence was significantly ( $p < 0.01$ ) lower in women sampled in YWHS-2  
22  
23 compared to YWHS-1: 9.2% (95% CI 4.5%, 13.8%;  $p < 0.01$ ) vs. 23% (95% CI 16.5%,  
24  
25 29.7%) (Table 2). When the 67 women who had participated in both samples were  
26  
27 included in YWHS-2, HIV prevalence was 15.5% (95% CI 10.6, 20.3). HIV incidence  
28  
29 was also lower in YWHS-2: 0.8/100 pyo (95% CI 0.1, 6.0) vs. 3.6/100 pyo (95% CI  
30  
31 1.2, 11.1), but not significantly ( $p = 0.26$ ). In YWHS-1, prevalence of Chlamydia infection  
32  
33 was 11.5% (95% CI 6.0%, 17.1%) and Gonorrhoea infection was 7.8% (95% CI 3.5%,  
34  
35 12.3%). Women in YWHS-2 were not tested for these STI, but 41.1% were HPV. HIV  
36  
37 prevalence differed significantly by work venue and by cohort, but over 30% of  
38  
39 freelance-based women tested positive in both cohorts (Table 2).  
40  
41  
42  
43

44 In both cohorts, 20% reported being tested for HIV in the past 3 months but more  
45  
46 YWHS-2 women had a history of testing (Table 3). More women in YWHS-1 reported not  
47  
48 knowing their HIV test results: 11 of the 84 women (13.1%) who reported being  
49  
50 negative tested positive and 4 of 12 women (33.3%) who reported they did not know  
51  
52 their previous HIV results tested positive. In YWHS-2, 5 of 114 (4.4%) who reported  
53  
54 testing negative, and 2 of 4 (50%) who did not know their previous results, tested  
55  
56  
57  
58  
59  
60



1 positive. Among women who reported no history of HIV testing, 31% (18/58) and  
2  
3  
4 12.9% (4/31) tested HIV positive in YWHS-1 and -2, respectively.  
5  
6  
7

## 8 9 **Discussion**

10  
11  
12 In these two samples of young FSW, recruited using the same eligibility criteria and  
13  
14 outreach methods, we observed important differences in socio-demographics, risk  
15  
16 exposures and HIV infection outcomes. Most notably, women sampled more recently  
17  
18 were more educated, had fewer sex partners, less time working in sex work and had  
19  
20 significantly lower prevalence of HIV. Where women worked was also very different in  
21  
22 the two cohorts: a much higher proportion of women sampled in 2009-10 compared to  
23  
24 2007-8 worked in entertainment-based establishments and fewer were brothel-based or  
25  
26 freelance FSW. These differences point to the notable changes in sex work typology and  
27  
28 environment that occurred following the enactment and enforcement in 2008 of anti-  
29  
30 trafficking legislation in Cambodia<sup>16</sup>. Brothel closures and increases in policing have  
31  
32 been acknowledged as a cause of significant social and occupational upheaval among  
33  
34 FSW, driving many women, especially former brothel-based FSW, "underground".<sup>10</sup> Both  
35  
36 government agencies and NGOs in Phnom Penh have reported negative impacts of the  
37  
38 legislation on FSW including: displacement and harassment and reduced access to  
39  
40 condoms and health care.<sup>10 20 24</sup> In our qualitative research, women confirmed these  
41  
42 impacts, describing how they moved to new venues or locales for sex work transactions  
43  
44 including apartments or houses rented by brothel owners following brothel closures<sup>16</sup>,  
45  
46 raising concerns about increased risks of HIV transmission as a result of the increasingly  
47  
48 clandestine nature of direct sex work. The significant increases in the number of women  
49  
50 involved in sex work also warrants attention.  
51  
52  
53  
54  
55  
56  
57  
58  
59  
60

1 The differences in HIV prevalence, risk profiles, and sex work environments reported by  
2 these two samples are consistent with both quantitative and qualitative research  
3 demonstrating how socio-political and environmental factors can increase vulnerability  
4 to HIV among FSW.<sup>48-51</sup> The time period in which these two cohorts were sampled,  
5 corresponded with increased criminalization of sex work which impacted the number  
6 and settings of transactional sex. These shifts can have mixed effects. First, women  
7 engaged in entertainment-based work have lower risk profiles than women engaged in  
8 freelance sex work.<sup>5</sup> The shorter duration of sex work reported by entertainment-based  
9 FSW likely contributes to the lower HIV prevalence in this group. Protective effects of  
10 entertainment-based work may include having a boss or manager; odds of HIV among  
11 women who say they have a boss or manager are lower compared to women who do  
12 not (OR: 0.40; 95% CI 0.19, 0.90).<sup>5</sup> We also explored these factors in qualitative  
13 interviews with FSW.<sup>16</sup> Brothel and entertainment-based sex workers reported that the  
14 'boss/manager' mitigated risk of violence from clients and problems with police. Also,  
15 women working in entertainment establishments report earning up to three times more  
16 (US \$50-\$60 or in \$200,000-\$240,000 Cambodian Riel) per client than women who  
17 worked in brothels or streets and parks.<sup>16</sup> This is substantiated by the two cohorts'  
18 report of similar income levels despite differences in the number of sex partners. It is  
19 also possible that entertainment-based FW have lower risk partners than brothel-based  
20 and freelance FSW. We believe that despite the lower prevalence of HIV and the lower  
21 number of male sex partners reported by this growing group of FSW, there is significant  
22 potential for amplified transmission of HIV at a population level, due principally to the  
23 extraordinary growth in the size of the population engaged in sex work. The numbers  
24 enumerated by the government, are likely to include a high proportion of entertainment-  
25 based FSW who have significantly lower risk overall. But it is unclear if how well the  
26 population of high risk women, those previously working in brothels, who were not  
27  
28  
29  
30  
31  
32  
33  
34  
35  
36  
37  
38  
39  
40  
41  
42  
43  
44  
45  
46  
47  
48  
49  
50  
51  
52  
53  
54  
55  
56  
57  
58  
59  
60

1  
2  
3  
4  
5  
6  
7  
8  
9  
10  
11  
12  
13  
14  
15  
16  
17  
18  
19  
20  
21  
22  
23  
24  
25  
26  
27  
28  
29  
30  
31  
32  
33  
34  
35  
36  
37  
38  
39  
40  
41  
42  
43  
44  
45  
46  
47  
48  
49  
50  
51  
52  
53  
54  
55  
56  
57  
58  
59  
60

apparent or represented in our latter sample, are apparent in the census. These women now displaced, may or may not be counted, but are highly likely to be engaged in clandestine transactional sex, as suggested by our qualitative research. Women sampled in the YWHS-2 reflect the majority of the growing population of low risk entertainment workers: they report fewer exposures and have lower HIV prevalence, however our qualitative data also suggests that unprotected sex, length of sexual transactions, sex in risky environments may have increased<sup>16 45</sup>. While we cannot establish that the criminalization of sex work causes increases in population HIV risk from this limited data, results from these studies correspond to marked shifts in the demographic and risk population that should be investigated more thoroughly.

The two cohorts also showed differences in drug and alcohol use exposures. Our group has identified ATS use as a significant independent risk factor for HIV related risk behaviour including number of sex partners (Adjusted Risk Ratio (ARR): 1.49; 95% CI 1.0, 2.21) and incident STI (AOR: 5.41; 95% CI 1.15, 25.48)<sup>39</sup>. Alcohol use is also emerging as a potential HIV-related risk factor<sup>16</sup>, although not well quantified among FSW, especially those working in entertainment establishments (or their male partners). Entertainment venues largely revolve around alcohol, and women working at these are generally employed as hostesses, waitresses, or as “promoters” such as “beer promotion girls” in a variety of venues.<sup>16 21</sup> Women who were working in the entertainment sector were more likely to both report more days of drinking, and more days intoxicated, than brothel or street-based FSW. Alcohol use can be a barrier to effective condom use and condom negotiation in the transactional context.<sup>16 52</sup> Although women in the two samples did not report differences in inconsistent condom use, we have previously found that women who report heavy alcohol use are also significantly more likely to report inconsistent condom use.<sup>39</sup> Given how entwined drug and alcohol

1 use are with sex work, especially in the growing entertainment-based sector, there is a  
2 significant need to better elucidate ways to mitigate HIV-associated risks among women  
3 whose livelihood depends on working in these establishments. Designing and  
4 implementing prevention in these contexts will require input, not only from working  
5 women, but also from the wider business sector, as well as male clients.<sup>48 53-56</sup>  
6  
7  
8  
9  
10  
11  
12  
13  
14

15 The differences in HIV and risk profiles between the women in our two samples, as well  
16 as outreach efforts by HIV prevention organizations, may be a result of reaching “low  
17 hanging fruit” resulting from both substantive increases in the number of women  
18 working in entertainment establishments, and the increased challenges of engaging  
19 women with higher risk and who are HIV infected for the reasons described above. FSW  
20 in Phnom Penh have historically been easily accessed for prevention and surveillance  
21 efforts. However, recent changes in the sex work landscape suggest that alternative  
22 sampling methods, such as respondent driven sampling, may result in better access to  
23 higher risk women who are more hidden and therefore hard to reach in this new legal  
24 climate.<sup>57</sup>  
25  
26  
27  
28  
29  
30  
31  
32  
33  
34  
35  
36  
37  
38  
39

40 HIV prevention remains an important and essential priority for all women engaged in  
41 transactional sex. A recent systematic review confirms that FSW in Asia have the  
42 highest odds of infection compared to women of reproductive age in the general  
43 population.<sup>58</sup> In addition to new structural interventions aimed at reducing risk in the  
44 work-based environment, the very high prevalence and risk of HIV among FSW in  
45 Cambodia suggests a need for combination HIV prevention interventions including  
46 biomedical (pre-exposure prophylaxis, microbicides, and treatment as prevention),  
47 behavioural and development approaches (such as microfinance or income generating  
48 opportunities).<sup>59-64</sup>  
49  
50  
51  
52  
53  
54  
55  
56  
57  
58  
59  
60

1  
2  
3  
4 Several limitations of these analyses should be noted. First results presented here are  
5  
6 cross-sectional and thus associations do not reflect causality. The comparison of the  
7  
8 serial samples is ecological in nature and does not prove temporal effects. The sample  
9  
10 sizes are small and thus subject to limitations with respect to generalizability. Many  
11  
12 exposures are self-reported and thus may reflect social desirability bias, especially  
13  
14 condom use which we have found has been over-reported based on biomarker data.<sup>65</sup>  
15  
16 On the other hand, we have found that self-reported ATS use is accurate compared to  
17  
18 urine toxicology screening, suggesting that measures of drug and alcohol use in this  
19  
20 group are accurate.<sup>66</sup>  
21  
22  
23  
24  
25  
26

27 Results from this analysis provide important insights into recent shifts in the context of  
28  
29 sex work and risk in young FSW in Phnom Penh, highlight challenges to HIV prevention  
30  
31 in this environment, and also point to the need for more research. Conflicting trends,  
32  
33 including the criminalization and suppression of direct sex work while the indirect  
34  
35 entertainment-based sex work industry is flourishing, has potentially set a new stage.  
36  
37 Unless there is acknowledgment and access to women who are more directly engaged in  
38  
39 sex work, these women will be poorly represented in any national HIV or behavioural  
40  
41 surveillance. They will remain hidden and stigmatized, subject to repression, violence  
42  
43 and potentially with less access to prevention or care. While the 100% condom use  
44  
45 program had its criticisms, that policy at least acknowledged the existence and need for  
46  
47 HIV prevention at a multisectoral level for FSW. The current socio-political climate has  
48  
49 potentially reversed these benefits, by denying the existence of FSW. Further in-depth  
50  
51 research among both FSW, their male clients and among entertainment venue  
52  
53 management would help to elucidate the impacts, both positive and negative of these  
54  
55 new laws. The exponential growth of entertainment-based sex work has the potential to  
56  
57  
58  
59  
60

1 result in an expanding HIV epidemic among young women in Cambodia. From a  
2  
3 programmatic perspective entertainment-based FSW are much easier to reach but likely  
4  
5 require different HIV prevention interventions than the 100% condom use program.  
6  
7  
8 Implementation of research and programmatic efforts that integrate health, social  
9  
10 empowerment, and safe work environments for HIV prevention remain a high priority  
11  
12 for women engaged in sex work in Cambodia.<sup>67</sup>  
13  
14  
15  
16  
17  
18  
19  
20  
21  
22  
23  
24  
25  
26  
27  
28  
29  
30  
31  
32  
33  
34  
35  
36  
37  
38  
39  
40  
41  
42  
43  
44  
45  
46  
47  
48  
49  
50  
51  
52  
53  
54  
55  
56  
57  
58  
59  
60

## References

1. NCHADS. Ministry of Health National Center for HIV, AIDS, Dermatology and STDs. Annual Report 2009: National Centre for HIV/AIDS, Dermatology and STDs, Cambodia; <http://www.nchads.org/report.php>; Accessed July 8, 2011, 2011.
2. Saphonn V, Sopheab H, Sun LP, Vun MC, Wantha SS, Gorbach PM, et al. Current HIV/AIDS/STI epidemic: intervention programs in Cambodia, 1993-2003. *AIDS Educ Prev* 2004;16(3 Suppl A):64-77.
3. NCHADS. Behavioral Sentinel Surveillance 2010. *Cambodia National Center for HIV, AIDS, Dermatology and STD Dissemination Conference, December 30, 2010* 2011.
4. NCHADS. Ministry of Health National Center for HIV, AIDS, Dermatology and STDs. Estimation of the HIV prevalence among the general population in Cambodia. : National Centre for HIV/AIDS, Dermatology and STDs, Cambodia; <http://www.nchads.org/index.php?id=20&event=146> Accessed July 8, 2011, 2011.
5. Couture MC, Sansothy N, Saphonn V, Phal S, Sichan K, Stein E, et al. Young women engaged in sex work in Phnom Penh, Cambodia, have high incidence of HIV and sexually transmitted infections, and amphetamine-type stimulant use: new challenges to HIV prevention and risk. *Sex Transm Dis* 2011;38(1):33-9.
6. Sopheab H, Saphonn V, Chhea C, Fylkesnes K. Distribution of HIV in Cambodia: findings from the first national population survey. *AIDS* 2009;23(11):1389-95.
7. Sopheab H, Morineau G, Neal JJ, Saphonn V, Fylkesnes K. Sustained high prevalence of sexually transmitted infections among female sex workers in Cambodia: high turnover seriously challenges the 100% Condom Use Programme. *BMC Infect Dis* 2008;8:167.
8. Sopheab H, Gorbach PM, Gloyd S, Leng HB. Rural sex work in Cambodia: work characteristics, risk behaviours, HIV, and syphilis. *Sex Transm Infect* 2003;79(4):e2.
9. Saphonn V, Parekh BS, Dobbs T, Mean C, Bun LH, Ly SP, et al. Trends of HIV-1 Seroincidence Among HIV-1 Sentinel Surveillance Groups in Cambodia, 1999-2002. *J Acquir Immune Defic Syndr* 2005;39(5):587-592.
10. UNAIDS. Cambodia Country Progress Report: Monitoring the Progress towards the Implementation of the Declaration of Commitment on HIV and AIDS. Reporting period: January 2010-December 2011. Prepared by National AIDS Authority for United Nations General Assembly Special Session (UNGASS). . <http://www.unaids.org/en/regionscountries/countries/cambodia/> Accessed December 28, 2012.
11. UNAIDS. HIV in Asia and the Pacific: Getting to Zero. [http://www.unaids.org/en/media/unaids/contentassets/documents/unaidspublication/2011/20110826\\_APGettingToZero\\_en.pdf](http://www.unaids.org/en/media/unaids/contentassets/documents/unaidspublication/2011/20110826_APGettingToZero_en.pdf) 2011;Accessed December 20, 2011.
12. Samnang P, Leng HB, Kim A, Canchola A, Moss A, Mandel JS, et al. HIV prevalence and risk factors among fishermen in Sihanouk Ville, Cambodia. *Int J STD AIDS* 2004;15(7):479-83.
13. Nishigaya K. Female garment factory workers in Cambodia: migration, sex work and HIV/AIDS. *Women Health* 2002;35(4):27-42.
14. Patterson D. Southeast Asia: national policy audits on HIV and migration. *HIV AIDS Policy Law Rev* 2005;10(3):31, 33.
15. Hor LB, Detels R, Heng S, Mun P. The role of sex worker clients in transmission of HIV in Cambodia. *Int J STD AIDS* 2005;16(2):170-4.



- 1 16. Maher L, Mooney-Somers J, Phlong P, Couture MC, Stein E, Evans J, et al. Selling  
2 sex in unsafe spaces: Sex work risk environments in Phnom Penh, Cambodia.  
3 *Harm Reduct J* 2011;8(1):30.
- 4 17. Plummer R. The sex industry in Cambodia: the traffic police. . *The Economist* June  
5 11, 2009.
- 6 18. UNIAP. United Nations Inter-Agency Project on Human Trafficking (Phase III).  
7 Cambodia: Exodus to the sex trade? Effects of the global financial crisis on  
8 women's working conditions and opportunities. Report [http://www.no-  
10 trafficking.org/reports\\_docs/siren/siren\\_cb-04.pdf](http://www.no-<br/>9 trafficking.org/reports_docs/siren/siren_cb-04.pdf); Accessed August 31, 2009.
- 11 19. UNAIDS pr. More women in Cambodia turning to sex trade amid financial crisis – UN  
12 report.  
13 [http://www.un.org/apps/news/story.asp?NewsID=31541&Cr=human+trafficking  
15 &Cr1=](http://www.un.org/apps/news/story.asp?NewsID=31541&Cr=human+trafficking<br/>14 &Cr1=) 2009.
- 16 20. KHANA. Mapping the pattern of sex workers, entertainment establishments, and  
17 men who have sex with men in Cambodia. Accessed July 9, 2011. Report by Hor  
18 Bun Leng, M.D, and Tuot Sovaranny, March. 2008.
- 19 21. Kim AA, Sun LP, Chhorvann C, Lindan C, Van Griensven F, Kilmarx PH, et al. High  
20 prevalence of HIV and sexually transmitted infections among indirect sex workers  
21 in Cambodia. *Sex Transm Dis* 2005;32(12):745-51.
- 22 22. Gorbach PM, Sopheab H, Chhorvann C, Weiss RE, Vun MC. Changing behaviors and  
23 patterns among Cambodian sex workers: 1997-2003. *Journal of Acquired  
24 Immune Deficiency Syndromes* 2006;42(2):242-7.
- 25 23. Ghys PD, Jenkins C, Pisani E. HIV surveillance among female sex workers. *Aids*  
26 2001;15 Suppl 3:S33-40.
- 27 24. Francis C. HIV prevention and anti-trafficking in conflict? The public health  
28 consequences of Cambodia's fight against trafficking. FHI (in collaboration with  
29 PSI, Care, UNAIDS); December 2008.
- 30 25. FHI. SMARTgirl Program to Reduce Risk and Inspire Behavior Change. .  
31 [http://www.fhi.org/en/CountryProfiles/Cambodia/res\\_SMARTgirl.htm#](http://www.fhi.org/en/CountryProfiles/Cambodia/res_SMARTgirl.htm#) Accessed  
32 July 15th, 2011.
- 33 26. Burke KP, Munshaw S, Osburn WO, Levine J, Liu L, Sidney J, et al. Immunogenicity  
34 and cross-reactivity of a representative ancestral sequence in hepatitis C virus  
35 infection. *J Immunol* 2012;188(10):5177-88.
- 36 27. Lamptey PR. Reducing heterosexual transmission of HIV in poor countries. *Bmj  
37 Clinical Research Ed.* 2002;324(7331):207-11.
- 38 28. UNODC. Patterns and Trends of Amphetamine Type Stimulants and other drugs;  
39 Asia and the Pacific. *The Global SMART Programme (Synthetics Monitoring:  
40 Analyses, Reporting, Trends)*  
41 <http://www.unodc.org/unodc/en/scientists/smart.html> (Accessed January 5,  
42 2012) 2011.
- 43 29. Ahmad K. Increased use of amphetamine-type stimulants threatens east Asian  
44 countries. *Lancet* 2002;359(9321):1927.
- 45 30. Ahmad K. Asia grapples with spreading amphetamine abuse. *Lancet*  
46 2003;361(9372):1878-9.
- 47 31. Kulsudjarit K. Drug problem in southeast and southwest Asia. *Ann N Y Acad Sci*  
48 2004;1025:446-57.
- 49 32. Farrell M, Marsden J, Ali R, Ling W. Methamphetamine: drug use and psychoses  
50 becomes a major public health issue in the Asia Pacific region. *Addiction*  
51 2002;97(7):771-2.
- 52  
53  
54  
55  
56  
57  
58  
59  
60



- 1  
2  
3  
4  
5  
6  
7  
8  
9  
10  
11  
12  
13  
14  
15  
16  
17  
18  
19  
20  
21  
22  
23  
24  
25  
26  
27  
28  
29  
30  
31  
32  
33  
34  
35  
36  
37  
38  
39  
40  
41  
42  
43  
44  
45  
46  
47  
48  
49  
50  
51  
52  
53  
54  
55  
56  
57  
58  
59  
60
33. Mongkolsirichaikul D, Mokkhavesa C, Ratanabanangkoon K. The incidence of amphetamine use among truck drivers from various regions of Thailand. *J Med Assoc Thai* 1988;71(9):471-4.
  34. Vongsheree S, Sri-Ngam P, Ruchusatsawat N, Thaisri H, Puangtabtim W, Phutiprawan T, et al. High HIV-1 prevalence among metamphetamine users in central Thailand, 1999-2000. *J Med Assoc Thai* 2001;84(9):1263-7.
  35. Dayrit FM, Dumlao MC. Impurity profiling of methamphetamine hydrochloride drugs seized in the Philippines. *Forensic Sci Int* 2004;144(1):29-36.
  36. Lin SK, Ball D, Hsiao CC, Chiang YL, Ree SC, Chen CK. Psychiatric comorbidity and gender differences of persons incarcerated for methamphetamine abuse in Taiwan. *Psychiatry Clin Neurosci* 2004;58(2):206-12.
  37. Lua AC, Lin HR, Tseng YT, Hu AR, Yeh PC. Profiles of urine samples from participants at rave party in Taiwan: prevalence of ketamine and MDMA abuse. *Forensic Sci Int* 2003;136(1-3):47-51.
  38. Razak MH, Jittiwutikarn J, Suriyanon V, Vongchak T, Srirak N, Beyrer C, et al. HIV prevalence and risks among injection and noninjection drug users in northern Thailand: need for comprehensive HIV prevention programs. *J Acquir Immune Defic Syndr* 2003;33(2):259-66.
  39. Couture MC, Evans JL, Sothy NS, Stein ES, Sichan K, Maher L, et al. Correlates of amphetamine-type stimulant use and associations with HIV-related risks among young women engaged in sex work in Phnom Penh, Cambodia. *Drug Alcohol Depend* 2012;120(1-3):119-26.
  40. Melbye K, Khamboonruang C, Kunawararak P, Celentano DD, Prapamontol T, Nelson KE, et al. Lifetime correlates associated with amphetamine use among northern Thai men attending STD and HIV anonymous test sites. *Drug Alcohol Depend* 2002;68(3):245-53.
  41. Sattah MV, Supawitkul S, Dondero TJ, Kilmarx PH, Young NL, Mastro TD, et al. Prevalence of and risk factors for methamphetamine use in northern Thai youth: results of an audio-computer-assisted self-interviewing survey with urine testing. *Addiction* 2002;97(7):801-8.
  42. Buavirat A, Page-Shafer K, van Griensven GJ, Mandel JS, Evans J, Chuaratanaphong J, et al. Risk of prevalent HIV infection associated with incarceration among injecting drug users in Bangkok, Thailand: case-control study. *BMJ* 2003;326(7384):308.
  43. Beyrer C, Razak MH, Jittiwutikarn J, Suriyanon V, Vongchak T, Srirak N, et al. Methamphetamine users in northern Thailand: changing demographics and risks for HIV and STD among treatment-seeking substance abusers. *Int J STD AIDS* 2004;15(10):697-704.
  44. Vanichseni S, Tappero JW, Pitisuttithum P, Kitayaporn D, Mastro TD, Vimutisunthorn E, et al. Recruitment, screening and characteristics of injection drug users participating in the AIDS-VAX B/E HIV vaccine trial, Bangkok, Thailand. *Aids* 2004;18(2):311-6.
  45. Maher L, Phlong P, Mooney-Somers J, Keo S, Stein E, Couture MC, et al. Amphetamine-type stimulant use and HIV/STI risk behaviour among young female sex workers in Phnom Penh, Cambodia. *Int J Drug Policy* 2011;22(3):203-9.
  46. Kab V, Evans J, Sansothy N, Stein E, Couture M-C, Maher L, et al. Testing for amphetamine-type stimulant (ATS) use to ascertain validity of self-reported ATS use among young female sex workers in Cambodia. *Masters Thesis for University of California Berkeley, School of Public Health, MPH in Epidemiology and Biostatistics. Completed May 15, 2011.*

- 1 47. Chattergoon MA, Levine JS, Latanich R, Osburn WO, Thomas DL, Cox AL. High  
2 plasma interleukin-18 levels mark the acute phase of hepatitis C virus infection. *J*  
3 *Infect Dis* 2011;204(11):1730-40.
- 4 48. Yang C, Latkin C, Luan R, Nelson K. Condom use with female sex workers among  
5 male clients in Sichuan Province, China: the role of interpersonal and venue-level  
6 factors. *J Urban Health* 2010;87(2):292-303.
- 7 49. Erasquin JT, Reed E, Blankenship KM. Police-related experiences and HIV risk  
8 among female sex workers in Andhra Pradesh, India. *J Infect Dis* 2011;204 Suppl  
9 5:S1223-8.
- 10 50. Shannon K, Kerr T, Allinott S, Chettiar J, Shoveller J, Tyndall MW. Social and  
11 structural violence and power relations in mitigating HIV risk of drug-using  
12 women in survival sex work. *Soc Sci Med* 2008;66(4):911-21.
- 13 51. Shannon K, Kerr T, Strathdee SA, Shoveller J, Montaner JS, Tyndall MW. Prevalence  
14 and structural correlates of gender based violence among a prospective cohort of  
15 female sex workers. *BMJ* 2009;339:b2939.
- 16 52. Kalichman SC, Simbayi LC, Kaufman M, Cain D, Jooste S. Alcohol use and sexual  
17 risks for HIV/AIDS in sub-Saharan Africa: systematic review of empirical findings.  
18 *Prev Sci* 2007;8(2):141-51.
- 19 53. Morisky DE, Chiao C, Ksobiech K, Malow RM. Reducing alcohol use, sex risk  
20 behaviors, and sexually transmitted infections among Filipina female bar workers:  
21 effects of an ecological intervention. *J Prev Interv Community* 2010;38(2):104-  
22 17.
- 23 54. Surratt HL, Inciardi JA. An effective HIV risk-reduction protocol for drug-using  
24 female sex workers. *J Prev Interv Community* 2010;38(2):118-31.
- 25 55. Argento E, Reza-Paul S, Lorway R, Jain J, Bhagya M, Fathima M, et al. Confronting  
26 structural violence in sex work: lessons from a community-led HIV prevention  
27 project in Mysore, India. *Aids Care* 2011;23(1):69-74.
- 28 56. Reza-Paul S, Beattie T, Syed HU, Venukumar KT, Venugopal MS, Fathima MP, et al.  
29 Declines in risk behaviour and sexually transmitted infection prevalence following  
30 a community-led HIV preventive intervention among female sex workers in  
31 Mysore, India. *Aids* 2008;22 Suppl 5:S91-100.
- 32 57. Johnston LG, Sabin K, Mai TH, Pham TH. Assessment of respondent driven sampling  
33 for recruiting female sex workers in two Vietnamese cities: reaching the unseen  
34 sex worker. *J Urban Health* 2006;83(6 Suppl):i16-28.
- 35 58. Baral S, Beyrer C, Muessig K, Poteat T, Wirtz AL, Decker MR, et al. Burden of HIV  
36 among female sex workers in low-income and middle-income countries: a  
37 systematic review and meta-analysis. *Lancet Infect Dis* 2012;12(7):538-49.
- 38 59. Merson M, Padian N, Coates TJ, Gupta GR, Bertozzi SM, Piot P, et al. Combination  
39 HIV prevention. *Lancet* 2008;372(9652):1805-6.
- 40 60. Abdool Karim Q, Abdool Karim SS, Frohlich JA, Grobler AC, Baxter C, Mansoor LE, et  
41 al. Effectiveness and safety of tenofovir gel, an antiretroviral microbicide, for the  
42 prevention of HIV infection in women. *Science* 2010;329(5996):1168-74.
- 43 61. Grant RM, Lama JR, Anderson PL, McMahan V, Liu AY, Vargas L, et al. Preexposure  
44 chemoprophylaxis for HIV prevention in men who have sex with men. *N Engl J*  
45 *Med* 2010;363(27):2587-99.
- 46 62. Dworkin SL, Blankenship K. Microfinance and HIV/AIDS prevention: assessing its  
47 promise and limitations. *AIDS Behav* 2009;13(3):462-9.
- 48 63. Pronyk PM, Kim JC, Abramsky T, Phetla G, Hargreaves JR, Morison LA, et al. A  
49 combined microfinance and training intervention can reduce HIV risk behaviour in  
50 young female participants. *AIDS* 2008;22(13):1659-65.
- 51
- 52
- 53
- 54
- 55
- 56
- 57
- 58
- 59
- 60

- 1  
2  
3  
4  
5  
6  
7  
8  
9  
10  
11  
12  
13  
14  
15  
16  
17  
18  
19  
20  
21  
22  
23  
24  
25  
26  
27  
28  
29  
30  
31  
32  
33  
34  
35  
36  
37  
38  
39  
40  
41  
42  
43  
44  
45  
46  
47  
48  
49  
50  
51  
52  
53  
54  
55  
56  
57  
58  
59  
60
64. Rosenberg MS, Seavey BK, Jules R, Kershaw TS. The Role of a Microfinance Program on HIV Risk Behavior Among Haitian Women. *AIDS Behav* 2011;15(5):911-8.
65. Evans J, Couture M-C, Stein ES, Sansothy N, Maher L, Page K, et al. Biomarker validation of recent unprotected sexual intercourse in a prospective study of young women engaged in sex work in Phnom Penh, Cambodia. . *STD* in press.
66. Kab V, Evans J, Sansothy N, Stein E, Couture M-C, Maher L, et al. Testing for amphetamine-type stimulant (ATS) use to ascertain validity of self-reported ATS use among young female sex workers in Cambodia. . *Addiction Science & Clinical Practice* 2012;7:11-25.
67. Tucker JD, Tuminez AS. Reframing the interpretation of sex worker health: a behavioral-structural approach. *J Infect Dis* 2011;204 Suppl 5:S1206-10.

**Table 1: Selected socio-demographic characteristics, occupational, and risk exposures in two cohorts of high risk young women in Phnom Penh, Cambodia: YWHS-1 (2006-2007) and YWHS-2 (2009-2010)**

| Characteristic                                           | YWHS-1<br>N=160              |      | YWHS-2<br>N=153*             |      | p-value |
|----------------------------------------------------------|------------------------------|------|------------------------------|------|---------|
|                                                          | Prevalence of characteristic |      | Prevalence of characteristic |      |         |
|                                                          | N                            | %    | N                            | %    |         |
| <b>Age (years, median (IQR))</b>                         | 25 (21 – 27)                 |      | 25 ( 22 – 28)                |      | 0.56    |
| 16-18                                                    | 13                           | 8.1  | 11                           | 7.2  | 0.86    |
| 19-24                                                    | 64                           | 40.0 | 58                           | 37.9 |         |
| 25-29                                                    | 83                           | 51.8 | 84                           | 54.9 |         |
| <b>Marital status</b>                                    |                              |      |                              |      |         |
| Never married                                            | 57                           | 35.6 | 38                           | 24.8 | <0.01   |
| Married-living together                                  | 24                           | 15.0 | 48                           | 31.4 |         |
| Widowed/Divorced/Separated                               | 79                           | 49.4 | 67                           | 43.8 |         |
| <b>Education (years)</b>                                 |                              |      |                              |      |         |
| None                                                     | 64                           | 40.0 | 23                           | 15.0 | <0.01   |
| Primary (1-6 years)                                      | 82                           | 51.3 | 91                           | 59.5 |         |
| Secondary (7+ years)                                     | 14                           | 8.8  | 39                           | 25.5 |         |
| <b>Age at first sex (median (IQR))</b>                   | 17 (16 – 18)                 |      | 18 ( 16 – 19)                |      | 0.03    |
| ≤ 15                                                     | 32                           | 20.1 | 22                           | 14.5 | 0.19    |
| > 15                                                     | 127                          | 79.9 | 130                          | 85.5 |         |
| <b>Length of employment as FSW (years, median (IQR))</b> | 4.3 (2.5 – 6.3)              |      | 3 (1.7 – 5)                  |      | <0.01   |
| <b>Current employment venue (last 30 days)</b>           |                              |      |                              |      |         |
| Entertainment                                            | 51                           | 31.9 | 113                          | 74.3 | <0.01†  |
| Brothel                                                  | 23                           | 9.2  | 3                            | 2.0  |         |
| Freelance                                                | 59                           | 39.3 | 29                           | 19.1 |         |
| Other/Multiple                                           | 27                           | 16.9 | 7                            | 4.6  |         |
| <b>Have a manager, boss or supervisor</b>                |                              |      |                              |      |         |
| No                                                       | 82                           | 53.6 | 28                           | 14.4 | <0.01   |
| Yes                                                      | 71                           | 46.4 | 124                          | 81.6 |         |
| <b>Income in past month (US \$)</b>                      |                              |      |                              |      |         |
| Less than \$100                                          | 68                           | 42.5 | 50                           | 32.9 | 0.18    |
| 100-150\$                                                | 35                           | 21.9 | 43                           | 29.3 |         |

|                                                            |              |      |             |      |       |
|------------------------------------------------------------|--------------|------|-------------|------|-------|
| Over 150\$                                                 | 57           | 35.6 | 59          | 38.8 |       |
|                                                            |              |      |             |      |       |
| <b>Number of sex partners in last month (median (IQR))</b> | 30 (10 – 90) |      | 5 (3 – 13)  |      | <0.01 |
| ≤10                                                        | 45           | 28.1 | 112         | 73.2 | <0.01 |
| 11 – 50                                                    | 53           | 33.1 | 41          | 26.8 |       |
| > 50                                                       | 62           | 38.8 | 0           | 0    |       |
|                                                            |              |      |             |      |       |
| <b>Condom use with last paying partner</b>                 |              |      |             |      |       |
| Consistent (always)                                        | 108          | 85.7 | 86          | 87.8 | 0.66  |
| Inconsistent                                               | 18           | 14.3 | 12          | 12.2 |       |
|                                                            |              |      |             |      |       |
| <b>Condom use with last non paying partner</b>             |              |      |             |      |       |
| Consistent (always)                                        | 7            | 20.6 | 10          | 18.2 | 0.78  |
| Inconsistent                                               | 27           | 79.4 | 45          | 81.8 |       |
|                                                            |              |      |             |      |       |
| <b>Number of days drink alcohol (last month)</b>           | 15 (2 – 30)  |      | 18 (5 – 28) |      | 0.76  |
| 0 – 4                                                      | 65           | 40.6 | 36          | 23.5 | <0.01 |
| 5 – 19                                                     | 25           | 15.6 | 42          | 27.5 |       |
| ≥ 20                                                       | 70           | 43.7 | 75          | 49.0 |       |
|                                                            |              |      |             |      |       |
| <b>Number of days drunk (last month)</b>                   | 5 (1 – 20)   |      | 3 (1 – 10)  |      | 0.07  |
| 0 – 4                                                      | 89           | 55.6 | 86          | 56.2 | <0.01 |
| 5 – 19                                                     | 33           | 20.6 | 50          | 32.7 |       |
| ≥ 20                                                       | 38           | 23.7 | 17          | 11.1 |       |
|                                                            |              |      |             |      |       |
| <b>ATS use (ever)</b>                                      |              |      |             |      |       |
| No                                                         | 92           | 57.5 | 107         | 69.9 | 0.02  |
| Yes                                                        | 68           | 42.5 | 46          | 30.1 |       |
|                                                            |              |      |             |      |       |
| <b>ATS use (last 3 months)</b>                             |              |      |             |      |       |
| No                                                         | 116          | 73.4 | 117         | 76.5 | 0.54  |
| Yes                                                        | 42           | 26.6 | 36          | 23.5 |       |
|                                                            |              |      |             |      |       |
| <b>Ever used any drug prior to/during sex</b>              |              |      |             |      |       |
| No                                                         | 109          | 68.1 | 117         | 76.5 | 0.10  |
| Yes                                                        | 51           | 31.9 | 36          | 23.5 |       |
|                                                            |              |      |             |      |       |

\* Excludes women who participated in YWHS-1

†Fisher Exact p-value

Table 2: HIV prevalence overall and by current work venue in two cohorts of young high risk women in Phnom Penh, Cambodia: YWHS-1 (2006-2007) and YWHS-2 (2009-2010)

| Characteristic                                    | YWHS-1<br>N=160 |                    | YWHS-2*<br>N=153* |                    | p-value |
|---------------------------------------------------|-----------------|--------------------|-------------------|--------------------|---------|
|                                                   | N               | % (95% CI)         | N                 | %                  |         |
| <b>HIV positive</b>                               | 37              | 23.1 (16.5 – 29.7) | 14                | 9.2 (4.5 – 13.8)   | <0.01   |
| <b>HIV positive by<br/>employment venue (n/N)</b> |                 |                    |                   |                    |         |
| Entertainment                                     | 5/51            | 9.8 (1.5 – 18.1)   | 5/113             | 4.4 (0.6 – 8.2)    | <0.01   |
| Brothel                                           | 4/23            | 17.4 (1.5 – 33.3)  | 0/3               | 0                  |         |
| Freelance                                         | 22/59           | 37.3 (25.0 – 48.0) | 9/29              | 31.0 (13.8 – 48.2) |         |
| Other/Multiple                                    | 6/27            | 22.2 (6.2 – 38.3)  | 0/7               | 0                  |         |

\* Excludes women who participated in YWHS-1

**Table 3: HIV testing history and behaviors in two cohorts of young high risk women in Phnom Penh, Cambodia: YWHS-1 (2006-2007) and YWHS-2 (2009-2010)**

| Characteristic                            | YWHS-1<br>N=160 |      | YWHS-2*<br>N=153* |      | p-value |
|-------------------------------------------|-----------------|------|-------------------|------|---------|
|                                           | N               | %    | N                 | %    |         |
| <b>Ever tested for HIV</b>                |                 |      |                   |      |         |
| No                                        | 58              | 36.5 | 31                | 20.3 | <0.01   |
| Yes                                       | 101             | 63.5 | 122               | 79.7 |         |
| <b>HIV test in last 3 months</b>          |                 |      |                   |      |         |
| No                                        | 126             | 79.3 | 119               | 77.8 | 0.75    |
| Yes                                       | 33              | 20.7 | 34                | 22.2 |         |
| <b>What was result of last HIV test?#</b> |                 |      |                   |      |         |
| Negative                                  | 84              | 84.0 | 114               | 93.4 | 0.04    |
| Positive                                  | 4               | 4.0  | 4                 | 3.3  |         |
| Don't know                                | 12              | 12.0 | 4                 | 3.3  |         |
| <b>Where received last HIV test#</b>      |                 |      |                   |      |         |
| Public hospital                           | 35              | 34.7 | 55                | 34.0 | 0.10    |
| Voluntary testing and counseling center   | 1               | 1.0  | 0                 | 0    |         |
| NGO clinic                                | 59              | 58.4 | 54                | 44.3 |         |
| Private hospital, clinic, or laboratory   | 6               | 5.9  | 13                | 10.7 |         |

\* Excludes women who participated in YWHS-1

# Among those who reported being previously tested for HIV

**Figure Legend**

Figure 1: Venues where women in YWHS-2 and YWHS-2 reported ever working

Figure 2. Alcohol use in the past month and ATS use in the past 3 months reported by women in YWHS-1 and YWHS-2 by work venue: (A) Entertainment-based; (B) Brothel-based; (C) Freelance

For peer review only
